# Supplementary material for: A practical and sustainable protocol for direct amidation of unactivated esters under transition-metal-free and solvent-free conditions
Source: Royal Society of Chemistry journal article supplement (doi:10.1039/d1gc00720c), 2021-01-01

**A practical and sustainable protocol for direct amidation of unactivated esters under transition-metal-free and solvent-free conditions**

Rui Zhang,<sup>a</sup> Wei-Zhong Yao,<sup>a</sup> Liang Qian,<sup>a</sup> Wei Sang,<sup>b</sup> Ye Yuan,<sup>b</sup> Min-Chen Du,<sup>b</sup> Hua Cheng,<sup>\*,a</sup> Cheng Chen,<sup>\*,b</sup> Xin Qin<sup>\*,c</sup>

<sup>a</sup> Department of Chemical Engineering and Food Science, Hubei University of Arts and Science, 296 Longzhong Road, Xiangyang 441053, P. R. China;

<sup>b</sup> State Key Laboratory of Advanced Technology for Materials Synthesis and Processing, Wuhan University of Technology, 122 Luoshi Road, Wuhan 430070, P. R. China;

<sup>c</sup> Medicine College of Hubei University of Arts and Science, 296 Longzhong Road, Xiangyang 441053, China.

**Corresponding authors:**

Dr. Hua Cheng

Department of Chemical Engineering and Food Science, Hubei University of Arts and Science, 296 Longzhong Road, Xiangyang 441053, P. R. China.

E-mail: [cch510@126.com](mailto:cch510@126.com)

Dr. Cheng Chen

State Key Laboratory of Advanced Technology for Materials Synthesis and Processing, Wuhan University of Technology, Wuhan 430070, P. R. China.

Email: [chengchen@whut.edu.cn](mailto:chengchen@whut.edu.cn)

Dr. Xin Qin

Medicine College of Hubei University of Arts and Science, 296 Longzhong Road, Xiangyang 441053, China.

Email: [543755712@qq.com](mailto:543755712@qq.com)

**Contents:**

|                                                                                              |          |
|----------------------------------------------------------------------------------------------|----------|
| 1. Comparison of representative reported methods with this work .....                        | S2-S5    |
| 2. Green metrics of all the target compounds .....                                           | S6-S7    |
| 3. Yield-time relationship with different amounts of methyl benzoate ( <b>2a</b> ).....      | S8       |
| 4. Supplementary results for computational calculation.....                                  | S9-S16   |
| 5. Characterization data for compounds <b>3a-3ay</b> .....                                   | S17-S34  |
| 6. Original <sup>1</sup> H-NMR, <sup>13</sup> C-NMR and HRMS spectra for <b>3a-3ay</b> ..... | S35-S131 |

## 1. Comparison of representative reported methods with this work

**Table S1** Comparison of representative reported methods with this work

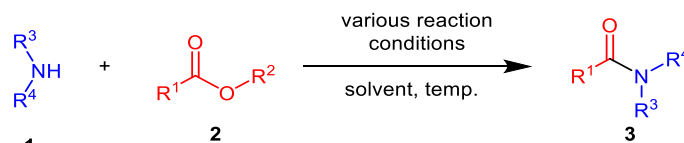

| Entry           | Year | Group                  | Solvent | Catalyst/Reagent                                            | Temp. (°C) | Time (h) | Yield (%) | Purification   | E-factor  |
|-----------------|------|------------------------|---------|-------------------------------------------------------------|------------|----------|-----------|----------------|-----------|
| 1 <sup>a</sup>  | 2005 | Porco <sup>1</sup>     | toluene | Zr(O <i>t</i> Bu) <sub>4</sub> (10 mol%)                    | rt-100     | 2-48     | 75-99     | Chromatography | 2.2-3.2   |
| 2 <sup>a</sup>  | 2011 | Milstein <sup>2</sup>  | toluene | Ruthenium-PNN complex (0.1 mol%)                            | reflux     | 18-36    | 52-99     | Chromatography | 5.7-9.9   |
| 3 <sup>a</sup>  | 2014 | Hong <sup>3</sup>      | -       | [Cp*IrCl <sub>2</sub> ] <sub>2</sub> (1.25 mol%)            | 115        | 24       | 29-99     | Chromatography | 2.5-11.3  |
| 4 <sup>a</sup>  | 2014 | Ohshima <sup>4</sup>   | -       | La(OTf) <sub>3</sub> (0.05-5.0 mol%)                        | rt-70      | 24       | 79-99     | Chromatography | 0.3-0.7   |
| 5 <sup>a</sup>  | 2015 | Xiong <sup>5</sup>     | toluene | Ru-MACHO (1 mol%)/<br>KO <i>t</i> Bu (20 mol%)              | reflux     | 48       | 55-94     | Chromatography | 6.3-10.2  |
| 6 <sup>a</sup>  | 2015 | Mecinović <sup>6</sup> | toluene | ZrCp <sub>2</sub> Cl <sub>2</sub> (10 mol%)                 | 110        | 4-20     | 31-89     | Chromatography | 1.4-7.2   |
| 7 <sup>a</sup>  | 2016 | Shah <sup>7</sup>      | THF     | Cu-Mn (10% w/w)                                             | 80         | 0.5-8    | 50-97     | Chromatography | 16.4-30.6 |
| 8 <sup>a</sup>  | 2016 | Garg <sup>8</sup>      | toluene | Ni(cod) <sub>2</sub> (15 mol%)/<br>SIPr (30 mol%)           | 60         | 12       | 15-83     | Chromatography | 6.4-52.0  |
| 9 <sup>a</sup>  | 2017 | Hu <sup>9</sup>        | NMP     | Ni(glyme)Cl <sub>2</sub> (7.5 mol%)/<br>/Phen (7.5 mol%)    | 90         | 16       | 41-87     | Chromatography | 13.3-23.0 |
| 10 <sup>a</sup> | 2018 | Newman <sup>10</sup>   | toluene | Ni(cod) <sub>2</sub> (10 mol%)/<br>/IPr (20 mol%)           | 140        | 16       | 60-92     | Chromatography | 22.8-29.0 |
| 11 <sup>a</sup> | 2019 | Newman <sup>11</sup>   | toluene | Ni(cod) <sub>2</sub> (10 mol%)/<br>NHC Ligands (10-20 mol%) | 140        | 16       | 22-95     | Chromatography | 20.4-73.8 |
| 12 <sup>a</sup> | 2019 | Zeng <sup>12</sup>     | THF     | CrCl <sub>3</sub> /dtbpy (10 mol%)                          | 90         | 12       | 34-89     | Chromatography | 7.2-16.7  |

|                 |      |                            |                        |                                                                                                                |        |          |        |                |           |
|-----------------|------|----------------------------|------------------------|----------------------------------------------------------------------------------------------------------------|--------|----------|--------|----------------|-----------|
| 13 <sup>a</sup> | 2019 | Ma <sup>13</sup>           | DMAc                   | Mg (5.0 equiv.)/<br>TMSCl (1.0 equiv.)                                                                         | 120    | 16       | 41-90  | Chromatography | 12.5-26.4 |
| 14 <sup>a</sup> | 2021 | Kobayashi <sup>14</sup>    | diglyme                | ZrO <sub>2</sub> (50 mg/mmol)                                                                                  | 140    | 6-16     | 19-98  | Chromatography | 6.4-32.9  |
| 15 <sup>a</sup> | 2021 | Niu <sup>15</sup>          | toluene                | Mn-complex (1 mol%)/<br>NaOtBu (20 mol%)                                                                       | 120    | 18       | 44-96  | Chromatography | 7.5-12.9  |
| 16 <sup>b</sup> | 2007 | Mioskowski <sup>16</sup>   | -                      | TBD (30 mol%)                                                                                                  | rt-75  | 12       | 60-94  | Chromatography | 0.9-2.2   |
| 17 <sup>b</sup> | 2009 | Birman <sup>17</sup>       | MeCN                   | 1,2,4-triazole anion (10 mol%)<br>DBU (10 mol%)                                                                | rt-95  | 10       | 62-98  | Chromatography | 1.0-2.0   |
| 18 <sup>b</sup> | 2009 | Vaidyanathan <sup>18</sup> | 2-Me-THF               | DBU (50 mol%)                                                                                                  | 40     | 0.3-6.0  | 87-95  | Chromatography | 2.0-4.1   |
| 19 <sup>b</sup> | 2013 | Jamieson <sup>19</sup>     | MeCN                   | BEMP (10 mol%)                                                                                                 | rt     | 15       | 40-100 | Chromatography | 0.4-6.5   |
| 20 <sup>b</sup> | 2015 | Jamieson <sup>20</sup>     | THF                    | CF <sub>3</sub> CH <sub>2</sub> OH (20 mol%)<br>K <sub>3</sub> PO <sub>4</sub> (1.0 equiv.)                    | 90     | 22       | 41-95  | Chromatography | 2.6-8.6   |
| 21 <sup>b</sup> | 2017 | Williams <sup>21</sup>     | EtOAc                  | AcOH (10 mol%)                                                                                                 | 80     | 20       | 70-97  | Chromatography | 2.7-3.6   |
| 22 <sup>c</sup> | 2005 | Movassaghi <sup>22</sup>   | THF                    | IMes/LiCl (5 mol%)                                                                                             | 23     | 1.5-24.0 | 31-100 | Chromatography | 4.7-17.3  |
| 23 <sup>c</sup> | 2015 | Du <sup>23</sup>           | toluene                | IMes HCl (6 mol%)/<br><i>t</i> BuOK (5 mol%)                                                                   | 60     | 14-42    | 51-87  | Chromatography | 13.3-20.9 |
| 24 <sup>d</sup> | 2011 | Neto <sup>24</sup>         | [BMIM]NTf <sub>2</sub> | BF <sub>3</sub> •Et <sub>2</sub> O or SnCl <sub>2</sub> or CdO in<br>[BMIM]NTf <sub>2</sub>                    | 135    | 3-24     | 67-99  | Chromatography | 4.5-9.8   |
| 25 <sup>d</sup> | 2015 | Wang <sup>25</sup>         | -                      | [PyPS] <sub>3</sub> PW <sub>12</sub> O <sub>40</sub> (2 mol %)                                                 | 70-140 | 0.17-1.0 | 51-97  | Chromatography | 1.0-1.8   |
| 26 <sup>c</sup> | 2005 | Gupta <sup>26</sup>        | THF/DMF                | Zn                                                                                                             | 70     | 6-26     | 64-82  | Chromatography | 5.2-11.3  |
| 27 <sup>c</sup> | 2011 | Verkade <sup>27</sup>      | THF                    | Merrifield resin-supported<br>N <sub>3</sub> @P(MeNCH <sub>2</sub> CH <sub>2</sub> ) <sub>3</sub> N (6.7 mol%) | rt     | 24-36    | 34-93  | Chromatography | 9.3-20.7  |
| 28 <sup>c</sup> | 2015 | Shimizu <sup>28</sup>      | -                      | Nb <sub>2</sub> O <sub>5</sub>                                                                                 | 140    | 30       | 62-95  | Chromatography | 1.7-3.1   |
| 29 <sup>c</sup> | 2018 | Yao <sup>29</sup>          | -                      | Lanthanide–Sodium Alkoxides (0.5<br>mol%)                                                                      | 80     | 6        | 20-99  | Chromatography | 1.2-12.4  |

|                 |      |                          |             |                                                                           |         |            |       |                              |            |
|-----------------|------|--------------------------|-------------|---------------------------------------------------------------------------|---------|------------|-------|------------------------------|------------|
| 30 <sup>f</sup> | 2009 | Quaedflieg <sup>30</sup> | THF/MTBE    | Alcalase-CLEA                                                             | 50      | 16         | 54-94 | Extraction and trituration   | 21.7-49.1  |
| 31 <sup>f</sup> | 2012 | Vadivel <sup>31</sup>    | Hexane/DIPE | Immobilized <i>Candida antarctica</i>                                     | 45      | 2-24       | 41-98 | Chromatography               | 12.8-31.6  |
| 32 <sup>f</sup> | 2017 | Hernández <sup>32</sup>  | -           | Papain/Na <sub>2</sub> CO <sub>3</sub> •10H <sub>2</sub> O (Ball milling) | rt      | 2          | 33-98 | Filtration and trituration   | 2.1-8.1    |
| 33 <sup>g</sup> | 1977 | Weinreb <sup>33</sup>    | DCM         | Me <sub>2</sub> AlNH <sub>2</sub>                                         | 25-41   | 24-26      | 80-83 | Recrystallization            | 67.5-96.6  |
| 34 <sup>g</sup> | 1992 | Roskamp <sup>34</sup>    | Hexane      | Sn[N(TMS) <sub>2</sub> ] <sub>2</sub>                                     | rt      | 12         | 30-94 | Chromatography               | 40.8-128.7 |
| 35 <sup>g</sup> | 1996 | Yamamoto <sup>35</sup>   | toluene     | Sb(OEt) <sub>3</sub> (1.21 equiv.)                                        | 80      | 9          | 90    | Chromatography               | 84.3       |
| 36 <sup>g</sup> | 1999 | Varma <sup>36</sup>      | -           | KOtBu                                                                     | MW      | 0.75-7 min | 55-91 | Extraction and trituration   | 0.9-2.3    |
| 37 <sup>g</sup> | 1999 | Maruoka <sup>37</sup>    | THF         | nBuLi                                                                     | -78     | 1          | 80-98 | Chromatography               | 5.9-6.7    |
| 38 <sup>g</sup> | 2001 | Guo <sup>38</sup>        | THF         | MgX <sub>2</sub> (50-110 mol%)                                            | rt      | 1-24       | 78-99 | HPLC                         | 20.0-24.3  |
| 39 <sup>g</sup> | 2003 | Ranu <sup>39</sup>       | -           | InI <sub>3</sub> (20 mol%)                                                | 110-120 | 5.5-9.0    | 83-93 | Recrystallization (ether/PE) | 9..9-10.2  |
| 40 <sup>g</sup> | 2006 | Woodward <sup>40</sup>   | THF         | DABAl-Me <sub>3</sub>                                                     | 40      | 19         | 69-99 | Chromatography               | 43.4-76.6  |
| 41 <sup>g</sup> | 2008 | Seeberger <sup>41</sup>  | toluene/THF | AlMe <sub>3</sub>                                                         | 100-130 | 2-5 min    | 37-98 | Chromatography               | 47.6-133.1 |
| 42 <sup>g</sup> | 2010 | Woodward <sup>42</sup>   | toluene     | Al <sub>2</sub> Ph <sub>3</sub> I <sub>3</sub> (67 mol%)                  | 80      | 3          | 56-98 | Chromatography               | 29.0-51.0  |
| 43 <sup>g</sup> | 2011 | Campbell <sup>43</sup>   | THF         | Sm(HMDS) <sub>3</sub> (1.0 equiv.)                                        | 0       | 16         | 78-99 | Chromatography               | 16.8-21.2  |
| 44 <sup>g</sup> | 2012 | Alcázar <sup>44</sup>    | THF         | <i>i</i> -PrMgCl•LiCl (3.0 equiv.)                                        | rt      | 0.3        | 61-95 | Chromatography               | 57.6-81.6  |
| 45 <sup>g</sup> | 2012 | Ohshima <sup>45</sup>    | toluene     | NaOMe (5-10 mol%)                                                         | 50      | 20-120     | 7-99  | Chromatography               | 0.35-129.1 |

|                       |                  |                        |                |                                          |           |          |              |                                     |                |
|-----------------------|------------------|------------------------|----------------|------------------------------------------|-----------|----------|--------------|-------------------------------------|----------------|
| 46 <sup>g</sup>       | 2012             | Yoon <sup>46</sup>     | THF            | KOtBu                                    | rt        | 0.17-1   | 53-94        | Chromatography                      | 52.3-63.4      |
| 47 <sup>g</sup>       | 2013             | Jamieson <sup>47</sup> | <i>i</i> -PrOH | K <sub>3</sub> PO <sub>4</sub> (30 mol%) | 60        | 22       | 42-100       | Chromatography                      | 2.9-8.8        |
| 48 <sup>g</sup>       | 2019             | Szostak <sup>48</sup>  | toluene        | LiHMDS                                   | rt        | 15       | 70-98        | Chromatography                      | 22.6-48.8      |
| <b>49<sup>g</sup></b> | <b>This work</b> |                        | -              | <b>NaOtBu (1.5 equiv.)</b>               | <b>rt</b> | <b>1</b> | <b>70-99</b> | <b>Filtration and water washing</b> | <b>0.9-1.8</b> |

<sup>a</sup> Transition-metal-based homogeneous catalysts. <sup>b</sup> Organocatalysts. <sup>c</sup> NHCs as catalysts. <sup>d</sup> Ionic liquids as catalysts. <sup>e</sup> Heterogeneous catalysts. <sup>f</sup> Enzymatic systems. <sup>g</sup> Metal salts or bases as promoters.

## 2. Green metrics of all the target compounds

**Table S2** The calculated green metrics for compounds **3a-3ay**.

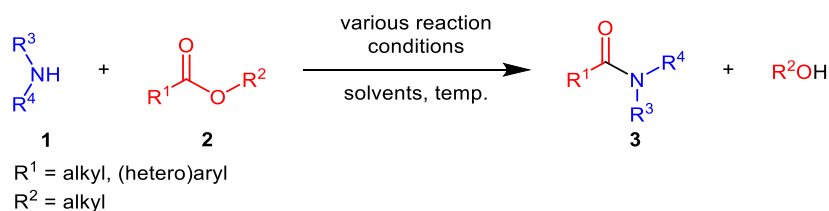

| Ref.                        | No.       | AE (%) | E-factor<br>(kg/kg) | CE (%) | RME (%) | MI<br>(kg/kg) | MP (%) |
|-----------------------------|-----------|--------|---------------------|--------|---------|---------------|--------|
| This work                   | <b>3a</b> | 86.0   | 1.4                 | 68.2   | 62.6    | 2.4           | 42.2   |
| Szostak et al <sup>48</sup> | <b>3a</b> | 86.0   | 30.6                | 79.7   | 74.1    | 31.6          | 3.2    |
| Newman et al <sup>10</sup>  | <b>3a</b> | 86.0   | 28.3                | 69.4   | 64.6    | 29.3          | 3.4    |
| This work                   | <b>3b</b> | 86.8   | 1.3                 | 70.5   | 64.8    | 2.3           | 44.3   |
| Yoon et al <sup>46</sup>    | <b>3b</b> | 82.1   | 57.7                | 79.4   | 74.5    | 58.7          | 1.7    |
| This work                   | <b>3c</b> | 87.6   | 1.4                 | 64.4   | 60.6    | 2.4           | 42.0   |
| Szostak et al <sup>48</sup> | <b>3c</b> | 87.6   | 25.9                | 81.9   | 76.8    | 26.9          | 3.7    |
| Newman et al <sup>10</sup>  | <b>3c</b> | 87.6   | 25.6                | 66.7   | 62.5    | 26.6          | 3.8    |
| This work                   | <b>3d</b> | 88.7   | 1.0                 | 75.3   | 69.8    | 2.0           | 49.6   |
| This work                   | <b>3e</b> | 87.0   | 1.5                 | 61.0   | 57.5    | 2.5           | 39.5   |
| This work                   | <b>3f</b> | 87.8   | 1.4                 | 62.6   | 60.3    | 2.4           | 42.0   |
| Yoon et al <sup>46</sup>    | <b>3f</b> | 83.4   | 55.7                | 74.5   | 71.6    | 56.7          | 1.8    |
| This work                   | <b>3g</b> | 89.5   | 1.3                 | 58.7   | 59.3    | 2.3           | 42.9   |
| This work                   | <b>3h</b> | 89.7   | 1.1                 | 67.1   | 67.1    | 2.1           | 48.7   |
| This work                   | <b>3i</b> | 89.2   | 0.9                 | 73.1   | 71.9    | 1.9           | 51.5   |
| Szostak et al <sup>48</sup> | <b>3i</b> | 89.2   | 22.7                | 80.2   | 75.6    | 23.7          | 4.2    |
| This work                   | <b>3j</b> | 87.4   | 1.1                 | 72.6   | 67.8    | 2.1           | 46.9   |
| This work                   | <b>3k</b> | 86.8   | 1.4                 | 65.0   | 59.7    | 2.4           | 40.8   |
| This work                   | <b>3l</b> | 86.8   | 1.2                 | 71.6   | 65.7    | 2.2           | 44.9   |
| Newman et al <sup>10</sup>  | <b>3l</b> | 86.8   | 26.8                | 68.3   | 63.9    | 27.8          | 3.6    |
| This work                   | <b>3m</b> | 90.0   | 0.9                 | 73.6   | 73.9    | 1.9           | 54.0   |
| This work                   | <b>3n</b> | 90.0   | 0.9                 | 71.2   | 71.5    | 1.9           | 52.2   |
| This work                   | <b>3o</b> | 89.5   | 1.3                 | 64.2   | 59.3    | 2.3           | 42.8   |
| Szostak et al <sup>48</sup> | <b>3o</b> | 89.5   | 22.6                | 78.0   | 74.1    | 23.6          | 4.2    |
| Newman et al <sup>10</sup>  | <b>3o</b> | 89.5   | 28.1                | 50.9   | 48.4    | 29.1          | 3.4    |
| This work                   | <b>3p</b> | 90.0   | 0.9                 | 77.8   | 72.9    | 1.9           | 53.2   |
| This work                   | <b>3q</b> | 90.0   | 1.0                 | 71.6   | 67.1    | 2.0           | 48.9   |
| This work                   | <b>3r</b> | 88.6   | 1.6                 | 57.2   | 53.5    | 2.6           | 37.8   |
| Szostak et al <sup>48</sup> | <b>3r</b> | 88.6   | 22.6                | 78.0   | 74.1    | 23.6          | 4.2    |
| This work                   | <b>3s</b> | 86.1   | 1.6                 | 59.7   | 56.1    | 2.6           | 37.8   |
| This work                   | <b>3t</b> | 86.1   | 1.6                 | 59.7   | 56.1    | 2.6           | 37.8   |
| This work                   | <b>3u</b> | 86.1   | 2.0                 | 51.7   | 49.9    | 3.0           | 33.7   |

|                             |            |      |      |      |      |      |      |
|-----------------------------|------------|------|------|------|------|------|------|
| This work                   | <b>3v</b>  | 86.8 | 1.3  | 68.3 | 62.7 | 2.3  | 42.9 |
| Newman et al <sup>10</sup>  | <b>3v</b>  | 86.8 | 29.0 | 63.3 | 59.1 | 30.0 | 3.3  |
| Yoon et al <sup>46</sup>    | <b>3v</b>  | 82.1 | 63.4 | 72.3 | 67.9 | 64.4 | 1.6  |
| This work                   | <b>3w</b>  | 87.5 | 1.1  | 73.6 | 67.9 | 2.1  | 47.0 |
| Newman et al <sup>10</sup>  | <b>3w</b>  | 87.5 | 22.8 | 75.2 | 70.5 | 23.8 | 4.2  |
| Yoon et al <sup>46</sup>    | <b>3w</b>  | 83.0 | 52.3 | 82.8 | 77.9 | 53.3 | 1.9  |
| This work                   | <b>3x</b>  | 86.2 | 1.8  | 56.5 | 53.4 | 2.8  | 36.1 |
| This work                   | <b>3y</b>  | 86.5 | 1.1  | 73.8 | 68.5 | 2.1  | 46.6 |
| Newman et al <sup>10</sup>  | <b>3y</b>  | 86.5 | 23.4 | 80.3 | 74.8 | 24.4 | 4.1  |
| This work                   | <b>3z</b>  | 89.2 | 1.7  | 51.7 | 50.8 | 2.7  | 36.4 |
| This work                   | <b>3aa</b> | 90.5 | 1.4  | 58.8 | 57.2 | 2.4  | 42.2 |
| This work                   | <b>3ab</b> | 88.8 | 1.7  | 54.8 | 52.4 | 2.7  | 37.3 |
| This work                   | <b>3ac</b> | 88.2 | 3.6  | 33.0 | 31.0 | 4.6  | 21.8 |
| This work                   | <b>3ad</b> | 85.5 | 1.5  | 65.6 | 60.8 | 2.5  | 40.6 |
| This work                   | <b>3ae</b> | 85.6 | 1.4  | 64.6 | 61.7 | 2.4  | 41.3 |
| This work                   | <b>3af</b> | 87.5 | 1.5  | 61.5 | 56.8 | 2.5  | 39.3 |
| This work                   | <b>3ag</b> | 86.8 | 7.6  | 18.4 | 17.0 | 8.6  | 11.6 |
| This work                   | <b>3ah</b> | 87.5 | 2.8  | 41.3 | 38.1 | 3.8  | 26.4 |
| This work                   | <b>3aj</b> | 86.8 | 1.3  | 69.8 | 64.4 | 2.3  | 44.4 |
| Szostak et al <sup>48</sup> | <b>3aj</b> | 86.8 | 28.8 | 80.2 | 74.9 | 29.8 | 3.4  |
| This work                   | <b>3ak</b> | 87.6 | 1.8  | 54.5 | 50.3 | 2.8  | 35.4 |
| Szostak et al <sup>48</sup> | <b>3ak</b> | 87.6 | 35.8 | 60.5 | 57.2 | 36.8 | 2.7  |
| This work                   | <b>3al</b> | 89.2 | 1.1  | 71.3 | 65.8 | 2.1  | 48.4 |
| Szostak et al <sup>48</sup> | <b>3al</b> | 89.2 | 25.6 | 72.1 | 70.0 | 26.6 | 3.8  |
| This work                   | <b>3am</b> | 89.6 | 1.7  | 55.0 | 50.4 | 2.7  | 37.4 |
| This work                   | <b>3an</b> | 86.8 | 1.4  | 66.0 | 60.9 | 2.4  | 41.9 |
| This work                   | <b>3ao</b> | 86.8 | 2.0  | 52.3 | 48.2 | 3.0  | 33.2 |
| Szostak et al <sup>48</sup> | <b>3ao</b> | 86.8 | 29.4 | 78.6 | 73.4 | 30.4 | 3.3  |
| This work                   | <b>3ap</b> | 86.1 | 1.3  | 71.8 | 65.4 | 2.3  | 44.1 |
| This work                   | <b>3aq</b> | 86.1 | 1.5  | 66.2 | 59.8 | 2.5  | 40.4 |
| This work                   | <b>3ar</b> | 85.4 | 1.4  | 69.7 | 63.0 | 2.4  | 41.7 |
| This work                   | <b>3as</b> | 83.4 | 2.3  | 53.7 | 48.0 | 3.3  | 30.1 |
| This work                   | <b>3at</b> | 86.4 | 1.8  | 57.9 | 53.1 | 2.8  | 36.1 |
| Szostak et al <sup>48</sup> | <b>3at</b> | 86.4 | 30.8 | 77.1 | 72.1 | 31.8 | 3.1  |
| This work                   | <b>3au</b> | 74.6 | 1.7  | 66.6 | 59.9 | 2.7  | 46.0 |
| Szostak et al <sup>48</sup> | <b>3au</b> | 74.6 | 48.8 | 61.3 | 58.1 | 49.8 | 2.0  |
| This work                   | <b>3av</b> | 88.5 | 1.2  | 68.5 | 63.8 | 2.2  | 46.0 |
| Szostak et al <sup>48</sup> | <b>3av</b> | 88.5 | 27.0 | 74.7 | 70.5 | 28.0 | 3.6  |
| This work                   | <b>3aw</b> | 89.3 | 1.0  | 71.6 | 68.9 | 2.0  | 50.1 |
| This work                   | <b>3ax</b> | 91.0 | 1.3  | 61.5 | 56.5 | 2.3  | 43.6 |
| This work                   | <b>3ay</b> | 86.3 | 2.0  | 54.6 | 49.8 | 3.0  | 33.7 |

### 3. Yield-time relationship with different amounts of methyl benzoate (2a)

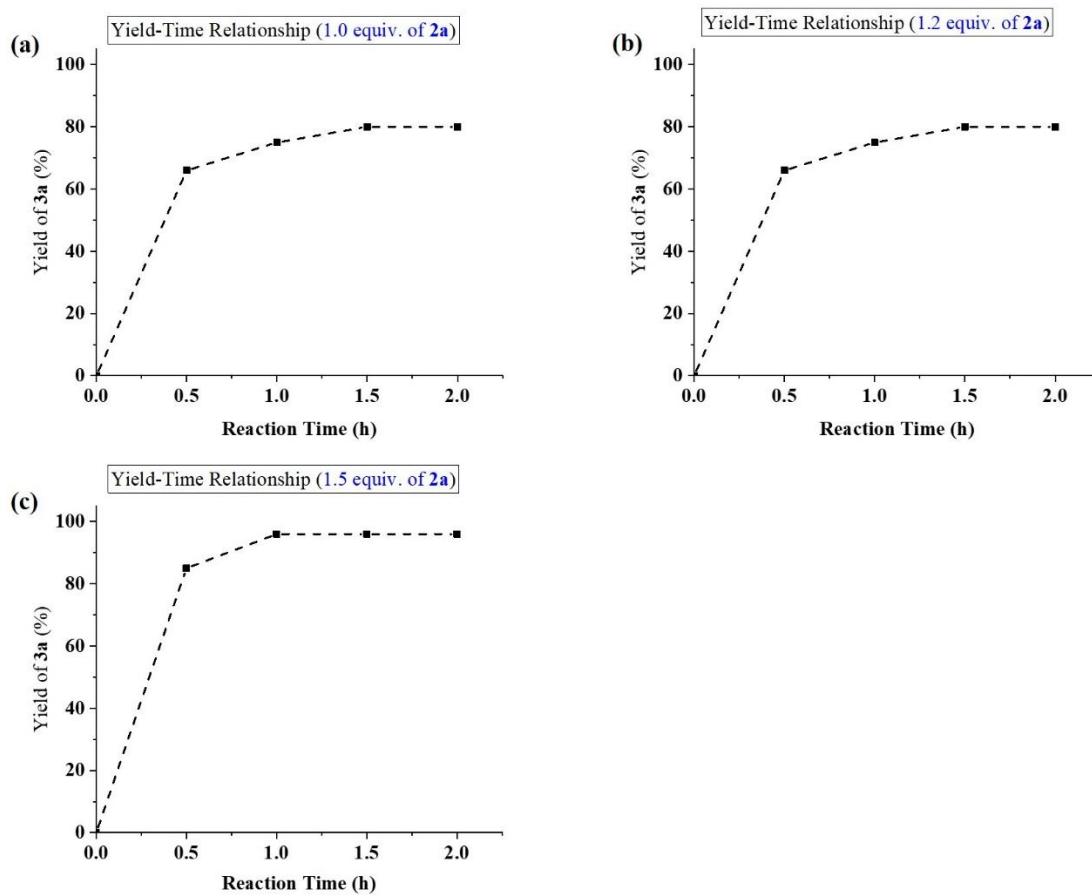

**Fig. S1** Yield-time relationship of 3a with different amounts of 2a: (a) 1.0 equiv.; (b) 1.2 equiv.; and (c) 1.5 equiv.



#### **4. Supplementary results for computational calculation**

##### **Cartesian coordinates of the structures**

%nprocs=20

%mem=20GB

# opt b3lyp/genecp freq

Intermediate 2'

|    |             |             |             |
|----|-------------|-------------|-------------|
| C  | -1.98129000 | -0.27449900 | -0.09328900 |
| C  | -1.10735900 | -1.48308800 | -0.16152800 |
| O  | -0.42019600 | -1.89521300 | 0.92177900  |
| O  | -0.94905900 | -2.13732000 | -1.18607400 |
| C  | -0.26410200 | -1.08279200 | 2.11547700  |
| C  | -1.39179700 | 0.99059300  | 0.04968900  |
| C  | -2.20547800 | 2.12395000  | 0.02681100  |
| C  | -3.58866300 | 1.99907000  | -0.12575700 |
| C  | -4.16688700 | 0.73598600  | -0.27659300 |
| C  | -3.36362000 | -0.40420100 | -0.27525300 |
| H  | -0.00276900 | -1.78866300 | 2.90532400  |
| H  | -1.19682300 | -0.57199400 | 2.36057400  |
| H  | 0.55320000  | -0.38568700 | 1.90593800  |
| H  | -0.30627000 | 1.05334300  | 0.13666700  |
| H  | -1.75485700 | 3.10788600  | 0.12401200  |
| H  | -4.21643300 | 2.88615500  | -0.13615200 |
| H  | -5.24131200 | 0.63865000  | -0.40504400 |
| H  | -3.80340500 | -1.38799300 | -0.41275500 |
| Na | 1.39180700  | -1.97838700 | -0.76968700 |
| C  | 3.97127900  | 0.07714700  | -0.86292200 |
| C  | 2.83415600  | 0.78312800  | -0.07266200 |
| C  | 2.45089000  | 2.07811800  | -0.83300000 |
| O  | 1.73916700  | -0.05225700 | 0.05264000  |
| C  | 3.38129100  | 1.16729400  | 1.32539000  |
| H  | 3.61351400  | -0.19160700 | -1.86864900 |
| H  | 4.26885400  | -0.84451200 | -0.34058400 |
| H  | 4.87211700  | 0.69365500  | -0.98735700 |
| H  | 1.67798000  | 2.62257200  | -0.27618600 |
| H  | 2.03647700  | 1.82172600  | -1.81621300 |
| H  | 3.30207800  | 2.75680600  | -0.98224400 |
| H  | 3.66030200  | 0.25973500  | 1.87600800  |
| H  | 2.59867100  | 1.67940300  | 1.89871600  |
| H  | 4.25899100  | 1.82685700  | 1.27956900  |

C H O O

6-31g(d)

\*\*\*\*

Na 0  
Lan12dz  
\*\*\*\*

Na 0  
Lan12dz

Intermediate 4

|    |             |             |             |
|----|-------------|-------------|-------------|
| C  | -4.08350200 | -0.44442700 | -0.37195100 |
| C  | -4.03351500 | 0.94998100  | -0.21875800 |
| C  | -2.78150100 | 1.55040000  | -0.08241500 |
| C  | -1.61065100 | 0.78868900  | -0.06754400 |
| C  | -1.63760400 | -0.64070900 | -0.18245900 |
| C  | -2.93200700 | -1.21885600 | -0.35900100 |
| N  | -0.47827700 | -1.35457400 | -0.06090600 |
| H  | 1.03420100  | -0.65459200 | 0.04201700  |
| H  | -0.64452000 | -2.34463000 | -0.23428100 |
| H  | -5.04601900 | -0.93561500 | -0.50520300 |
| H  | -4.94157700 | 1.54523200  | -0.23186500 |
| H  | -2.70494900 | 2.63422900  | -0.00890400 |
| H  | -0.64229700 | 1.29209700  | -0.08343200 |
| H  | -3.00370800 | -2.29941400 | -0.47666800 |
| Na | -0.00068500 | -0.15972000 | 1.90810100  |
| C  | 3.57701700  | -1.21294400 | -0.58324400 |
| C  | 2.91461100  | 0.13423400  | -0.24921800 |
| C  | 2.50949200  | 0.87138900  | -1.53638100 |
| O  | 1.74824100  | -0.10350900 | 0.54579600  |
| C  | 3.85077500  | 1.00018500  | 0.60012700  |
| H  | 2.89158300  | -1.84280700 | -1.16205000 |
| H  | 3.83602200  | -1.74740100 | 0.33773900  |
| H  | 4.49165400  | -1.07512400 | -1.17226500 |
| H  | 2.03617100  | 1.82967600  | -1.29454800 |
| H  | 1.79141300  | 0.27372600  | -2.10903900 |
| H  | 3.37905600  | 1.06769300  | -2.17496300 |
| H  | 4.11690100  | 0.47983400  | 1.52768600  |
| H  | 3.36179900  | 1.94550700  | 0.86289900  |
| H  | 4.77513200  | 1.23095100  | 0.05880200  |

CHON 0  
6-31g(d)  
\*\*\*\*

Na 0  
Lan12dz

\*\*\*\*

Na 0

Lanl2dz

The frequency of intermediate 2'

mode# frequency

|    |         |
|----|---------|
| 1  | 4.92    |
| 2  | 33.23   |
| 3  | 42.17   |
| 4  | 56.22   |
| 5  | 66.57   |
| 6  | 81.95   |
| 7  | 93.68   |
| 8  | 127.41  |
| 9  | 133.00  |
| 10 | 198.69  |
| 11 | 208.26  |
| 12 | 230.03  |
| 13 | 237.55  |
| 14 | 244.44  |
| 15 | 283.13  |
| 16 | 285.31  |
| 17 | 290.01  |
| 18 | 298.96  |
| 19 | 339.39  |
| 20 | 365.83  |
| 21 | 373.12  |
| 22 | 415.68  |
| 23 | 422.67  |
| 24 | 443.05  |
| 25 | 478.07  |
| 26 | 509.38  |
| 27 | 583.71  |
| 28 | 629.12  |
| 29 | 635.14  |
| 30 | 717.76  |
| 31 | 740.16  |
| 32 | 744.20  |
| 33 | 760.40  |
| 34 | 798.30  |
| 35 | 870.21  |
| 36 | 878.72  |
| 37 | 879.14  |
| 38 | 946.31  |
| 39 | 949.71  |
| 40 | 992.95  |
| 41 | 1012.18 |
| 42 | 1018.32 |

43 1024.12  
44 1041.85  
45 1044.25  
46 1054.53  
47 1063.60  
48 1114.57  
49 1135.62  
50 1195.46  
51 1198.69  
52 1220.81  
53 1223.28  
54 1236.81  
55 1240.55  
56 1255.44  
57 1320.96  
58 1343.28  
59 1381.91  
60 1394.06  
61 1402.99  
62 1426.33  
63 1477.45  
64 1492.44  
65 1502.85  
66 1509.04  
67 1510.58  
68 1512.93  
69 1522.92  
70 1526.72  
71 1537.71  
72 1543.73  
73 1556.73  
74 1635.65  
75 1662.24  
76 1756.93  
77 2997.12  
78 3018.74  
79 3027.35  
80 3055.45  
81 3061.13  
82 3073.12  
83 3083.22  
84 3092.43  
85 3095.32  
86 3099.49

87 3144.35  
88 3164.62  
89 3178.24  
90 3187.40  
91 3197.29  
92 3206.27  
93 3214.59

The frequency of intermediate 4

mode# frequency

1 18.86  
2 25.40  
3 42.20  
4 65.69  
5 84.83  
6 118.99  
7 160.03  
8 209.79  
9 219.02  
10 229.44  
11 269.80  
12 277.78  
13 305.44  
14 339.26  
15 352.45  
16 428.21  
17 433.29  
18 464.17  
19 473.48  
20 513.67  
21 527.31  
22 543.92  
23 633.35  
24 644.54  
25 716.75  
26 751.49  
27 757.90  
28 823.23  
29 832.57  
30 849.94  
31 916.18  
32 928.11  
33 946.07  
34 965.23

35 967.38  
36 970.44  
37 992.66  
38 1042.68  
39 1051.18  
40 1057.88  
41 1064.40  
42 1099.83  
43 1182.02  
44 1205.44  
45 1212.40  
46 1252.57  
47 1268.68  
48 1270.33  
49 1342.74  
50 1363.66  
51 1372.56  
52 1421.94  
53 1424.68  
54 1448.67  
55 1495.46  
56 1504.25  
57 1513.80  
58 1515.34  
59 1516.93  
60 1527.83  
61 1529.87  
62 1544.55  
63 1559.26  
64 1602.31  
65 1657.85  
66 2630.75  
67 3042.40  
68 3043.37  
69 3051.93  
70 3110.28  
71 3112.60  
72 3114.33  
73 3118.36  
74 3122.35  
75 3123.66  
76 3132.47  
77 3152.22  
78 3166.48

79 3173.68

80 3205.00

81 3491.67

**Table S3** The  $\Delta G$  values for the transformation of **1** to **4** and **2** to **2'**

| A          | B          | C          | $\Delta G$ (eV) = (Col(C)-Col(B)-Col(A))*27.2 |
|------------|------------|------------|-----------------------------------------------|
| NaOtBu     | <b>2</b>   | <b>2'</b>  |                                               |
| -233.18959 | -460.01908 | -693.20156 | 0.19323                                       |
|            |            |            |                                               |
| NaOtBu     | <b>1</b>   | <b>4</b>   |                                               |
| -233.18959 | -287.51352 | -520.70664 | -0.0961                                       |



## 5. Characterization data for compounds 3a-3ay

### *N*-Phenylbenzamide (3a)<sup>41</sup>

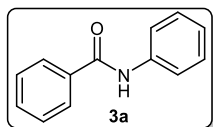

White solid, 96% yield, m.p. 162.2-163.5°C. <sup>1</sup>H-NMR (500 MHz, CDCl<sub>3</sub>) δ 7.92 – 7.81 (m, 3H), 7.65 (d, *J* = 8.0 Hz, 2H), 7.55 (t, *J* = 7.4 Hz, 1H), 7.48 (t, *J* = 7.6 Hz, 2H), 7.37 (t, *J* = 7.8 Hz, 2H), 7.16 (t, *J* = 7.4 Hz, 1H). <sup>13</sup>C-NMR (126 MHz, CDCl<sub>3</sub>) δ 165.8, 137.9, 135.0, 131.9, 129.1, 128.8, 127.0, 124.6, 120.2. HRMS (APCI): *m/z* [M+H]<sup>+</sup> calcd. for C<sub>13</sub>H<sub>12</sub>NO<sup>+</sup>: 198.09134; found: 198.09088.

### *N*-(*p*-Tolyl)benzamide (3b)<sup>48</sup>

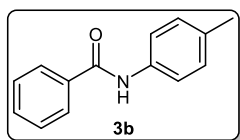

white solid, 96% yield, m.p. 159.9-161.4°C. <sup>1</sup>H-NMR (500 MHz, CDCl<sub>3</sub>) δ 7.86 (d, *J* = 7.4 Hz, 2H), 7.81 (s, 1H), 7.55-7.51 (m, 3H), 7.47 (t, *J* = 7.5 Hz, 2H), 7.17 (d, *J* = 8.0 Hz, 2H), 2.34 (s, 3H). <sup>13</sup>C-NMR (126 MHz, CDCl<sub>3</sub>) δ 165.7, 135.4, 135.0, 134.1, 131.6, 129.5, 128.6, 127.0, 120.4, 20.8. HRMS (APCI): *m/z* [M+H]<sup>+</sup> calcd. for C<sub>14</sub>H<sub>14</sub>NO<sup>+</sup>: 212.10699; found: 212.10654.

### *N*-(4-Methoxyphenyl)benzamide (3c)<sup>48</sup>

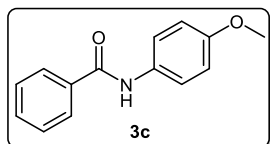

Off-white solid, 87% yield, m.p. 159.5-160.8°C. <sup>1</sup>H-NMR (500 MHz, CDCl<sub>3</sub>) δ 7.87-7.80 (m, 3H), 7.55-7.50 (m, 3H), 7.46 (t, *J* = 7.5 Hz, 2H), 6.89 (d, *J* = 8.9 Hz, 2H), 3.81 (s, 3H). <sup>13</sup>C-NMR (126 MHz, CDCl<sub>3</sub>) δ 165.7, 156.7, 135.1, 131.7, 131.0, 128.7, 127.0, 122.2, 114.3, 55.5. HRMS (APCI): *m/z* [M+H]<sup>+</sup> calcd. for C<sub>14</sub>H<sub>14</sub>NO<sub>2</sub><sup>+</sup>: 228.10191; found: 228.10138.

### *N*-(4-(*tert*-Butyl)phenyl)benzamide (3d)<sup>49</sup>

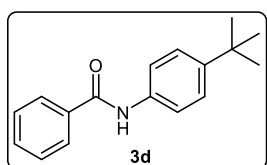

White solid, 97% yield, m.p. 141.1-141.6°C. <sup>1</sup>H-NMR (500 MHz, CDCl<sub>3</sub>) δ 7.87 (d, *J* = 7.5 Hz, 2H), 7.78 (s, 1H), 7.58-7.52 (m, 3H), 7.49 (t, *J* = 7.4 Hz, 2H), 7.39 (d, *J* = 8.2 Hz, 2H), 1.33 (s, 9H). <sup>13</sup>C-NMR (126 MHz, CDCl<sub>3</sub>) δ 165.6, 147.6, 135.3,

135.1, 131.7, 128.8, 127.0, 125.9, 120.0, 34.4, 31.4. HRMS (ESI):  $m/z$   $[M+H]^+$  calcd. for  $C_{17}H_{20}NO^+$ : 254.15394; found: 254.15341.

#### ***N*-(4-Fluorophenyl)benzamide (3e)**<sup>50</sup>

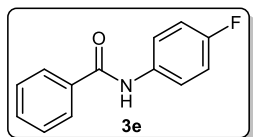

white solid, 84% yield, m.p. 187.3-188.0°C. <sup>1</sup>H-NMR (500 MHz, CDCl<sub>3</sub>) δ 7.86 (d,  $J$  = 8.0 Hz, 2H), 7.80 (s, 1H), 7.63-7.58 (m, 2H), 7.56 (d,  $J$  = 6.5, 1H), 7.52-7.46 (m, 2H), 7.11-7.03 (m, 2H).

<sup>13</sup>C-NMR (126 MHz, DMSO-*d*<sub>6</sub>) δ 165.9, 158.8 (d,  $J$  = 240.7 Hz), 136.0 (d,  $J$  = 2.6 Hz), 135.3, 132.1, 128.9, 128.1, 122.6 (d,  $J$  = 7.6 Hz), 115.6 (d,  $J$  = 22.7 Hz). HRMS (APCI):  $m/z$   $[M+H]^+$  calcd. for  $C_{13}H_{11}FNO^+$ : 216.08192; found: 216.08162.

#### ***N*-(4-Chlorophenyl)benzamide (3f)**<sup>51</sup>

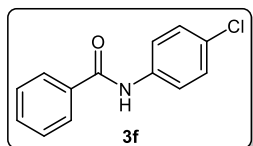

white solid, 86% yield, m.p. 195.6-197.0°C. <sup>1</sup>H-NMR (500 MHz, CDCl<sub>3</sub>) δ 7.86 (d,  $J$  = 8.1 Hz, 2H), 7.81 (s, 1H), 7.60 (d,  $J$  = 7.2 Hz, 2H), 7.56 (d,  $J$  = 6.1 Hz, 1H), 7.50 (t,  $J$  = 7.8 Hz, 2H),

7.34 (d,  $J$  = 7.1 Hz, 2H). <sup>13</sup>C-NMR (126 MHz, DMSO-*d*<sub>6</sub>) δ 166.1, 138.6, 135.2, 132.2, 129.0, 128.9, 128.2, 127.7, 122.3. HRMS (APCI):  $m/z$   $[M+H]^+$  calcd. for  $C_{13}H_{11}ClNO^+$ : 232.05237; found: 232.05200.

#### ***N*-(4-Bromophenyl)benzamide (3g)**<sup>52</sup>

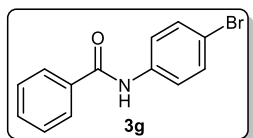

White solid, 81% yield, m.p. 206.0-206.5°C. <sup>1</sup>H-NMR (500 MHz, CDCl<sub>3</sub>) δ 7.86 (d,  $J$  = 7.8 Hz, 2H), 7.79 (s, 1H), 7.60 – 7.53 (m, 3H), 7.52 – 7.46 (m, 4H). <sup>13</sup>C-NMR (126 MHz, CDCl<sub>3</sub>) δ

165.7, 137.0, 134.6, 132.1, 128.9, 127.0, 121.7, 117.2. HRMS (APCI):  $m/z$   $[M+H]^+$  calcd. for  $C_{13}H_{11}BrNO^+$ : 276.00185; found: 276.00137.

#### ***N*-(4-(Trifluoromethoxy)phenyl)benzamide (3h)**<sup>53</sup>

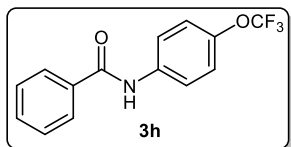

White solid, 91% yield, m.p. 185.8-186.7°C. <sup>1</sup>H-NMR (500 MHz, CDCl<sub>3</sub>) δ 7.87 (d,  $J$  = 7.8 Hz, 2H), 7.85 (s, 1H), 7.68 (d,  $J$  = 8.8 Hz, 2H), 7.58 (t,  $J$  = 7.7 Hz, 1H), 7.54 – 7.48 (m, 2H),

7.24 (d,  $J = 8.6$  Hz, 2H).  $^{13}\text{C}$ -NMR (126 MHz,  $\text{DMSO-}d_6$ )  $\delta$  166.2, 144.3 (q,  $J = 12.6$  Hz), 138.9, 135.1, 132.2, 128.9, 128.2, 122.1, 121.9, 120.7 (q,  $J = 252.0$  Hz). HRMS (APCI):  $m/z$   $[\text{M}+\text{H}]^+$  calcd. for  $\text{C}_{14}\text{H}_{11}\text{F}_3\text{NO}_2^+$ : 282.07364; found: 282.07300.

#### ***N*-(4-(Trifluoromethyl)phenyl)benzamide (3i)<sup>48</sup>**

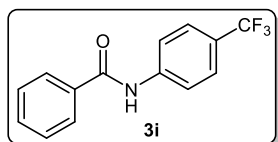

White solid, 99% yield, m.p. 203.5-204.5°C.  $^1\text{H}$ -NMR (500 MHz,  $\text{CDCl}_3$ )  $\delta$  7.97 (s, 1H), 7.88 (d,  $J = 7.7$  Hz, 2H), 7.79 (d,  $J = 8.3$  Hz, 2H), 7.63 (d,  $J = 8.4$  Hz, 2H), 7.59 (t,  $J = 7.4$  Hz, 1H), 7.52 (t,  $J = 7.5$  Hz, 2H).  $^{13}\text{C}$ -NMR (126 MHz,  $\text{DMSO-}d_6$ )  $\delta$  166.5, 143.3, 135.0, 132.4, 128.9, 128.3, 126.3 (q,  $J = 3.8$  Hz), 125.1 (q,  $J = 224.5$  Hz), 123.9 (q,  $J = 15.0$  Hz), 120.6. HRMS (APCI):  $m/z$   $[\text{M}+\text{H}]^+$  calcd. for  $\text{C}_{14}\text{H}_{11}\text{F}_3\text{NO}^+$ : 266.07873; found: 266.07806.

#### ***N*-(4-Cyanophenyl)benzamide (3j)<sup>54</sup>**

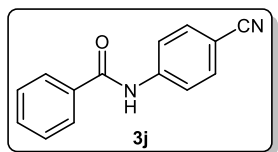

White solid, 98% yield, m.p. 172.1-173.5°C.  $^1\text{H}$ -NMR (500 MHz,  $\text{CDCl}_3$ )  $\delta$  8.05 (s, 1H), 7.87 (d,  $J = 7.7$  Hz, 2H), 7.80 (d,  $J = 8.3$  Hz, 2H), 7.66 (d,  $J = 8.3$  Hz, 2H), 7.60 (t,  $J = 7.4$  Hz, 1H), 7.51 (t,  $J = 7.6$  Hz, 2H).  $^{13}\text{C}$ -NMR (126 MHz,  $\text{CDCl}_3$ )  $\delta$  165.8, 142.0, 134.1, 133.3, 132.5, 129.0, 127.1, 119.9, 118.8, 107.4. HRMS (APCI):  $m/z$   $[\text{M}+\text{H}]^+$  calcd. for  $\text{C}_{14}\text{H}_{11}\text{N}_2\text{O}^+$ : 223.08659; found: 223.08603.

#### ***N*-(*m*-Tolyl)benzamide (3k)<sup>50</sup>**

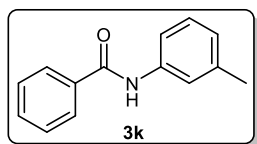

White solid, 88% yield, m.p. 126.0-127.4°C.  $^1\text{H}$ -NMR (500 MHz,  $\text{CDCl}_3$ )  $\delta$  7.86 (d,  $J = 7.8$  Hz, 2H), 7.78 (s, 1H), 7.54 (d,  $J = 6.5$  Hz, 1H), 7.52-7.45 (m, 3H), 7.41 (d,  $J = 8.1$  Hz, 1H), 7.27-7.24 (m, 1H), 6.97 (d,  $J = 7.6$  Hz, 1H), 2.37 (s, 3H).  $^{13}\text{C}$ -NMR (126 MHz,  $\text{CDCl}_3$ )  $\delta$  165.7, 139.1, 137.8, 135.1, 131.8, 128.9, 128.8, 127.0, 125.4, 120.8, 117.2, 21.5. HRMS (APCI):  $m/z$   $[\text{M}+\text{H}]^+$  calcd. for  $\text{C}_{14}\text{H}_{14}\text{NO}^+$ : 212.10699; found: 212.10651.

### *N*-(*o*-Tolyl)benzamide (**3l**)<sup>48</sup>

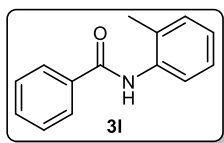

White solid, 97% yield, m.p. 143.9-144.5°C. <sup>1</sup>H-NMR (500 MHz, CDCl<sub>3</sub>) δ 7.95 (d, *J* = 8.1 Hz, 1H), 7.89 (d, *J* = 7.6 Hz, 2H), 7.68 (s, 1H), 7.57 (t, *J* = 7.3 Hz, 1H), 7.50 (t, *J* = 7.5 Hz, 2H), 7.30 – 7.21 (m, 2H), 7.13 (t, *J* = 7.5 Hz, 1H), 2.34 (s, 3H). <sup>13</sup>C-NMR (126 MHz, CDCl<sub>3</sub>) δ 165.7, 135.8, 135.1, 131.9, 130.6, 129.2, 128.9, 127.1, 127.0, 125.4, 123.1, 17.9. HRMS (APCI): *m/z* [M+H]<sup>+</sup> calcd. for C<sub>14</sub>H<sub>14</sub>NO<sup>+</sup>: 212.10699; found: 212.10649.

### *N*-(4-Bromo-2-methylphenyl)benzamide (**3m**)

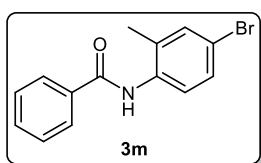

off-white solid, 99% yield, m.p. 177.8-178.2°C. <sup>1</sup>H-NMR (500 MHz, CDCl<sub>3</sub>) δ 7.93-7.85 (m, 3H), 7.60 (d, *J* = 6.6 Hz, 1H), 7.57 (d, *J* = 6.6 Hz, 1H), 7.54 – 7.48 (m, 2H), 7.39 (d, *J* = 6.1 Hz, 2H), 2.32 (s, 3H). <sup>13</sup>C-NMR (126 MHz, CDCl<sub>3</sub>) δ 165.6, 134.9, 134.6, 133.2, 132.1, 131.4, 129.9, 128.9, 127.1, 124.6, 118.2, 17.7. HRMS (APCI): *m/z* [M+H]<sup>+</sup> calcd. for C<sub>14</sub>H<sub>13</sub>BrNO<sup>+</sup>: 290.01750; found: 290.01688.

### *N*-(4-Bromo-3-methylphenyl)benzamide (**3n**)<sup>54</sup>

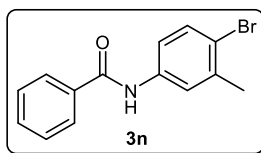

off-white solid, 96% yield, m.p. 120.7-122.1°C. <sup>1</sup>H-NMR (500 MHz, CDCl<sub>3</sub>) δ 7.86 (d, *J* = 7.9 Hz, 2H), 7.75 (s, 1H), 7.59 (s, 1H), 7.58 – 7.54 (m, 1H), 7.52-7.45 (m, 3H), 7.34 (d, *J* = 8.1 Hz, 1H), 2.41 (s, 3H). <sup>13</sup>C-NMR (126 MHz, CDCl<sub>3</sub>) δ 165.6, 138.7, 137.1, 134.7, 132.8, 132.0, 128.9, 127.0, 122.3, 119.8, 119.1, 23.1. HRMS (APCI): *m/z* [M+H]<sup>+</sup> calcd. for C<sub>14</sub>H<sub>13</sub>BrNO<sup>+</sup>: 290.01750; found: 290.01697.

### *N*-([1,1'-Biphenyl]-2-yl)benzamide (**3o**)<sup>48</sup>

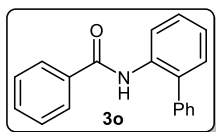

Yellow solid, 81% yield, m.p. 80.2-81.4°C. <sup>1</sup>H-NMR (500 MHz, CDCl<sub>3</sub>) δ 8.53 (d, *J* = 8.3 Hz, 1H), 8.00 (s, 1H), 7.59 (d, *J* = 7.7 Hz, 2H), 7.51 (t, *J* = 7.5 Hz, 2H), 7.48 – 7.41 (m, 5H), 7.37 (t, *J* = 7.6 Hz, 2H), 7.30 (d, *J* = 7.5 Hz, 1H), 7.21 (t, *J* = 7.5 Hz, 1H). <sup>13</sup>C-NMR (126 MHz, CDCl<sub>3</sub>) δ 164.9, 138.0, 134.9, 134.8, 132.4, 131.7, 129.9, 129.3, 129.2, 128.7, 128.6, 128.1,

126.8, 124.3, 121.1. HRMS (APCI):  $m/z$   $[M+H]^+$  calcd. for  $C_{19}H_{16}NO^+$ : 274.12264; found: 274.12195.

#### ***N*-(4-Phenoxyphenyl)benzamide (3p)<sup>50</sup>**

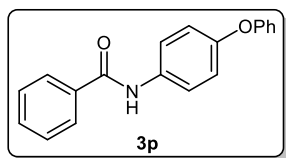

white solid, 98% yield, m.p. 161.4-162.9°C. <sup>1</sup>H-NMR (500 MHz, CDCl<sub>3</sub>) δ 10.28 (s, 1H), 7.95 (d,  $J$  = 8.0 Hz, 2H), 7.80 (d,  $J$  = 9.4 Hz, 2H), 7.63 – 7.56 (m, 1H), 7.53 (t,  $J$  = 7.7 Hz, 2H), 7.41 – 7.34 (m, 2H), 7.11 (t,  $J$  = 7.4 Hz, 1H), 7.05-6.99 (m, 4H). <sup>13</sup>C-NMR (126 MHz, DMSO-*d*<sub>6</sub>) δ 165.9, 157.8, 152.6, 135.5, 135.4, 132.0, 130.4, 128.8, 128.1, 123.5, 122.6, 119.7, 118.4. HRMS (APCI):  $m/z$   $[M+H]^+$  calcd. for  $C_{19}H_{16}NO_2^+$ : 290.11756; found: 290.11703.

#### ***N*-(4-(Phenylamino)phenyl)benzamide (3q)<sup>55</sup>**

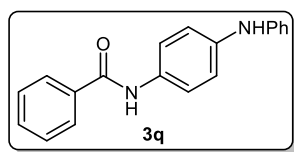

Brown solid, 90% yield, m.p. 167.3-167.7°C. <sup>1</sup>H-NMR (500 MHz, DMSO-*d*<sub>6</sub>) δ 10.11 (s, 1H), 8.09 (s, 1H), 7.98 – 7.91 (m, 2H), 7.64 (d,  $J$  = 7.3 Hz, 2H), 7.58 (t,  $J$  = 6.5 Hz, 1H), 7.55 – 7.49 (m, 2H), 7.25 – 7.18 (m, 2H), 7.10-7.05 (m, 2H), 7.04 (d,  $J$  = 7.9 Hz, 2H), 6.78 (t,  $J$  = 7.3 Hz, 1H). <sup>13</sup>C-NMR (126 MHz, DMSO-*d*<sub>6</sub>) δ 165.5, 144.5, 139.8, 135.6, 132.4, 131.8, 129.6, 128.8, 128.0, 122.3, 119.6, 118.0, 116.5. HRMS (APCI):  $m/z$   $[M+H]^+$  calcd. for  $C_{19}H_{17}N_2O^+$ : 289.13354; found: 289.13287.

#### ***N*-(Quinolin-8-yl)benzamide (3r)<sup>50</sup>**

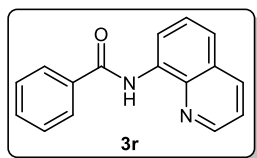

Yellow solid, 75% yield, m.p. 90.6-91.1°C. <sup>1</sup>H-NMR (500 MHz, CDCl<sub>3</sub>) δ 10.74 (s, 1H), 8.94 (d,  $J$  = 7.6 Hz, 1H), 8.83 (d,  $J$  = 4.2 Hz, 1H), 8.16 (d,  $J$  = 8.2 Hz, 1H), 8.09 (d,  $J$  = 7.4 Hz, 2H), 7.60-7.50 (m, 5H), 7.46 (dd,  $J$  = 8.3, 4.2 Hz, 1H). <sup>13</sup>C-NMR (126 MHz, CDCl<sub>3</sub>) δ 165.4, 148.2, 138.7, 136.3, 135.1, 134.5, 131.8, 128.7, 127.9, 127.4, 127.2, 121.6, 116.5. HRMS (APCI):  $m/z$   $[M+H]^+$  calcd. for  $C_{16}H_{13}N_2O^+$ : 249.10224; found: 249.10167.

### ***N*-(Pyridin-2-yl)benzamide (3s)<sup>48</sup>**

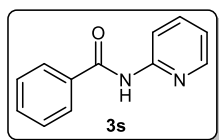

White solid, 85% yield, m.p. 84.3-85.1°C. <sup>1</sup>H-NMR (500 MHz, CDCl<sub>3</sub>) δ 8.62 (s, 1H), 8.40 (d, *J* = 8.4 Hz, 1H), 8.30 (d, *J* = 4.9 Hz, 1H), 7.93 (d, *J* = 7.9 Hz, 2H), 7.77 (t, *J* = 7.9 Hz, 1H), 7.58 (t, *J* = 6.7 Hz, 1H), 7.54 – 7.47 (m, 2H), 7.08 (dd, *J* = 7.3, 5.0 Hz, 1H). <sup>13</sup>C-NMR (126 MHz, CDCl<sub>3</sub>) δ 165.7, 151.5, 147.9, 138.5, 134.3, 132.3, 128.9, 127.2, 120.0, 114.2. HRMS (APCI): *m/z* [M+H]<sup>+</sup> calcd. for C<sub>12</sub>H<sub>11</sub>N<sub>2</sub>O<sup>+</sup>: 199.08659; found:199.08627.

### ***N*-(Pyridin-4-yl)benzamide (3t)<sup>56</sup>**

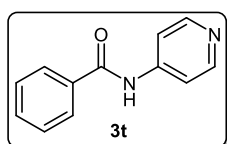

White solid, 85% yield, m.p. 210.3-211.6°C. <sup>1</sup>H-NMR (500 MHz, DMSO-*d*<sub>6</sub>) δ 10.59 (s, 1H), 8.48 (d, *J* = 5.2 Hz, 2H), 7.96 (d, *J* = 7.6 Hz, 2H), 7.79 (d, *J* = 5.3 Hz, 2H), 7.63 (t, *J* = 7.2 Hz, 1H), 7.56 (t, *J* = 7.5 Hz, 2H). <sup>13</sup>C-NMR (126 MHz, CDCl<sub>3</sub>) δ 166.1, 150.8, 145.1, 134.1, 132.6, 129.0, 127.2, 113.8. HRMS (APCI): *m/z* [M+H]<sup>+</sup> calcd. for C<sub>12</sub>H<sub>11</sub>N<sub>2</sub>O<sup>+</sup>: 199.08659; found:199.08623.

### ***N*-(Pyrimidin-2-yl)benzamide (3u)<sup>57</sup>**

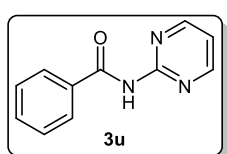

White solid, 75% yield, m.p. 138.8-139.1°C. <sup>1</sup>H-NMR (500 MHz, CDCl<sub>3</sub>) δ 8.88 (s, 1H), 8.63 (d, *J* = 4.7 Hz, 2H), 7.95 (d, *J* = 7.7 Hz, 2H), 7.58 (t, *J* = 7.3 Hz, 1H), 7.50 (t, *J* = 7.5 Hz, 2H), 7.05 (t, *J* = 4.7 Hz, 1H). <sup>13</sup>C-NMR (126 MHz, CDCl<sub>3</sub>) δ 165.1, 158.3, 157.7, 134.3, 132.3, 128.7, 127.5, 116.7. HRMS (APCI): *m/z* [M+H]<sup>+</sup> calcd. for C<sub>11</sub>H<sub>10</sub>N<sub>3</sub>O<sup>+</sup>: 200.08184; found: 200.08150.

### ***N*-Benzylbenzamide (3v)<sup>58</sup>**

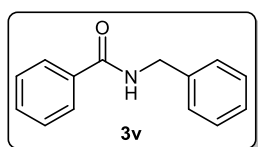

White solid, 93% yield, m.p. 105.7-107.1°C. <sup>1</sup>H-NMR (500 MHz, CDCl<sub>3</sub>) δ 7.79 (d, *J* = 7.6 Hz, 2H), 7.49 (t, *J* = 7.3 Hz, 1H), 7.42 (t, *J* = 7.5 Hz, 2H), 7.35 (d, *J* = 4.3 Hz, 4H), 7.32 – 7.27 (m, 1H), 6.46 (s, 1H), 4.64 (d, *J* = 5.6 Hz, 2H). <sup>13</sup>C-NMR (126 MHz, CDCl<sub>3</sub>) δ 167.4, 138.3,

134.4, 131.5, 128.8, 128.6, 127.9, 127.6, 127.0, 44.1. HRMS (APCI):  $m/z$   $[M+H]^+$  calcd. for  $C_{14}H_{14}NO^+$ : 212.10699; found: 212.10661.

### ***N*-Phenethylbenzamide (3w)<sup>59</sup>**

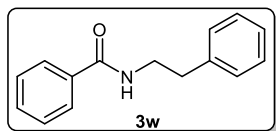

White solid, 98% yield, m.p. 116.9-117.6°C. <sup>1</sup>H-NMR (500 MHz, CDCl<sub>3</sub>) δ 7.69 (d,  $J$  = 8.0 Hz, 2H), 7.50 – 7.45 (m, 1H), 7.39 (t,  $J$  = 7.5 Hz, 2H), 7.32 (t,  $J$  = 7.4 Hz, 2H), 7.25-7.20 (m, 3H), 6.24 (s, 1H), 3.71 (q,  $J$  = 6.6 Hz, 2H), 2.93 (t,  $J$  = 7.0 Hz, 2H). <sup>13</sup>C-NMR (126 MHz, CDCl<sub>3</sub>) δ 167.5, 138.9, 134.7, 131.4, 128.8, 128.7, 128.6, 126.8, 126.6, 41.2, 35.7. HRMS (APCI):  $m/z$   $[M+H]^+$  calcd. for  $C_{15}H_{16}NO^+$ : 226.12264; found: 226.12224.

### ***N*-(Furan-2-ylmethyl)benzamide (3x)<sup>60</sup>**

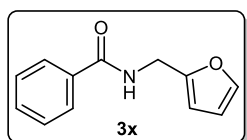

White solid, 80% yield, m.p. 103.8-105.1°C. <sup>1</sup>H-NMR (500 MHz, CDCl<sub>3</sub>) δ 7.78 (d,  $J$  = 7.6 Hz, 2H), 7.50 (t,  $J$  = 7.6 Hz, 1H), 7.43 (t,  $J$  = 7.5 Hz, 2H), 7.38 (s, 1H), 6.42 (s, 1H), 6.36-6.33 (m, 1H), 6.30 (d,  $J$  = 3.2 Hz, 1H), 4.65 (d,  $J$  = 5.5 Hz, 2H). <sup>13</sup>C-NMR (126 MHz, CDCl<sub>3</sub>) δ 167.2, 151.2, 142.3, 134.2, 131.6, 128.6, 127.0, 110.5, 107.7, 37.0. HRMS (APCI):  $m/z$   $[M+H]^+$  calcd. for  $C_{12}H_{12}NO_2^+$ : 202.08626; found: 202.08586.

### ***N*-Hexylbenzamide (3y)<sup>61</sup>**

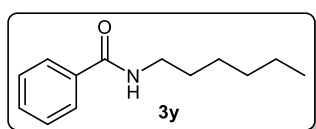

White solid, 95% yield, m.p. 42.2-43.6°C. <sup>1</sup>H-NMR (500 MHz, CDCl<sub>3</sub>) δ 7.75 (d,  $J$  = 7.6 Hz, 2H), 7.47 (t,  $J$  = 7.3 Hz, 1H), 7.41 (t,  $J$  = 7.5 Hz, 2H), 6.26 (s, 1H), 3.43 (q,  $J$  = 6.8 Hz, 2H), 1.59 (q,  $J$  = 7.4 Hz, 2H), 1.40 – 1.26 (m, 6H), 0.94 – 0.83 (m, 3H). <sup>13</sup>C-NMR (126 MHz, CDCl<sub>3</sub>) δ 167.5, 134.9, 131.2, 128.5, 126.8, 40.1, 31.5, 29.6, 26.6, 22.5, 13.9. HRMS (APCI):  $m/z$   $[M+H]^+$  calcd. for  $C_{13}H_{20}NO^+$ : 206.15394; found: 206.15349.

### ***tert*-Butyl (2-benzamidoethyl)carbamate (3z)<sup>62</sup>**

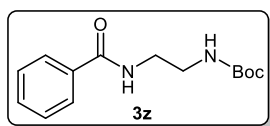

White solid, 70% yield, m.p. 129.8-131.2°C. <sup>1</sup>H-NMR (500 MHz, CDCl<sub>3</sub>) δ 7.82 (d, *J* = 7.6 Hz, 2H), 7.48 (t, *J* = 7.3 Hz, 1H), 7.41 (t, *J* = 7.5 Hz, 2H), 7.26 (s, 1H), 5.12 (s, 1H), 3.55 (q, *J* = 5.4 Hz, 2H), 3.40 (q, *J* = 5.9 Hz, 2H), 1.42 (s, 9H). <sup>13</sup>C-NMR (126 MHz, CDCl<sub>3</sub>) δ 167.9, 157.5, 134.1, 131.4, 128.4, 127.0, 79.9, 41.9, 39.9, 28.3. HRMS (APCI): *m/z* [M+H]<sup>+</sup> calcd. for C<sub>14</sub>H<sub>21</sub>N<sub>2</sub>O<sub>3</sub><sup>+</sup>: 265.15467; found: 265.15411.

### ***tert*-Butyl 4-benzamidopiperidine-1-carboxylate (3aa)<sup>63</sup>**

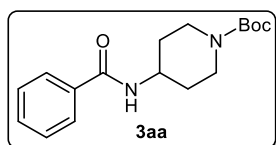

White solid, 76% yield, m.p. 172.3-173.6°C. <sup>1</sup>H-NMR (500 MHz, CDCl<sub>3</sub>) δ 7.75 (d, *J* = 7.6 Hz, 2H), 7.53 – 7.46 (m, 1H), 7.44 (d, *J* = 7.6 Hz, 2H), 6.06 – 5.92 (m, 1H), 4.18 – 4.04 (m, 3H), 2.97-2.84 (m, 2H), 2.05-1.97 (m, 2H), 1.47 (s, 9H), 1.43-1.30 (m, 2H). <sup>13</sup>C-NMR (126 MHz, CDCl<sub>3</sub>) δ 166.8, 154.7, 134.6, 131.5, 128.6, 126.8, 79.7, 47.3, 42.8, 32.2, 28.4. HRMS (APCI): *m/z* [M-H]<sup>-</sup> calcd. for C<sub>17</sub>H<sub>23</sub>N<sub>2</sub>O<sub>3</sub><sup>-</sup>: 303.17142; found: 303.17145.

### **Methyl 4-benzamidobenzoate (3ab)<sup>64</sup>**

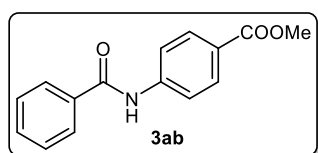

White solid, 73% yield, m.p. 160.0-161.3°C. <sup>1</sup>H NMR (500 MHz, CDCl<sub>3</sub>) δ 8.06 (d, *J* = 7.5 Hz, 2H), 8.01 (s, 1H), 7.88 (d, *J* = 6.7 Hz, 2H), 7.75 (d, *J* = 7.5 Hz, 2H), 7.57 (d, *J* = 6.5 Hz, 1H), 7.51 (d, *J* = 6.6 Hz, 2H), 3.92 (s, 3H). <sup>13</sup>C NMR (126 MHz, CDCl<sub>3</sub>) δ 166.6, 165.7, 142.1, 134.5, 132.2, 130.9, 128.9, 127.0, 125.9, 119.2, 52.0. HRMS (APCI): *m/z* [M+H]<sup>+</sup> calcd. for C<sub>15</sub>H<sub>14</sub>NO<sub>3</sub><sup>+</sup>: 256.09682; found: 256.09647.

### ***N*-(4-(3-oxo-3-phenylpropanoyl)phenyl)benzamide (3ac)<sup>65</sup>**

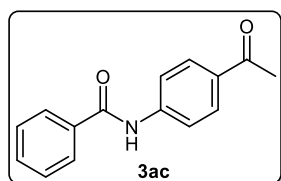

White solid, 44% yield, m.p. 199.5-201.0°C. <sup>1</sup>H NMR (500 MHz, CDCl<sub>3</sub>) δ 8.00 (d, *J* = 7.8 Hz, 3H), 7.89 (d, *J* = 7.3 Hz, 2H), 7.77 (d, *J* = 8.2 Hz, 2H), 7.61 – 7.56 (m, 1H), 7.52 (t, *J* = 7.3 Hz, 2H), 2.60 (s, 3H). <sup>13</sup>C NMR (126 MHz, CDCl<sub>3</sub>) δ 196.9, 165.7, 142.2, 134.5, 133.2, 132.3, 129.8, 128.9, 127.1, 119.2, 26.5. HRMS (APCI): *m/z*



$[M+H]^+$  calcd. for  $C_{15}H_{14}NO_2^+$ : 240.10191; found: 240.10165.

### Phenyl(piperidin-1-yl)methanone (3ad)<sup>60</sup>

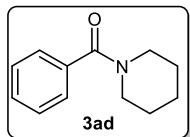

White solid, 93% yield, m.p. 46.5-48.0°C. <sup>1</sup>H-NMR (500 MHz, CDCl<sub>3</sub>) δ 7.38 (s, 5H), 3.71 (s, 2H), 3.33 (s, 2H), 1.70 – 1.48 (m, 6H). <sup>13</sup>C-NMR (126 MHz, CDCl<sub>3</sub>) δ 170.2, 136.5, 129.3, 128.3, 126.7, 48.7, 43.0, 26.5, 25.6, 24.5.

### Morpholino(phenyl)methanone (3ae)<sup>60</sup>

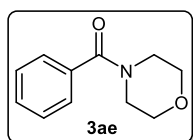

Colorless solid, 94% yield, m.p. 73.6-74.9°C. <sup>1</sup>H-NMR (500 MHz, CDCl<sub>3</sub>) δ 7.43 – 7.32 (m, 5H), 3.82 – 3.31 (m, 8H). <sup>13</sup>C-NMR (126 MHz, CDCl<sub>3</sub>) δ 170.4, 135.3, 129.9, 128.6, 127.1, 66.9, 48.2, 42.6.

### N-benzyl-N-methylbenzamide (3af)<sup>60</sup>

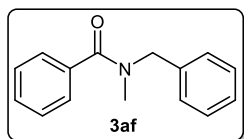

White solid, 82% yield, m.p. 163.7-165.1°C. <sup>1</sup>H-NMR (500 MHz, CDCl<sub>3</sub>) δ 7.48 – 7.43 (m, 2H), 7.42 – 7.32 (m, 6H), 7.31 – 7.26 (m, 1H), 7.17 (s, 1H), 4.82 – 4.41 (m, 2H), 3.12 – 2.77 (m, 3H). <sup>13</sup>C-NMR (126 MHz, CDCl<sub>3</sub>) δ 172.3, 171.6, 137.0, 136.6, 136.2, 129.6, 128.8, 128.4, 128.2, 127.5, 127.0, 126.8, 55.2, 50.8, 37.0, 33.1.

### N-Methyl-N-phenylbenzamide (3ag)<sup>66</sup>

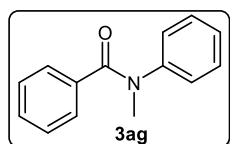

Colorless oil, 25% yield. <sup>1</sup>H-NMR (500 MHz, CDCl<sub>3</sub>) δ 7.29 (d, *J* = 7.7 Hz, 2H), 7.26 – 7.19 (m, 3H), 7.19 – 7.11 (m, 3H), 7.03 (d, *J* = 7.8 Hz, 2H), 3.50 (s, 3H). <sup>13</sup>C NMR (126 MHz, CDCl<sub>3</sub>) δ 170.6, 144.9, 135.9, 129.5, 129.1, 128.7, 127.7, 126.9, 126.4, 38.4. HRMS (APCI): *m/z*  $[M+H]^+$  calcd. for  $C_{14}H_{14}NO^+$ : 212.10699; found: 212.10667.

#### ***N*-Methyl-*N*-(*p*-tolyl)benzamide (3ah)<sup>67</sup>**

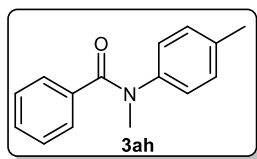

Colorless oil, 55% yield. <sup>1</sup>H-NMR (500 MHz, CDCl<sub>3</sub>) δ 7.30 (d, *J* = 7.6 Hz, 2H), 7.22 (t, *J* = 7.4 Hz, 1H), 7.16 (t, *J* = 7.5 Hz, 2H), 7.01 (d, *J* = 7.8 Hz, 2H), 6.91 (d, *J* = 7.8 Hz, 2H), 3.46 (s, 3H), 2.26 (s, 3H). <sup>13</sup>C NMR (126 MHz, CDCl<sub>3</sub>) δ 170.6, 142.3, 136.2, 136.0, 129.7, 129.4, 128.6, 127.6, 126.6, 38.4, 20.9. HRMS (APCI): *m/z* [M+H]<sup>+</sup> calcd. for C<sub>15</sub>H<sub>16</sub>NO<sup>+</sup>: 226.12264; found: 226.12129.

#### **4-Methyl-*N*-phenylbenzamide (3aj)<sup>52</sup>**

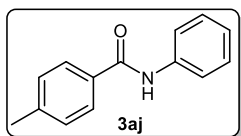

White solid, 97% yield, m.p. 145.5-145.6°C. <sup>1</sup>H-NMR (500 MHz, CDCl<sub>3</sub>) δ 7.80 (s, 1H), 7.77 (d, *J* = 7.1 Hz, 2H), 7.64 (d, *J* = 7.9 Hz, 2H), 7.37 (t, *J* = 7.2 Hz, 2H), 7.29 (d, *J* = 7.8 Hz, 2H), 7.15 (t, *J* = 6.9 Hz, 1H), 2.43 (s, 3H). <sup>13</sup>C-NMR (126 MHz, CDCl<sub>3</sub>) δ 165.6, 142.4, 138.0, 132.1, 129.4, 129.1, 127.0, 124.4, 120.1, 21.5. HRMS (APCI): *m/z* [M+H]<sup>+</sup> calcd. for C<sub>14</sub>H<sub>14</sub>NO<sup>+</sup>: 212.10699; found: 212.10651.

#### **4-Methoxy-*N*-phenylbenzamide (3ak)<sup>52</sup>**

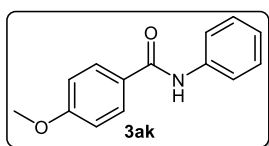

White solid, 76% yield, m.p. 172.4-173.0°C. <sup>1</sup>H-NMR (500 MHz, CDCl<sub>3</sub>) δ 7.84 (d, *J* = 7.2 Hz, 2H), 7.74 (s, 1H), 7.63 (d, *J* = 8.0 Hz, 2H), 7.40 – 7.33 (m, 2H), 7.14 (t, *J* = 7.5 Hz, 1H), 6.98 (d, *J* = 7.2 Hz, 2H), 3.87 (s, 3H). <sup>13</sup>C-NMR (126 MHz, CDCl<sub>3</sub>) δ 165.3, 162.5, 138.1, 129.1, 128.9, 127.2, 124.4, 120.2, 114.0, 55.5. HRMS (APCI): *m/z* [M+H]<sup>+</sup> calcd. for C<sub>14</sub>H<sub>14</sub>NO<sub>2</sub><sup>+</sup>: 228.10191; found: 228.10135.

#### ***N*-Phenyl-4-(trifluoromethyl)benzamide (3al)<sup>48</sup>**

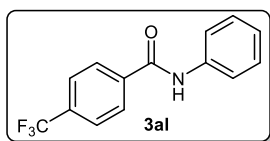

White solid, 99% yield, m.p. 207.5-208.2°C. <sup>1</sup>H-NMR (500 MHz, CDCl<sub>3</sub>) δ 7.99 (d, *J* = 7.9 Hz, 2H), 7.80 (s, 1H), 7.76 (d, *J* = 8.1 Hz, 2H), 7.64 (d, *J* = 7.9 Hz, 2H), 7.40 (t, *J* = 7.8 Hz, 2H), 7.19 (t, *J* = 7.5 Hz, 1H). <sup>13</sup>C-NMR (126 MHz, DMSO-*d*<sub>6</sub>) δ 164.9, 139.3, 139.2, 131.9 (q, *J* = 31.8 Hz), 129.1, 129.0, 125.8 (q, *J* = 3.7 Hz), 124.5 (q, *J* = 274.9 Hz),

124.4, 120.9. HRMS (APCI):  $m/z$   $[M+H]^+$  calcd. for  $C_{14}H_{11}F_3NO^+$ : 266.07873; found: 266.07803.

#### 4-Bromo-*N*-phenylbenzamide (3am)<sup>68</sup>

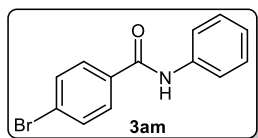

White solid, 76% yield, m.p. 207.5-208.2°C. <sup>1</sup>H-NMR (500 MHz, DMSO-*d*<sub>6</sub>) δ 10.31 (s, 1H), 7.92 (d,  $J = 7.7$  Hz, 2H), 7.80-7.72 (m, 4H), 7.36 (t,  $J = 7.6$  Hz, 2H), 7.12 (t,  $J = 7.4$  Hz, 1H).

<sup>13</sup>C-NMR (126 MHz, DMSO-*d*<sub>6</sub>) δ 165.0, 139.4, 134.5, 131.9, 130.3, 129.1, 125.8, 124.3, 120.9. HRMS (APCI):  $m/z$   $[M+H]^+$  calcd. for  $C_{13}H_{11}BrNO^+$ : 276.00185; found: 276.00140.

#### 3-Methyl-*N*-phenylbenzamide (3an)<sup>52</sup>

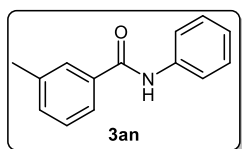

White solid, 92% yield, m.p. 129.2-129.5°C. <sup>1</sup>H-NMR (500 MHz, CDCl<sub>3</sub>) δ 7.78 (s, 1H), 7.69 (s, 1H), 7.64 (d,  $J = 7.7$  Hz, 3H), 7.40-7.34 (m, 4H), 7.21 – 7.15 (m, 1H), 2.44 (s, 3H). <sup>13</sup>C-NMR (126

MHz, CDCl<sub>3</sub>) δ 166.0, 138.6, 138.0, 134.9, 132.5, 129.0, 128.5, 127.8, 124.4, 123.9, 120.2, 21.3. HRMS (APCI):  $m/z$   $[M+H]^+$  calcd. for  $C_{14}H_{14}NO^+$ : 212.10699; found: 212.10658.

#### 2-Methyl-*N*-phenylbenzamide (3ao)<sup>48</sup>

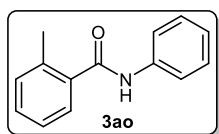

White solid, 73% yield, m.p. 127.3-127.6°C. <sup>1</sup>H-NMR (500 MHz, CDCl<sub>3</sub>) δ 7.77 (s, 1H), 7.59 (d,  $J = 7.9$  Hz, 2H), 7.39 (d,  $J = 6.8$  Hz, 1H), 7.37-7.30 (m, 3H), 7.27-7.17 (m, 2H), 7.13 (t,  $J = 7.5$  Hz, 1H), 2.44 (s, 3H). <sup>13</sup>C-NMR (126 MHz, CDCl<sub>3</sub>) δ 168.1, 138.0, 136.4, 136.3, 131.1, 130.1,

129.0, 126.6, 125.7, 124.4, 119.9, 19.7. HRMS (APCI):  $m/z$   $[M+H]^+$  calcd. for  $C_{14}H_{14}NO^+$ : 212.10699; found: 212.10655.

### ***N*-Phenylpicolinamide (3ap)<sup>69</sup>**

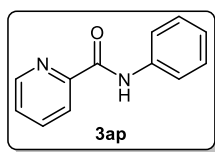

White solid, 98% yield, m.p. 76.7-77.8°C. <sup>1</sup>H-NMR (500 MHz, CDCl<sub>3</sub>) δ 10.03 (s, 1H), 8.62 (d, *J* = 4.7 Hz, 1H), 8.31 (d, *J* = 7.8 Hz, 1H), 7.91 (t, *J* = 7.7 Hz, 1H), 7.79 (d, *J* = 8.0 Hz, 2H), 7.52 – 7.45 (m, 1H), 7.39 (t, *J* = 7.3 Hz, 2H), 7.19 – 7.12 (m, 1H). <sup>13</sup>C-NMR (126 MHz, CDCl<sub>3</sub>) δ 162.0, 149.9, 148.0, 137.8, 137.7, 129.1, 126.5, 124.3, 122.4, 119.7. HRMS (APCI): *m/z* [M+H]<sup>+</sup> calcd. for C<sub>12</sub>H<sub>11</sub>N<sub>2</sub>O<sup>+</sup>: 199.08659; found: 199.08618.

### ***N*-Phenylpyrazine-2-carboxamide (3aq)<sup>70</sup>**

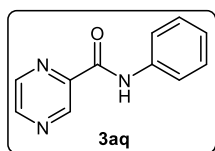

White solid, 90% yield, m.p. 126.8-128.1°C. <sup>1</sup>H-NMR (500 MHz, CDCl<sub>3</sub>) δ 9.67 (s, 1H), 9.52 (s, 1H), 8.81 (s, 1H), 8.59 (s, 1H), 7.76 (d, *J* = 7.9 Hz, 2H), 7.40 (t, *J* = 7.8 Hz, 2H), 7.18 (t, *J* = 7.4 Hz, 1H). <sup>13</sup>C-NMR (126 MHz, CDCl<sub>3</sub>) δ 160.6, 147.5, 144.7, 144.4, 142.4, 137.2, 129.2, 124.9, 119.8. HRMS (APCI): *m/z* [M+H]<sup>+</sup> calcd. for C<sub>11</sub>H<sub>10</sub>N<sub>3</sub>O<sup>+</sup>: 200.08184; found: 200.08160.

### ***N*-Phenylfuran-2-carboxamide (3ar)<sup>69</sup>**

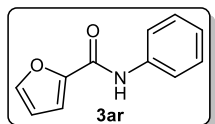

White solid, 95% yield, m.p. 121.8-122.6°C. <sup>1</sup>H-NMR (500 MHz, CDCl<sub>3</sub>) δ 8.06 (s, 1H), 7.65 (d, *J* = 8.0 Hz, 2H), 7.52 (s, 1H), 7.37 (t, *J* = 7.7 Hz, 2H), 7.25 (d, *J* = 3.5 Hz, 1H), 7.15 (t, *J* = 7.4 Hz, 1H), 6.57 (dd, *J* = 3.4, 1.7 Hz, 1H). <sup>13</sup>C-NMR (126 MHz, CDCl<sub>3</sub>) δ 156.1, 147.8, 144.2, 137.4, 129.1, 124.5, 119.9, 115.3, 112.7. HRMS (APCI): *m/z* [M+H]<sup>+</sup> calcd. for C<sub>11</sub>H<sub>10</sub>NO<sub>2</sub><sup>+</sup>: 188.07060; found: 188.07018.

### ***N*-Phenylcyclopropanecarboxamide (3as)<sup>71</sup>**

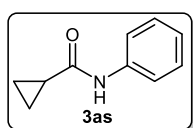

White solid, 73% yield, m.p. 113.9-114.1°C. <sup>1</sup>H-NMR (500 MHz, CDCl<sub>3</sub>) δ 7.51 (d, *J* = 7.9 Hz, 2H), 7.36 (s, 1H), 7.31 (t, *J* = 7.7 Hz, 2H), 7.09 (t, *J* = 7.6 Hz, 1H), 1.49 (s, 1H), 1.09 (dq, *J* = 7.8, 4.0 Hz, 2H), 0.85 (dq, *J* = 7.4, 4.2 Hz, 2H). <sup>13</sup>C-NMR (126 MHz, CDCl<sub>3</sub>) δ 172.1, 138.1, 128.9,

124.0, 119.8, 15.7, 7.9. HRMS (APCI):  $m/z$   $[M+H]^+$  calcd. for  $C_{10}H_{12}NO^+$ : 162.09134; found: 162.09102.

### ***N*-Phenylcyclohexanecarboxamide (3at)<sup>72</sup>**

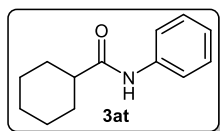

White solid, 80% yield, m.p. 147.0-148.4°C. <sup>1</sup>H-NMR (500 MHz, CDCl<sub>3</sub>) δ 7.52 (d,  $J$  = 8.0 Hz, 2H), 7.31 (t,  $J$  = 7.1 Hz, 2H), 7.13 (s, 1H), 7.09 (t,  $J$  = 7.4 Hz, 1H), 2.27 – 2.17 (m, 1H), 2.00 – 1.92 (m, 2H), 1.87 – 1.79 (m, 2H), 1.74 – 1.66 (m, 1H), 1.56 – 1.49 (m, 2H), 1.36 – 1.22 (m, 3H). <sup>13</sup>C-NMR (126 MHz, CDCl<sub>3</sub>) δ 174.3, 138.1, 129.0, 124.1, 119.7, 46.6, 29.7, 25.7. HRMS (APCI):  $m/z$   $[M+H]^+$  calcd. for  $C_{13}H_{18}NO^+$ : 204.13829; found: 204.13791.

### ***N*-Phenylacetamide (3au)<sup>71</sup>**

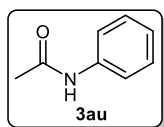

White solid, 95% yield, m.p. 114.8-116.0°C. <sup>1</sup>H-NMR (500 MHz, CDCl<sub>3</sub>) δ 7.62 – 7.45 (m, 3H), 7.30 (t,  $J$  = 7.4 Hz, 2H), 7.10 (t,  $J$  = 7.4 Hz, 1H), 2.16 (s, 3H). <sup>13</sup>C-NMR (126 MHz, CDCl<sub>3</sub>) δ 168.5, 137.9, 129.0, 124.3, 120.0, 24.6. HRMS (APCI):  $m/z$   $[M+H]^+$  calcd. for  $C_8H_{10}NO^+$ : 136.07569; found: 136.07558.

### ***N*-Phenyldecanamide (3av)<sup>73</sup>**

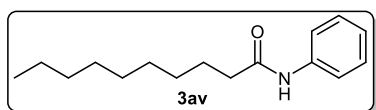

White solid, 96% yield, m.p. 67.7-67.8°C. <sup>1</sup>H-NMR (500 MHz, CDCl<sub>3</sub>) δ 7.51 (d,  $J$  = 8.0 Hz, 2H), 7.30 (t,  $J$  = 7.7 Hz, 2H), 7.26 (s, 1H), 7.09 (t,  $J$  = 7.5 Hz, 1H), 2.34 (t,  $J$  = 7.6 Hz, 2H), 1.72 (q,  $J$  = 7.4 Hz, 2H), 1.40 – 1.21 (m, 12H), 0.87 (t,  $J$  = 6.8 Hz, 3H). <sup>13</sup>C-NMR (126 MHz, CDCl<sub>3</sub>) δ 171.5, 138.0, 129.0, 124.2, 119.8, 37.9, 31.9, 29.5, 29.4, 29.3, 25.7, 22.7, 14.1. HRMS (APCI):  $m/z$   $[M+H]^+$  calcd. for  $C_{16}H_{26}NO^+$ : 248.20089; found: 248.20047.

### **4-Chloro-*N*-(2-morpholinoethyl)benzamide (Moclobemide, 3aw)<sup>48</sup>**

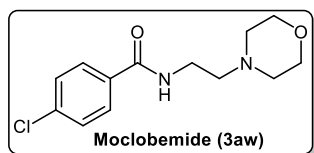

White solid, 99% yield, m.p. 139.5-140.4°C. <sup>1</sup>H-NMR (500 MHz, CDCl<sub>3</sub>) δ 7.71 (d,  $J$  = 8.1 Hz, 2H), 7.41 (d,  $J$  = 8.1 Hz, 2H), 6.77 (s, 1H), 3.72 (t,  $J$  = 4.6 Hz, 4H), 3.53 (q,  $J$  = 5.6

Hz, 2H), 2.59 (t,  $J = 6.0$  Hz, 2H), 2.50 (t,  $J = 4.8$  Hz, 4H).  $^{13}\text{C}$ -NMR (126 MHz,  $\text{CDCl}_3$ )  $\delta$  166.3, 137.6, 133.0, 128.8, 128.4, 67.0, 56.8, 53.3, 36.1. HRMS (APCI):  $m/z$   $[\text{M}+\text{H}]^+$  calcd. for  $\text{C}_{13}\text{H}_{18}\text{ClN}_2\text{O}_2^+$ : 269.10513; found: 269.10458.

### 2-Iodo-*N*-phenylbenzamide (Benodanil, 3ax)<sup>74</sup>

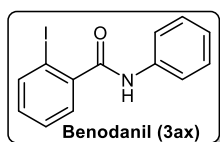

White solid, 85% yield, m.p. 141.8-143.1°C.  $^1\text{H}$ -NMR (500 MHz,  $\text{CDCl}_3$ )  $\delta$  7.88 (d,  $J = 8.0$  Hz, 1H), 7.63 (d,  $J = 8.3$  Hz, 3H), 7.49 (d,  $J = 7.6$  Hz, 1H), 7.41-7.31 (m, 3H), 7.17 (t,  $J = 7.4$  Hz, 1H), 7.12 (t,  $J = 7.7$  Hz, 1H).  $^{13}\text{C}$ -NMR (126 MHz,  $\text{CDCl}_3$ )  $\delta$  167.2, 142.1, 140.0, 137.5, 131.4, 129.1, 128.5, 128.3, 124.9, 120.1, 92.3. HRMS (APCI):  $m/z$   $[\text{M}+\text{H}]^+$  calcd. for  $\text{C}_{13}\text{H}_{11}\text{INO}^+$ : 323.98798; found: 323.98734.

### 2-Methyl-*N*-phenylfuran-3-carboxamide (Fenfuram, 3ay)<sup>10</sup>

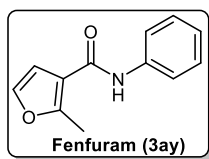

White solid, 75% yield, m.p. 112.0-113.4°C.  $^1\text{H}$ -NMR (500 MHz,  $\text{CDCl}_3$ )  $\delta$  7.57 (d,  $J = 7.9$  Hz, 2H), 7.48 – 7.38 (m, 1H), 7.38 – 7.32 (m, 2H), 7.30 (t,  $J = 2.7$  Hz, 1H), 7.13 (t,  $J = 7.4$  Hz, 1H), 6.54 (s, 1H), 2.64 (s, 3H).  $^{13}\text{C}$ -NMR (126 MHz,  $\text{CDCl}_3$ )  $\delta$  162.0, 158.0, 140.6, 137.8, 129.0, 124.4, 120.2, 120.2, 115.8, 108.2, 108.1, 13.6. HRMS (APCI):  $m/z$   $[\text{M}+\text{H}]^+$  calcd. for  $\text{C}_{12}\text{H}_{12}\text{NO}_2^+$ : 202.08626; found: 202.08583.

### References:

1. C. Han, J. P. Lee, E. Lobkovsky and J. A. Porco, *J. Am. Chem. Soc.*, 2005, **127**, 10039-10044.
2. B. Gnanaprakasam and D. Milstein, *J. Am. Chem. Soc.*, 2011, **133**, 1682-1685.
3. J. Lee, S. Muthaiah and S. H. Hong, *Adv. Synth. Catal.*, 2014, **356**, 2653-2660.
4. H. Morimoto, R. Fujiwara, Y. Shimizu, K. Morisaki and T. Ohshima, *Org. Lett.*, 2014, **16**, 2018-2021.
5. Q. Han, X. Xiong and S. Li, *Catal. Commun.*, 2015, **58**, 85-88.
6. D. C. Lenstra, D. T. Nguyen and J. Mecinović, *Tetrahedron*, 2015, **71**, 5547-5553.

7. S. Sultan, M. Kumar, S. Devari, D. Mukherjee and B. Ali Shah, *ChemCatChem*, 2016, **8**, 703-707.
8. L. Hie, N. F. Fine Nathel, X. Hong, Y. F. Yang, K. N. Houk and N. K. Garg, *Angew. Chem. Int. Ed.*, 2016, **55**, 2810-2814.
9. C. W. Cheung, M. L. Ploeger and X. Hu, *Nat. Commun.*, 2017, **8**, 14878.
10. T. Ben Halima, J. Masson-Makdissi and S. G. Newman, *Angew. Chem., Int. Ed.*, 2018, **57**, 12925-12929.
11. Y. L. Zheng and S. G. Newman, *ACS Catal.*, 2019, **9**, 4426-4433.
12. L. Ling, C. Chen, M. Luo and X. Zeng, *Org. Lett.*, 2019, **21**, 1912-1916.
13. C. W. Cheung, N. Shen, S. P. Wang, A. Ullah, X. L. Hu and J. A. Ma, *Org. Chem. Front.*, 2019, **6**, 756-761.
14. M. N. Rashed, K. Masuda, T. Ichitsuka, N. Koumura, K. Sato and S. Kobayashi, *Adv. Synth. Catal.*, 2021, DOI: 10.1002/adsc.202001496.
15. Z. Fu, X. Wang, S. Tao, Q. Bu, D. Wei and N. Liu, *J. Org. Chem.*, 2021, **86**, 2339-2358.
16. C. Sabot, K. A. Kumar, S. Meunier and C. Mioskowski, *Tetrahedron Lett.*, 2007, **48**, 3863-3866.
17. X. Yang and V. B. Birman, *Org. Lett.*, 2009, **11**, 1499-1502.
18. K. E. Price, C. Larrivéé-Aboussafy, B. M. Lillie, R. W. McLaughlin, J. Mustakis, K. W. Hettenbach, J. M. Hawkins and R. Vaidyanathan, *Org. Lett.*, 2009, **11**, 2003-2006.
19. N. Caldwell, C. Jamieson, I. Simpson and T. Tuttle, *Org. Lett.*, 2013, **15**, 2506-2509.
20. N. Caldwell, C. Jamieson, I. Simpson and A. J. Watson, *Chem. Commun.*, 2015, **51**, 9495-9498.
21. D. D. Sanz Sharley and J. M. J. Williams, *Chem. Commun.*, 2017, **53**, 2020-2023.
22. M. Movassaghi and M. A. Schmidt, *Org. Lett.*, 2005, **7**, 2453-2456.
23. H. Guo, Y. Wang, G.-F. Du, B. Dai and L. He, *Tetrahedron*, 2015, **71**, 3472-3477.

24. V. M. de Oliveira, R. Silva de Jesus, A. F. Gomes, F. C. Gozzo, A. P. Umpierre, P. A. Z. Suarez, J. C. Rubim and B. A. D. Neto, *ChemCatChem*, 2011, **3**, 1911-1920.
25. R. Fu, Y. Yang, Y. Ma, F. Yang, J. Li, W. Chai, Q. Wang and R. Yuan, *Tetrahedron Lett.*, 2015, **56**, 4527-4531.
26. R. Arora, S. Paul and R. Gupta, *Can. J. Chem.*, 2005, **83**, 1137-1140.
27. V. R. Chintareddy, H. A. Ho, A. D. Sadow and J. G. Verkade, *Tetrahedron Lett.*, 2011, **52**, 6523-6529.
28. M. A. Ali, S. Siddiki, K. Kon and K. Shimizu, *ChemCatChem*, 2015, **7**, 2705-2710.
29. Z. Li, C. Wang, Y. R. Wang, D. Yuan and Y. M. Yao, *Asian J. Org. Chem.*, 2018, **7**, 810-814.
30. T. Nuijens, C. Cusan, J. A. W. Kruijtzter, D. T. S. Rijkers, R. M. J. Liskamp and P. J. L. M. Quaedflieg, *J. Org. Chem.*, 2009, **74**, 5145-5150.
31. K. M. Whitten, A. Makriyannis and S. K. Vadivel, *Tetrahedron Lett.*, 2012, **53**, 5753-5755.
32. J. G. Hernández, K. J. Ardila-Fierro, D. Crawford, S. L. James and C. Bolm, *Green Chem.*, 2017, **19**, 2620-2625.
33. A. Basha, M. Lipton and S. M. Weinreb, *Tetrahedron Lett.*, 1977, **18**, 4171-4172.
34. W. B. Wang and E. J. Roskamp, *J. Org. Chem.*, 1992, **57**, 6101-6103.
35. K. Ishihara, Y. Kuroki, N. Hanaki, S. Ohara and H. Yamamoto, *J. Am. Chem. Soc.*, 1996, **118**, 1569-1570.
36. R. S. Varma and K. P. Naicker, *Tetrahedron Lett.*, 1999, **40**, 6177-6180.
37. T. Ooi, E. Tayama, M. Yamada and K. Maruoka, *Synlett*, 1999, **6**, 729-730.
38. Z. Guo, E. D. Dowdy, W.-S. Li, R. Polniaszek and E. Delaney, *Tetrahedron Lett.*, 2001, **42**, 1843-1845.
39. B. C. Ranu and P. Dutta, *Synth. Commun.*, 2003, **33**, 297-301.
40. A. Novak, L. D. Humphreys, M. D. Walker and S. Woodward, *Tetrahedron Lett.*, 2006, **47**, 5767-5769.
41. T. Gustafsson, F. Pontén and P. H. Seeberger, *Chem. Commun.*, 2008, 1100-1102.



42. X. Tang, D. Rawson and S. Woodward, *Synlett*, 2010, **2010**, 636-638.
43. J. B. Campbell, R. B. Sparks and R. F. Dedinas, *Synlett*, 2011, **2011**, 357-360.
44. J. D. M. Muñoz, J. Alcázar, A. de la Hoz, Á. Díaz-Ortiz and S. A. Alonso de Diego, *Green Chem.*, 2012, **14**, 1335-1341.
45. T. Ohshima, Y. Hayashi, K. Agura, Y. Fujii, A. Yoshiyama and K. Mashima, *Chem. Commun.*, 2012, **48**, 5434-5436.
46. B. R. Kim, H. G. Lee, S. B. Kang, G. H. Sung, J. J. Kim, J. K. Park, S. G. Lee and Y. J. Yoon, *Synthesis*, 2012, **44**, 42-50.
47. N. Caldwell, C. Jamieson, I. Simpson and A. J. B. Watson, *ACS Sustainable Chem. Eng.*, 2013, **1**, 1339-1344.
48. G. C. Li, C. L. Ji, X. Hong and M. Szostak, *J. Am. Chem. Soc.*, 2019, **141**, 11161-11172.
49. C. W. Cheung, J. A. Ma and X. I. Hu, *J. Am. Chem. Soc.*, 2018, **140**, 6789-6792.
50. J. B. Peng, D. Li, H. Q. Geng and X. F. Wu, *Org. Lett.*, 2019, **21**, 4878-4881.
51. A. V. Iosub and S. S. Stahl, *J. Am. Chem. Soc.*, 2015, **137**, 3454-3457.
52. F. Xiao, Y. Liu, C. Tang and G.-J. Deng, *Org. Lett.*, 2012, **14**, 984-987.
53. G. Hong, S. Wu, X. Zhu, D. Mao and L. Wang, *Tetrahedron*, 2016, **72**, 436-441.
54. T. T. S. Lew, D. S. W. Lim and Y. Zhang, *Green Chem.*, 2015, **17**, 5140-5143.
55. Z. Y. Tian and C. P. Zhang, *Chem. Commun.*, 2019, **55**, 11936-11939.
56. Z. Zhang, X. Li, Y. Li, Y. Guo, X. Zhao, Y. Yan, K. Sun and G. Zhang, *Tetrahedron*, 2019, **75**, 3628-3635.
57. Z. Chen, X. Wen, Y. Qian, P. Liang, B. Liu and M. Ye, *Org. Biomol. Chem.*, 2018, **16**, 1247-1251.
58. S. S. Kulkarni, X. Hu and R. Manetsch, *Chem. Commun.*, 2013, **49**, 1193-1195.
59. L. Hu, S. Xu, Z. Zhao, Y. Yang, Z. Peng, M. Yang, C. Wang and J. Zhao, *J. Am. Chem. Soc.*, 2016, **138**, 13135-13138.
60. H. Cheng, M. Q. Xiong, C. X. Cheng, H. J. Wang, Q. Lu, H. F. Liu, F. B. Yao, C. Chen and F. Verpoort, *Chem. - Asian J.*, 2018, **13**, 440-448.
61. S. Liu, H. Wang, X. Dai and F. Shi, *Green Chem.*, 2018, **20**, 3457-3462.
62. S. K. Mangawa, S. K. Bagh, K. Sharma and S. K. Awasthi, *Tetrahedron Lett.*,

- 2015, **56**, 1960-1963.
63. D. S. MacMillan, J. Murray, H. F. Sneddon, C. Jamieson and A. J. B. Watson, *Green Chem.*, 2013, **15**, 596-600.
  64. A. H. Dardir, P. R. Melvin, R. M. Davis, N. Hazari and M. Mohadjer Beromi, *J. Org. Chem.*, 2018, **83**, 469-477.
  65. Y. C. Yuan, R. Kamaraj, C. Bruneau, T. Labasque, T. Roisnel and R. Gramage-Doria, *Org. Lett.*, 2017, **19**, 6404-6407.
  66. J. d. M. Muñoz, J. Alcázar, A. de la Hoz, Á. Díaz-Ortiz and S.-A. Alonso de Diego, *Green Chem.*, 2012, **14**, 1335-1341.
  67. L. Ma, Y. Li and Z. Li, *Sci. China: Chem.*, 2015, **58**, 1310-1315.
  68. T. W. Bousfield, K. P. R. Pearce, S. B. Nyamini, A. Angelis-Dimakis and J. E. Camp, *Green Chem.*, 2019, **21**, 3675-3681.
  69. L. Zhang, W. Wang, A. Wang, Y. Cui, X. Yang, Y. Huang, X. Liu, W. Liu, J. Y. Son, H. Oji and T. Zhang, *Green Chem.*, 2013, **15**, 2680-2684.
  70. Q. Li, S. Y. Zhang, G. He, Z. Ai, W. A. Nack and G. Chen, *Org. Lett.*, 2014, **16**, 1764-1767.
  71. F. Ma, X. Xie, L. Zhang, Z. Peng, L. Ding, L. Fu and Z. Zhang, *J. Org. Chem.*, 2012, **77**, 5279-5285.
  72. C. K. Liu, M. Y. Chen, X. X. Lin, Z. Fang and K. Guo, *Green Chem.*, 2020, **22**, 6437-6443.
  73. R. Zhang, J. C. Zhang, W. Y. Zhang, Y. Q. He, H. Cheng, C. Chen and Y. C. Gu, *Synthesis*, 2020, **52**, 3286-3294.
  74. F. Ke, Y. Xu, S. Zhu, X. Lin, C. Lin, S. Zhou and H. Su, *Green Chem.*, 2019, **21**, 4329-4333.

## 6. Original $^1\text{H-NMR}$ , $^{13}\text{C-NMR}$ and HR-MS spectra for 3a-3ay

### ➤ $^1\text{H-NMR}$ spectrum for 3a

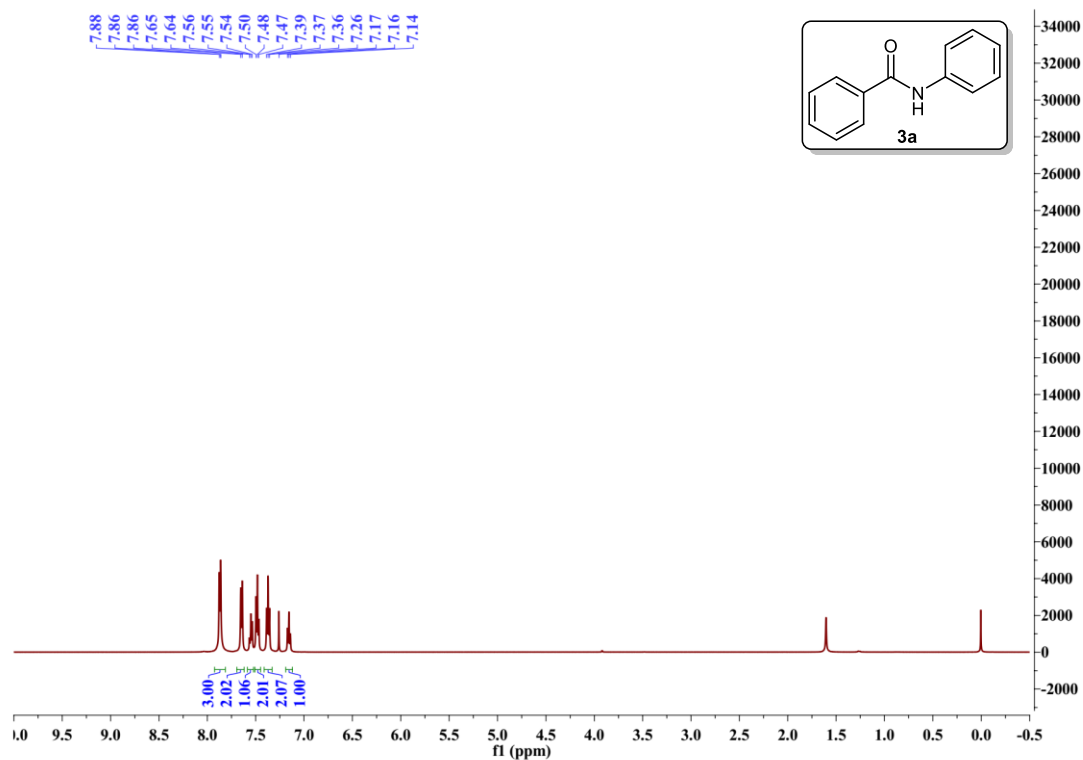

### ➤ $^{13}\text{C-NMR}$ spectrum for 3a

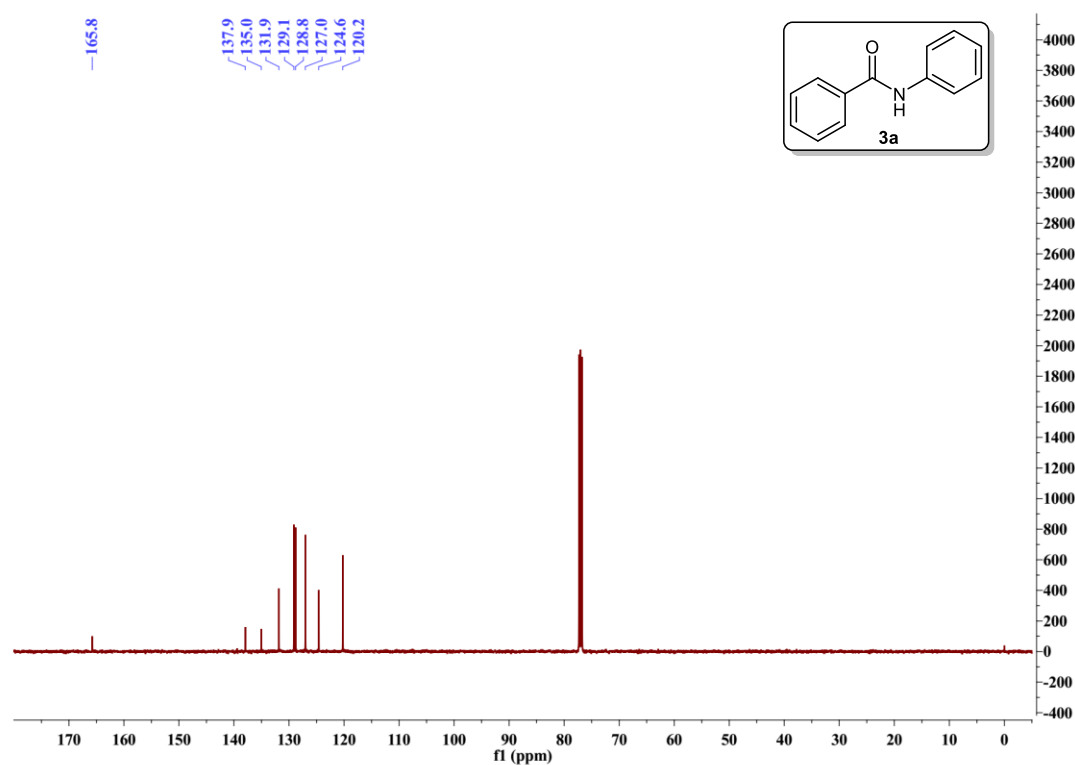

➤ HRMS spectrum for **3a**

35 #19 RT: 0.21 AV: 1 NL: 3.86E9  
T: FTMS + c APCI corona Full ms [60.0000-900.0000]

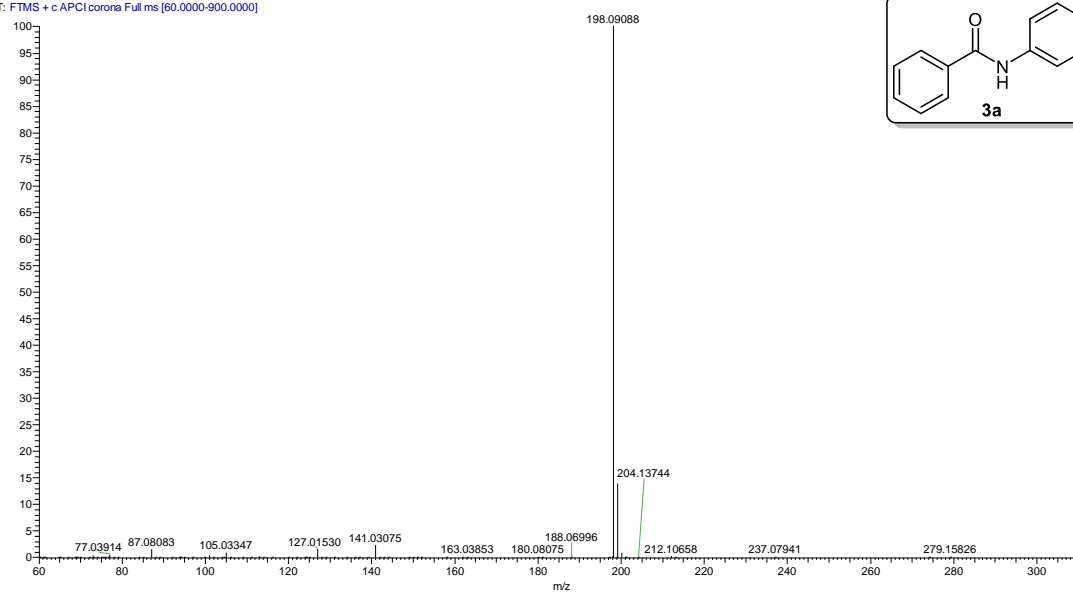

➤ <sup>1</sup>H-NMR spectrum for **3b**

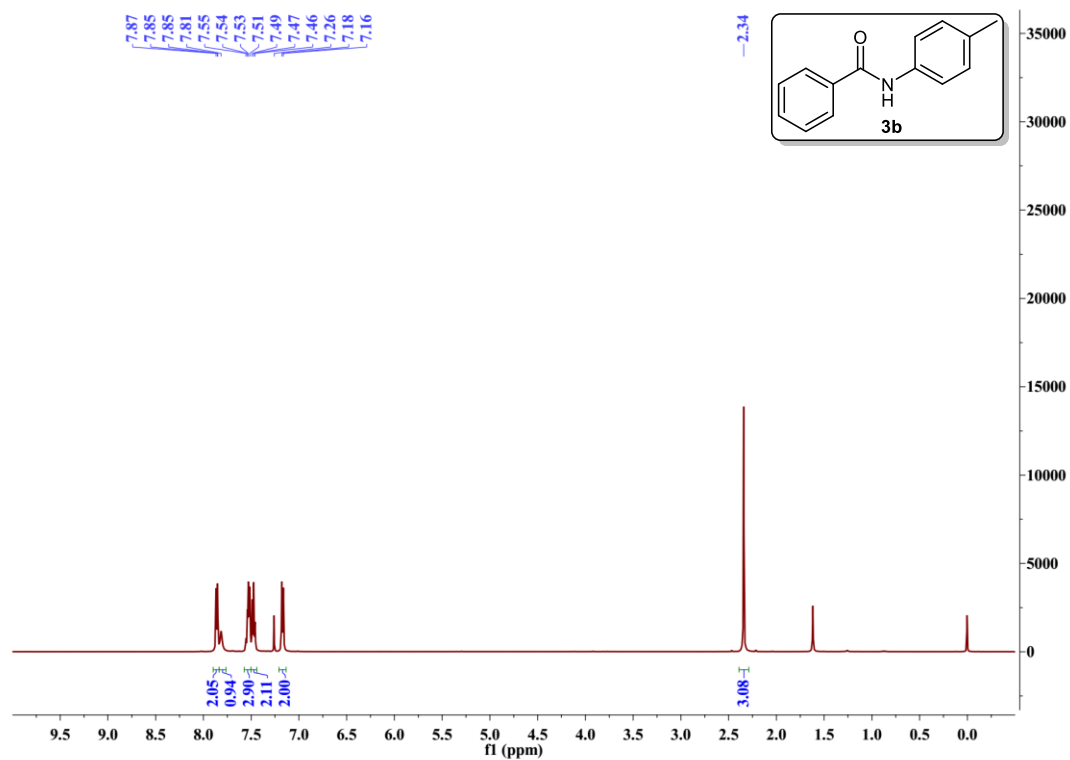

➤ <sup>13</sup>C-NMR spectrum for **3b**

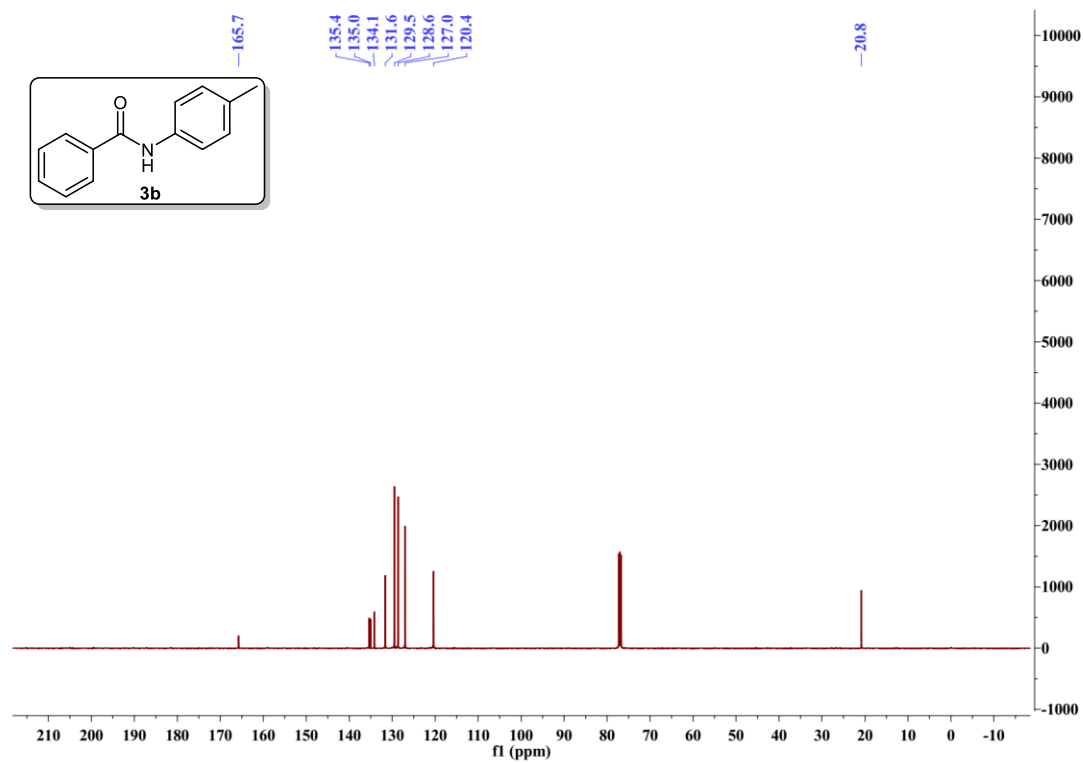

➤ HRMS spectrum for **3b**

2 #21 RT: 0.23 AV: 1 NL: 1.58E9  
T: FTMS + c APCI corona Full ms [60.0000-900.0000]

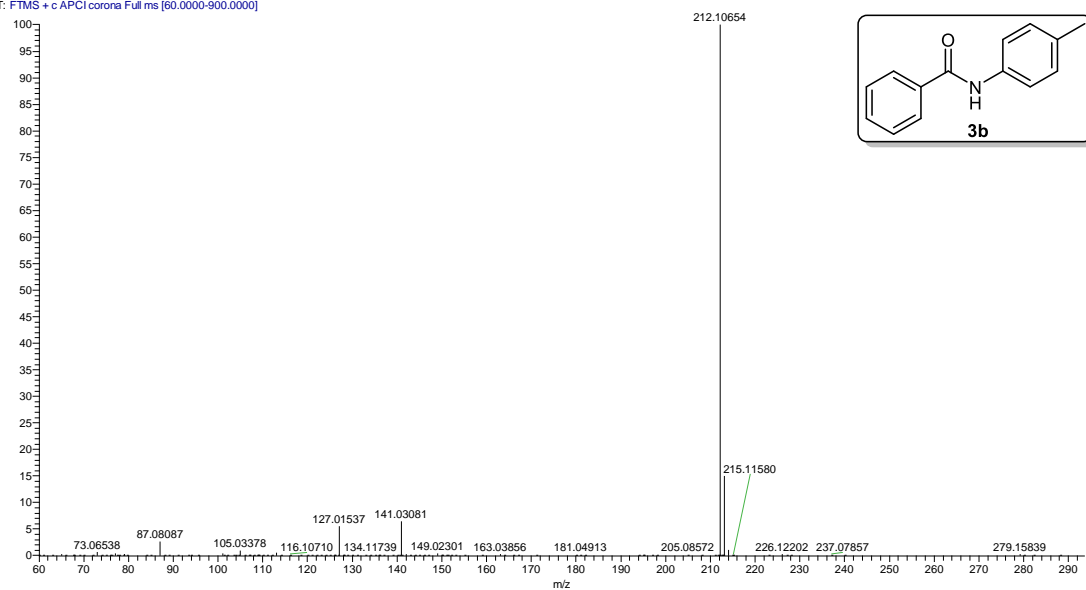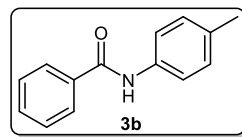

➤ <sup>1</sup>H-NMR spectrum for **3c**

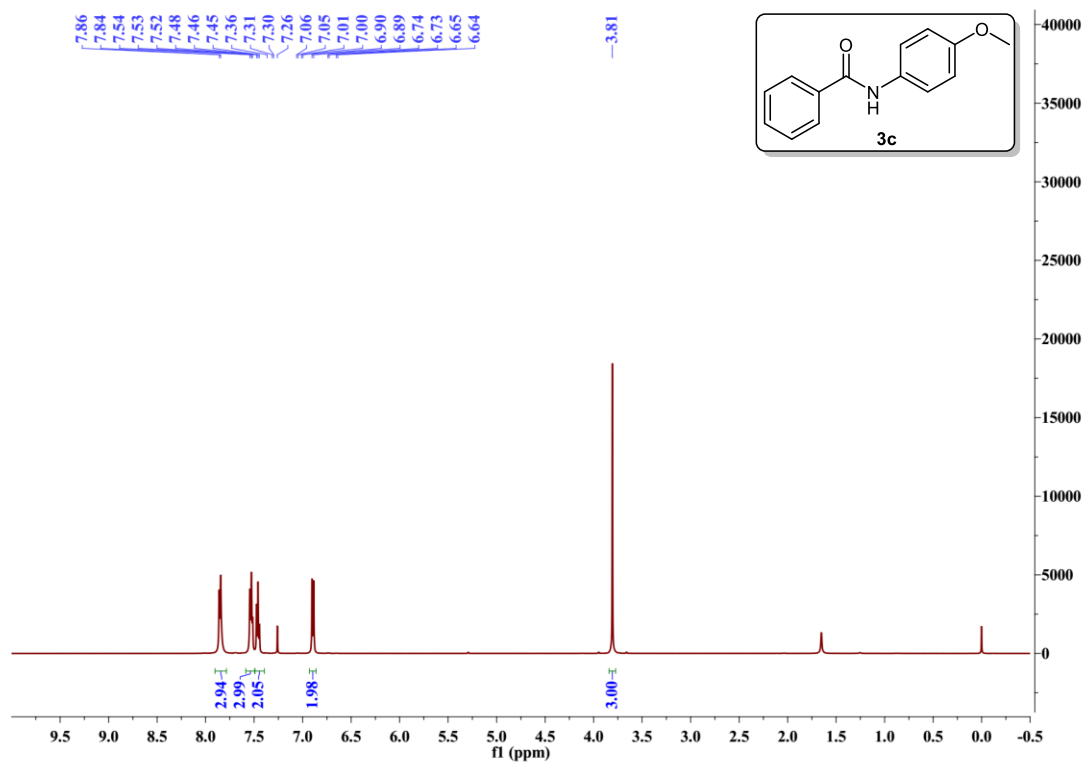

➤ <sup>13</sup>C-NMR spectrum for **3c**

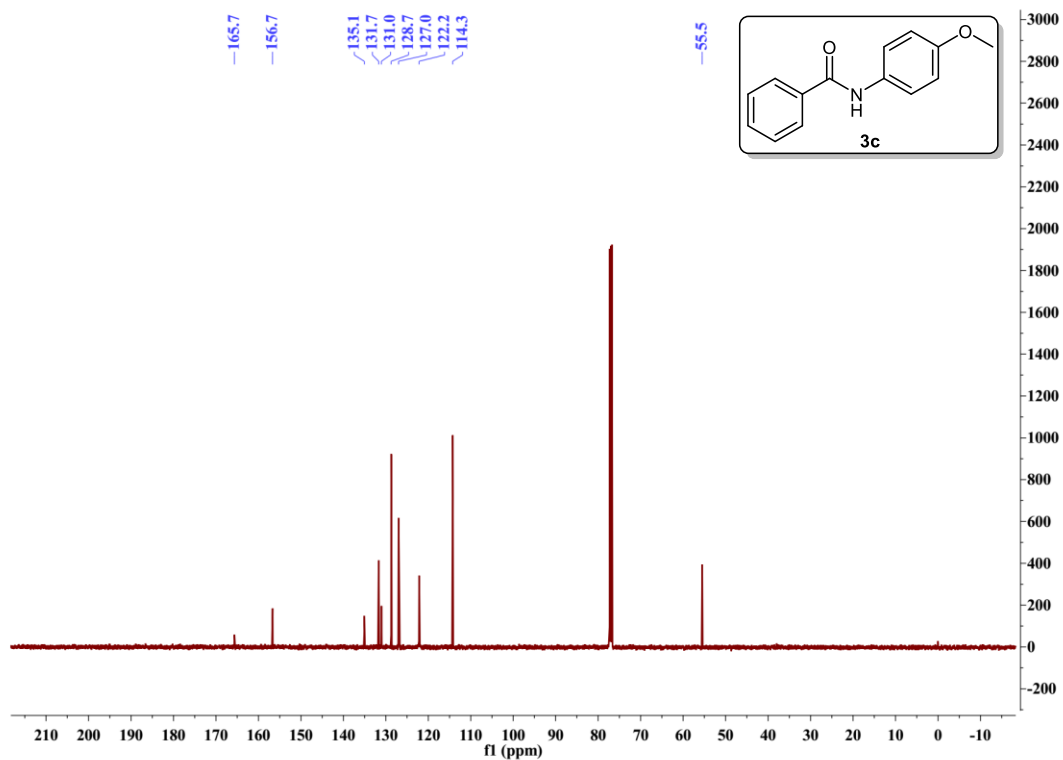

➤ HRMS spectrum for **3c**

1 #19 RT: 0.21 AV: 1 NL: 1.73E9  
T: FTMS + c APCI corona Full ms [60.0000-900.0000]

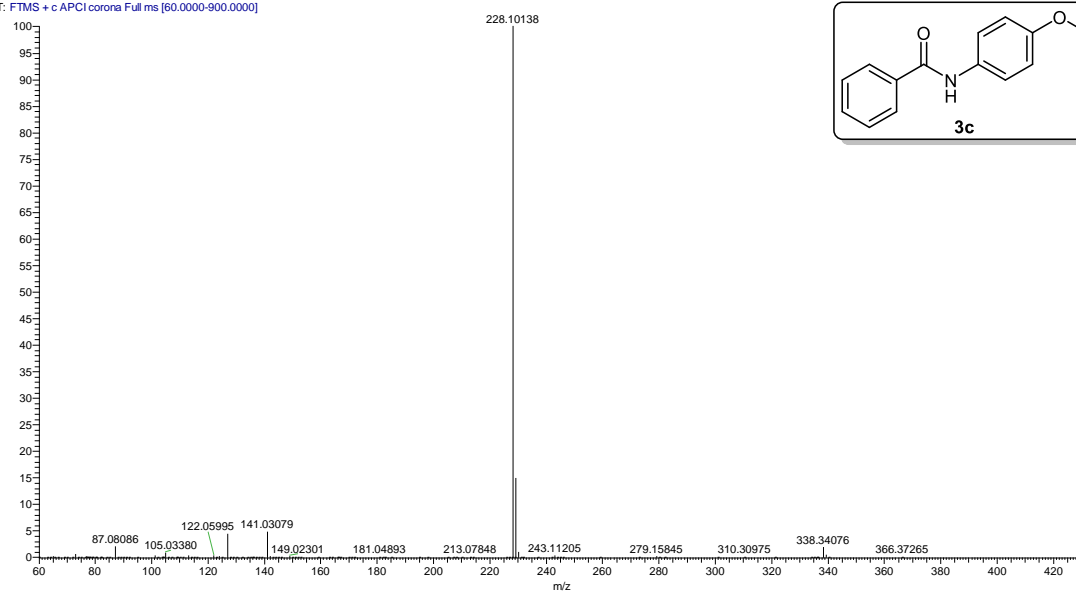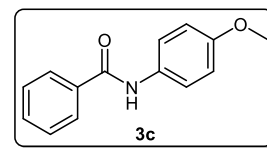



➤ <sup>1</sup>H-NMR spectrum for **3d**

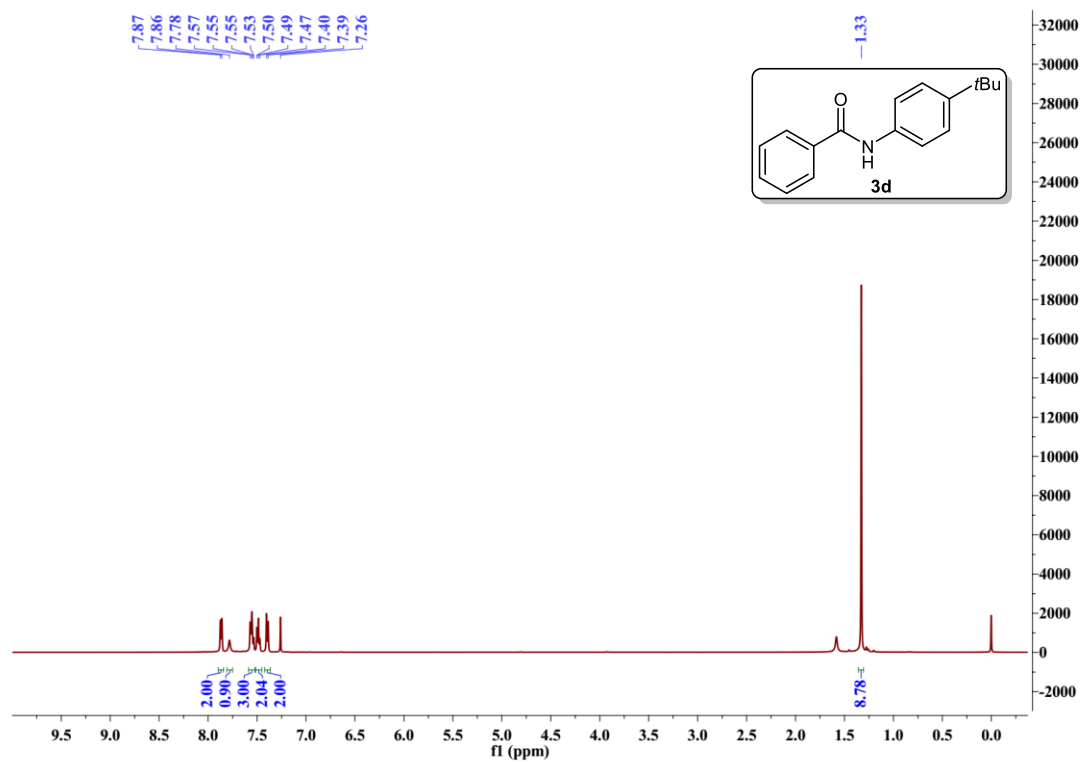

➤ <sup>13</sup>C-NMR spectrum for **3d**

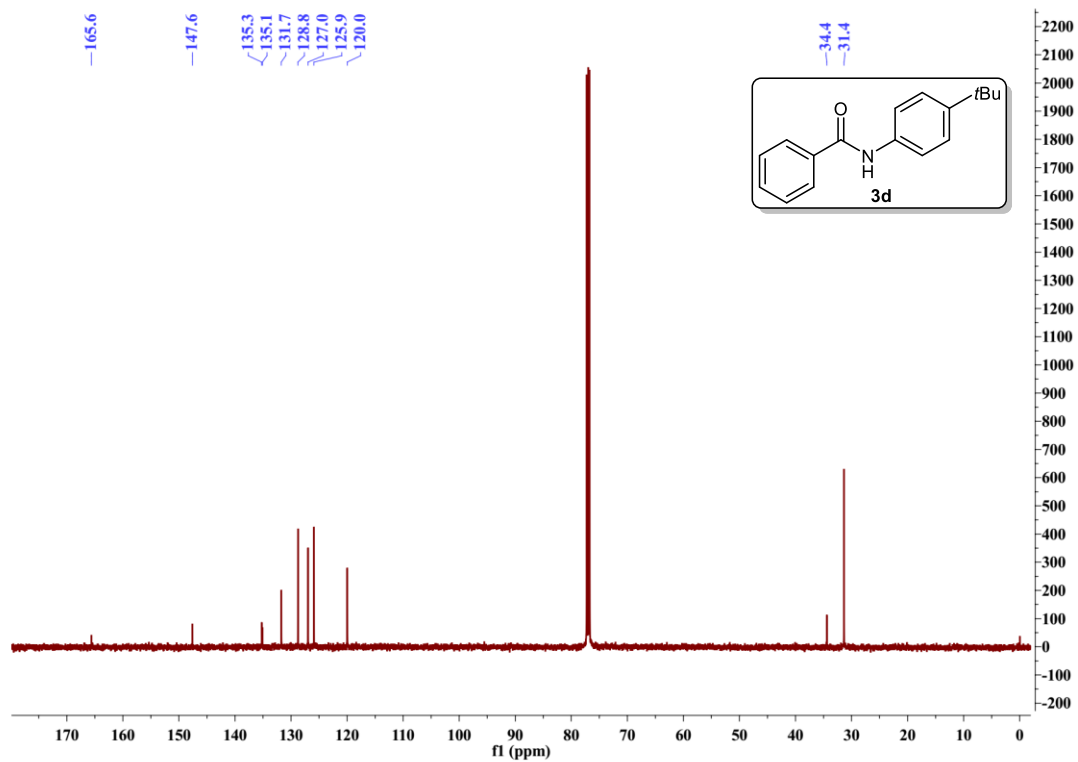

➤ HRMS spectrum for **3d**

18\_20201201074623 #26 RT: 0.25 AV: 1 NL: 1.63E9  
T: FTMS + c ESI Full ms [60.0000-900.0000]

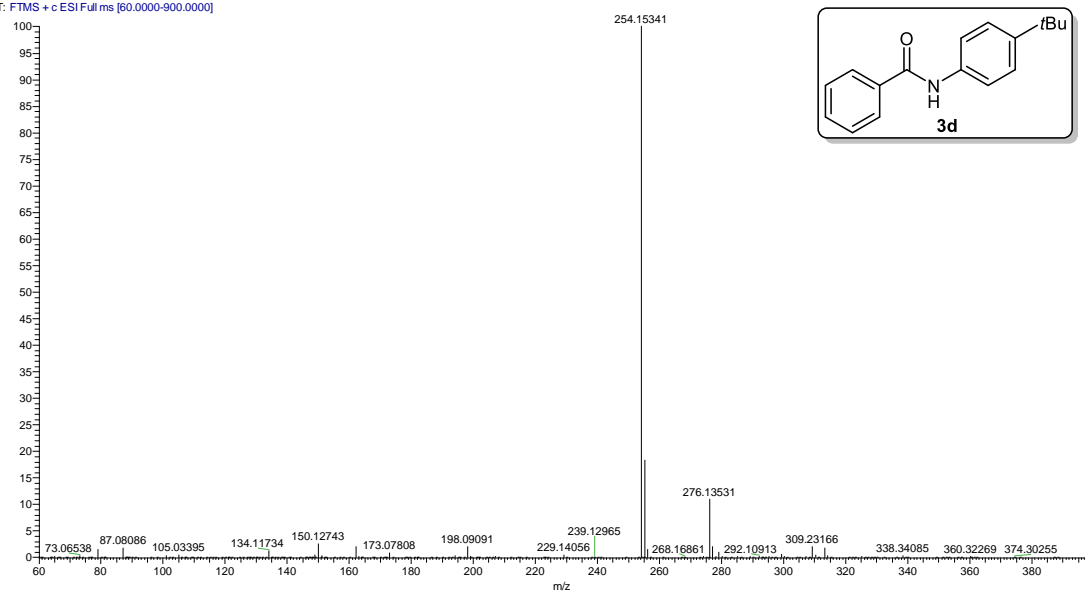

➤ <sup>1</sup>H-NMR spectrum for **3e**

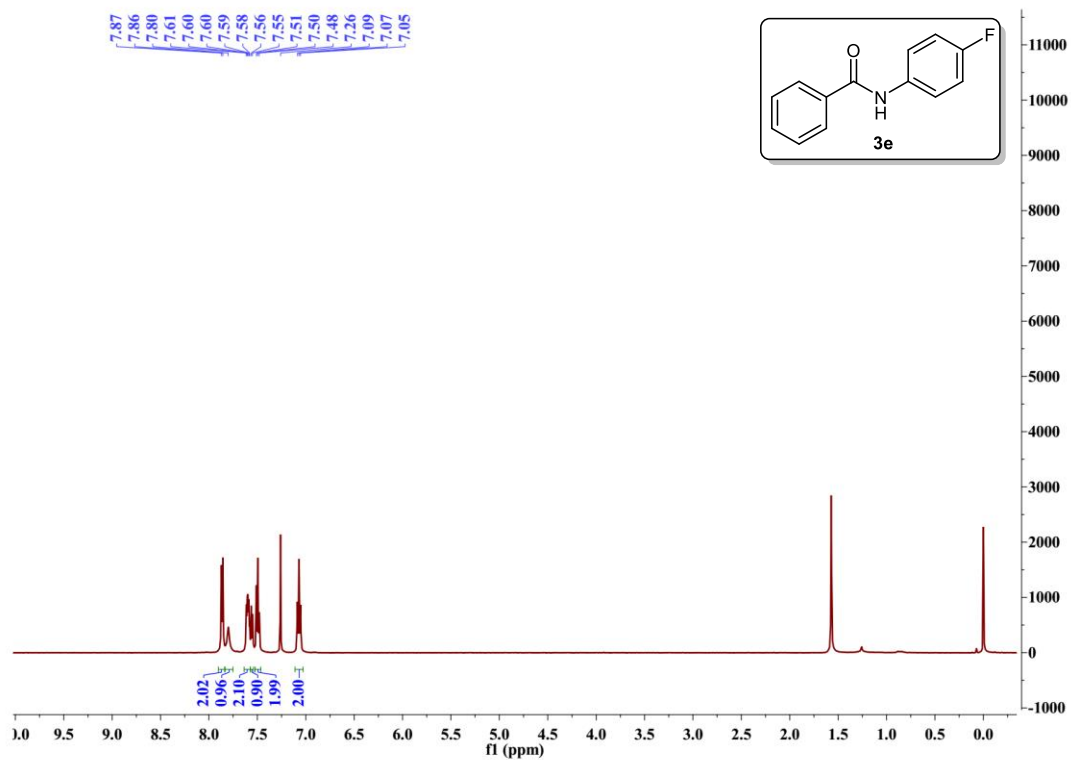

➤ <sup>13</sup>C-NMR spectrum for **3e**

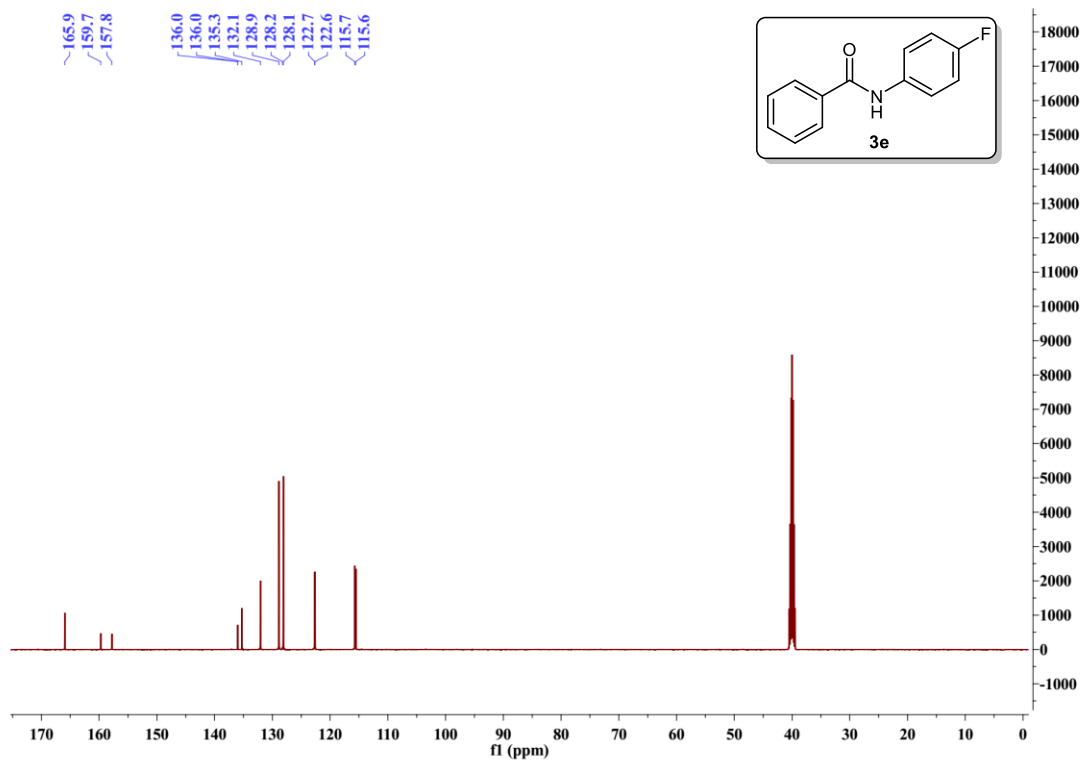

➤ HRMS spectrum for **3e**

4 #19 RT: 0.22 AV: 1 SB: 14 0.71-0.86 NL: 4.01E8  
T: FTMS + c APCI corona Full ms [60.0000-900.0000]

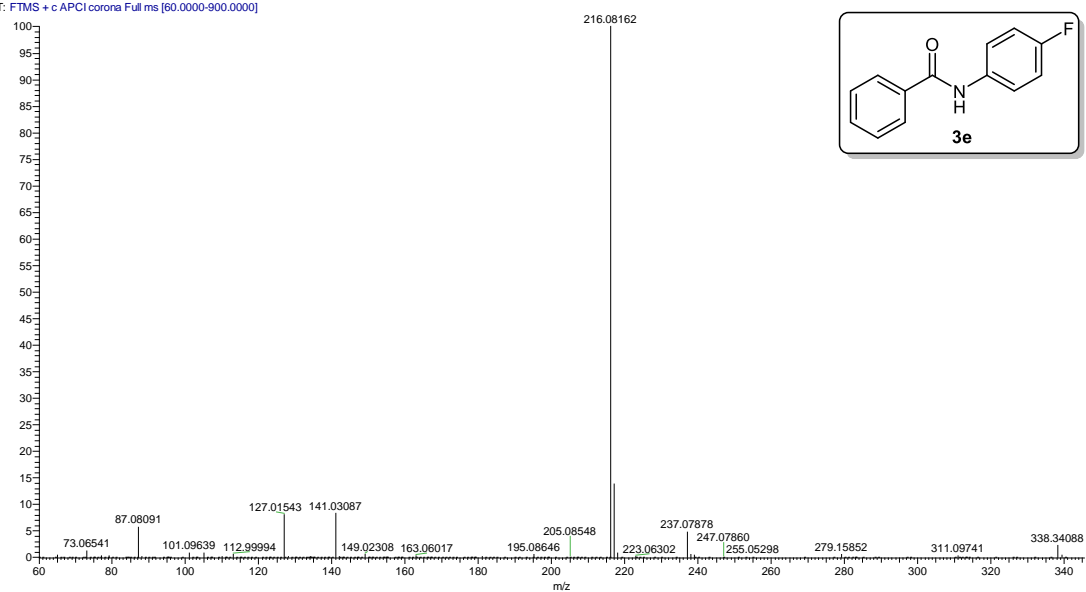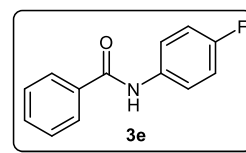

➤  $^1\text{H-NMR}$  spectrum for **3f**

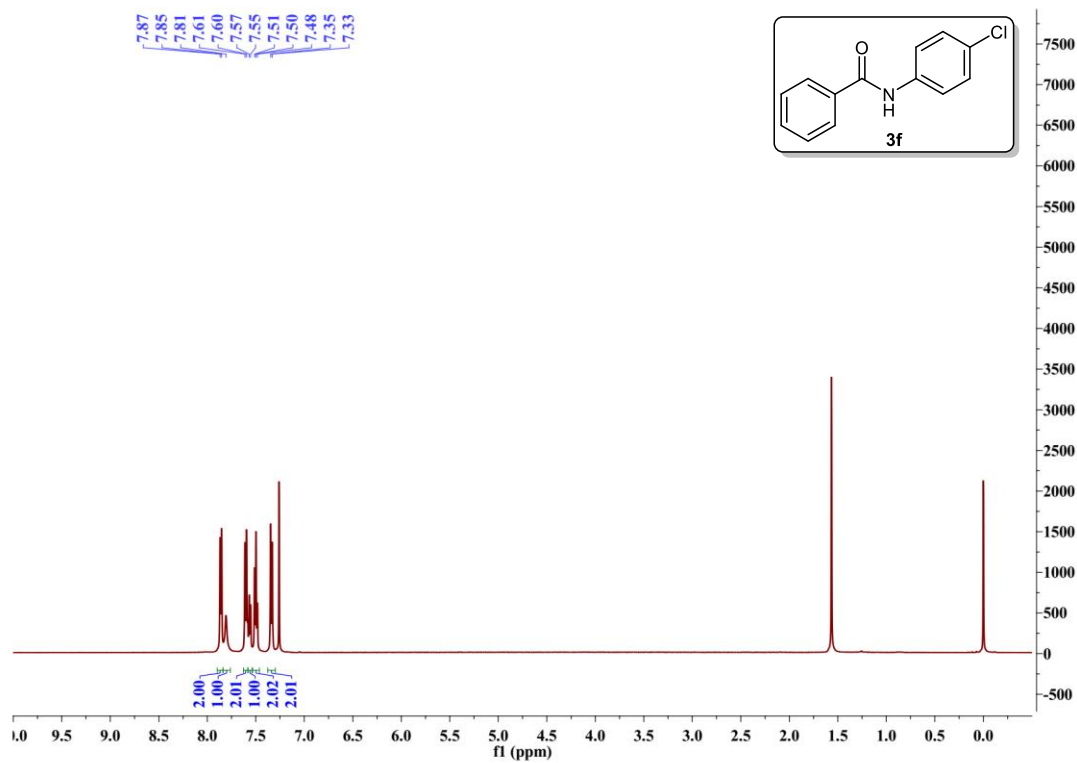

➤  $^{13}\text{C-NMR}$  spectrum for **3f**

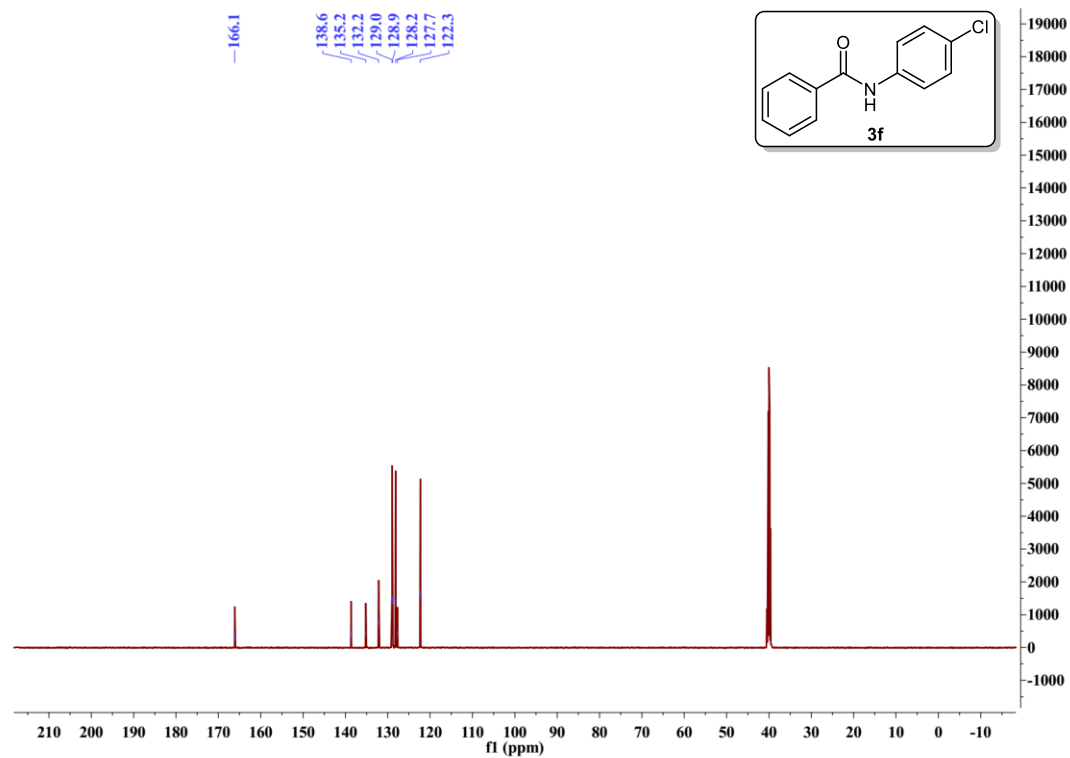

➤ HRMS spectrum for **3f**

5 #19 RT: 0.21 AV: 1 SB: 10 0.74-0.84 NL: 7.85E8  
T: FTMS + c APCI corona Full ms [60.0000-900.0000]

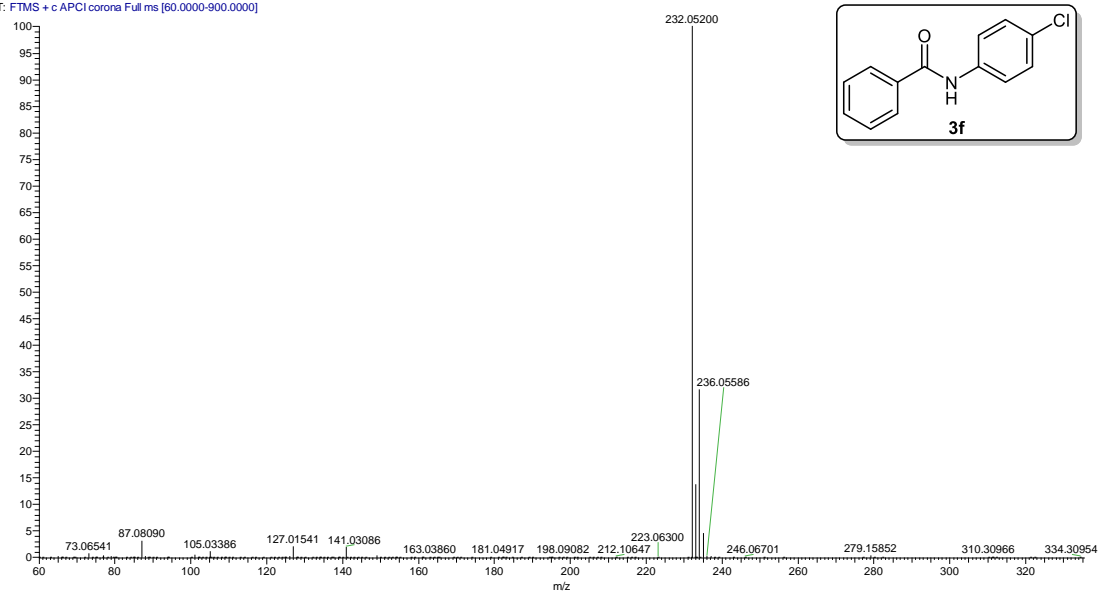

➤  $^1\text{H-NMR}$  spectrum for **3g**

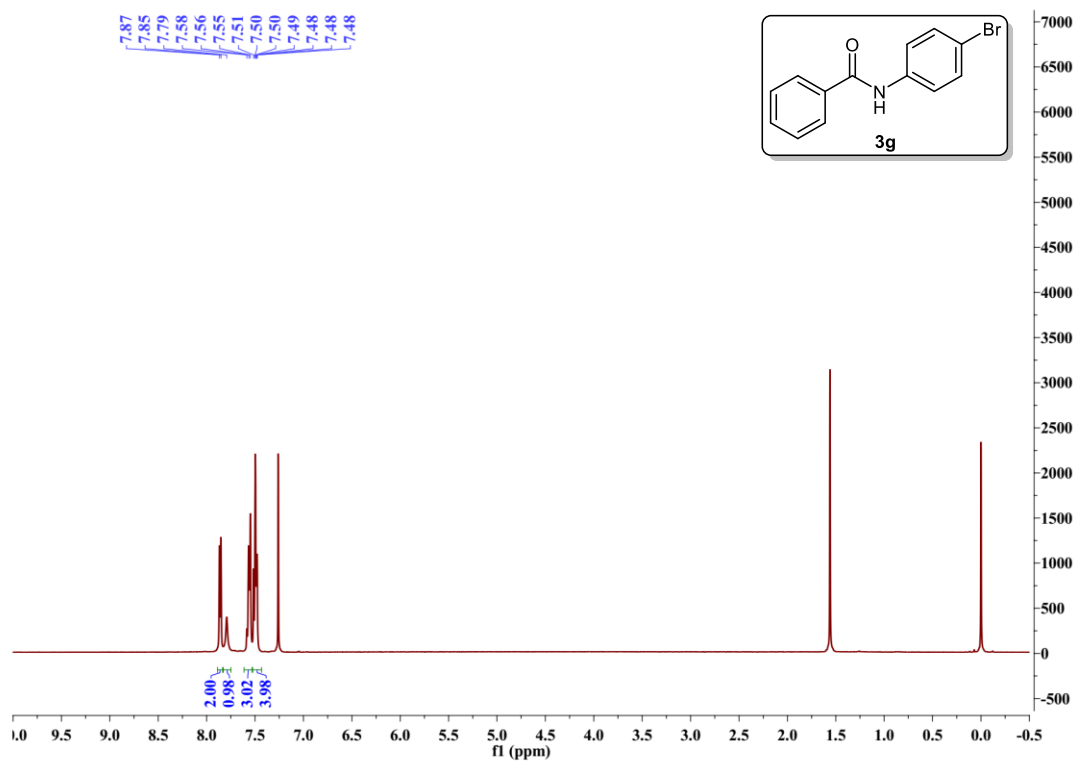

➤  $^{13}\text{C-NMR}$  spectrum for **3g**

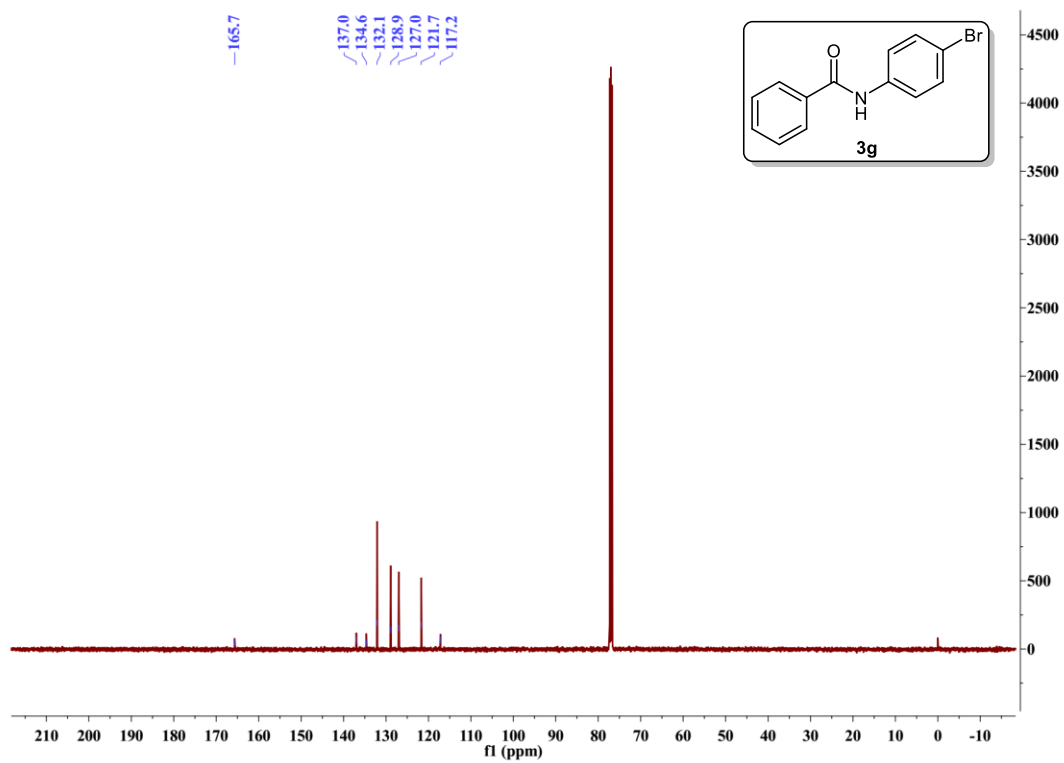

➤ HRMS spectrum for **3g**

11#19 RT: 0.21 AV: 1 NL: 5.98E8  
T: FTMS + c APCI corona Full ms [60.0000-900.0000]

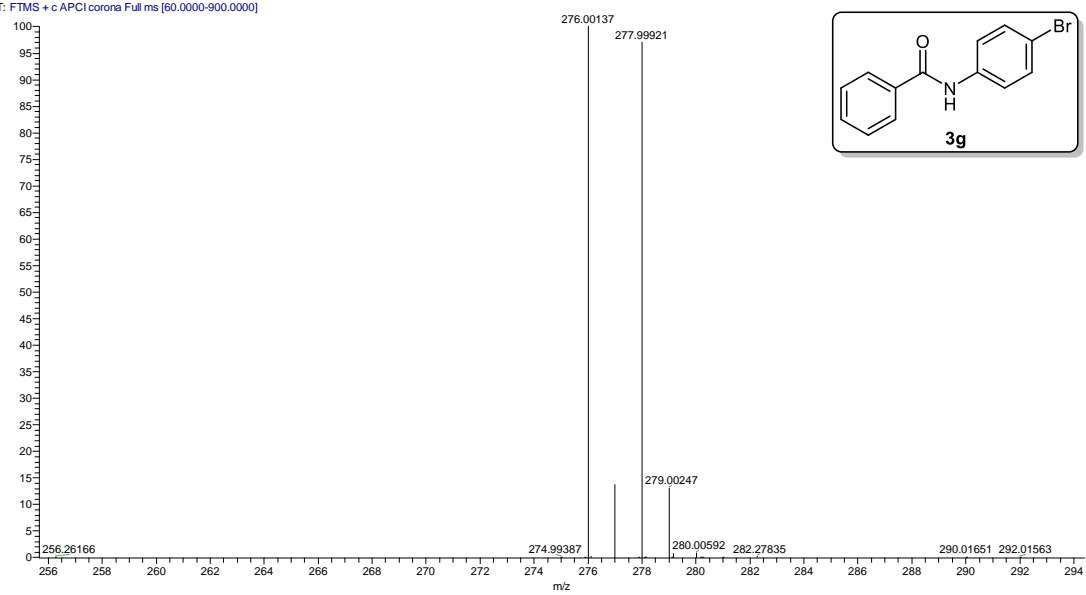



➤ <sup>1</sup>H-NMR spectrum for **3h**

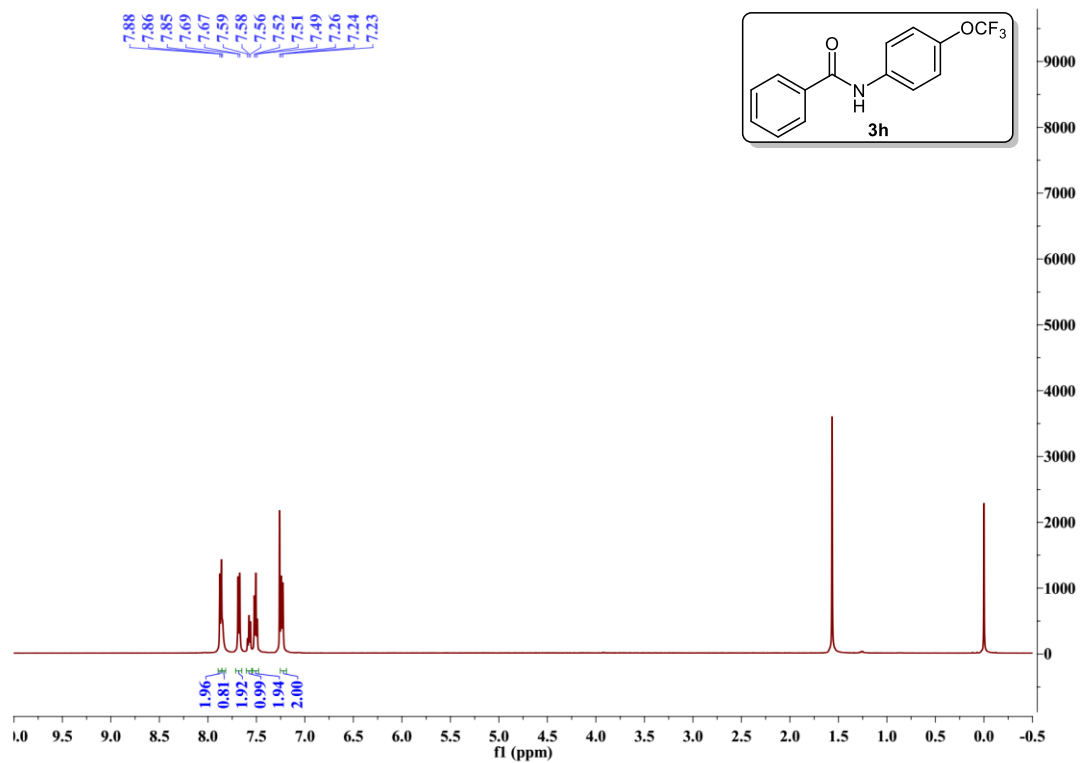

➤ <sup>13</sup>C-NMR spectrum for **3h**

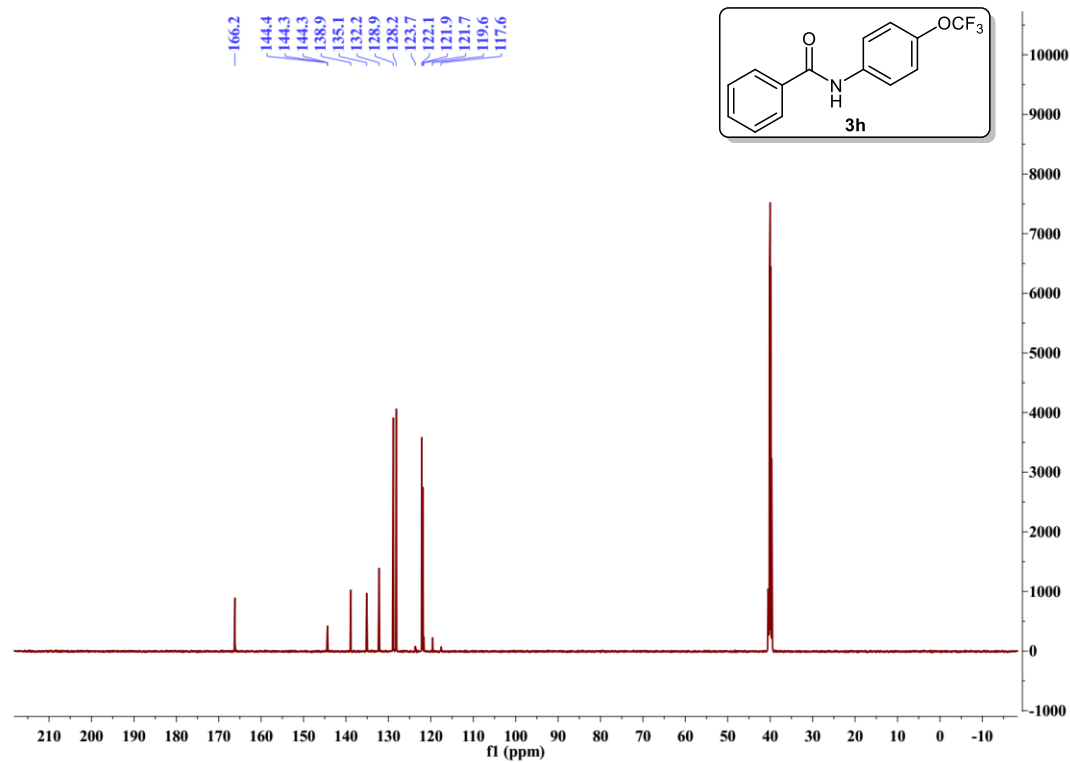

➤ HRMS spectrum for **3h**

12#19 RT: 0.21 AV: 1 SB: 9 0.62-0.72 NL: 1.75E9  
T: FTMS + c APCI corona Full ms [60.0000-900.0000]

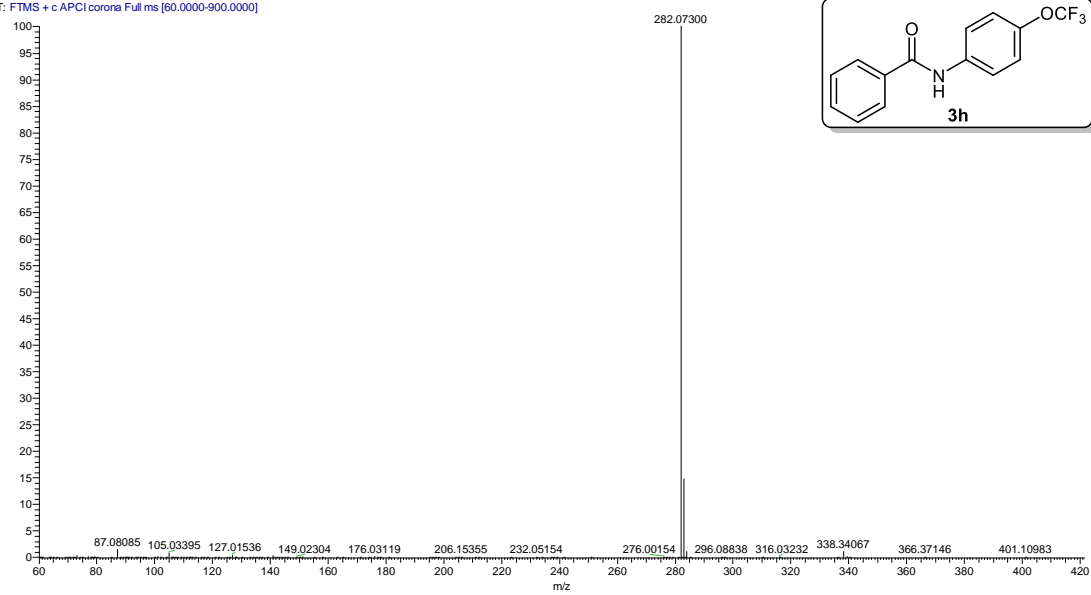

➤ <sup>1</sup>H-NMR spectrum for **3i**

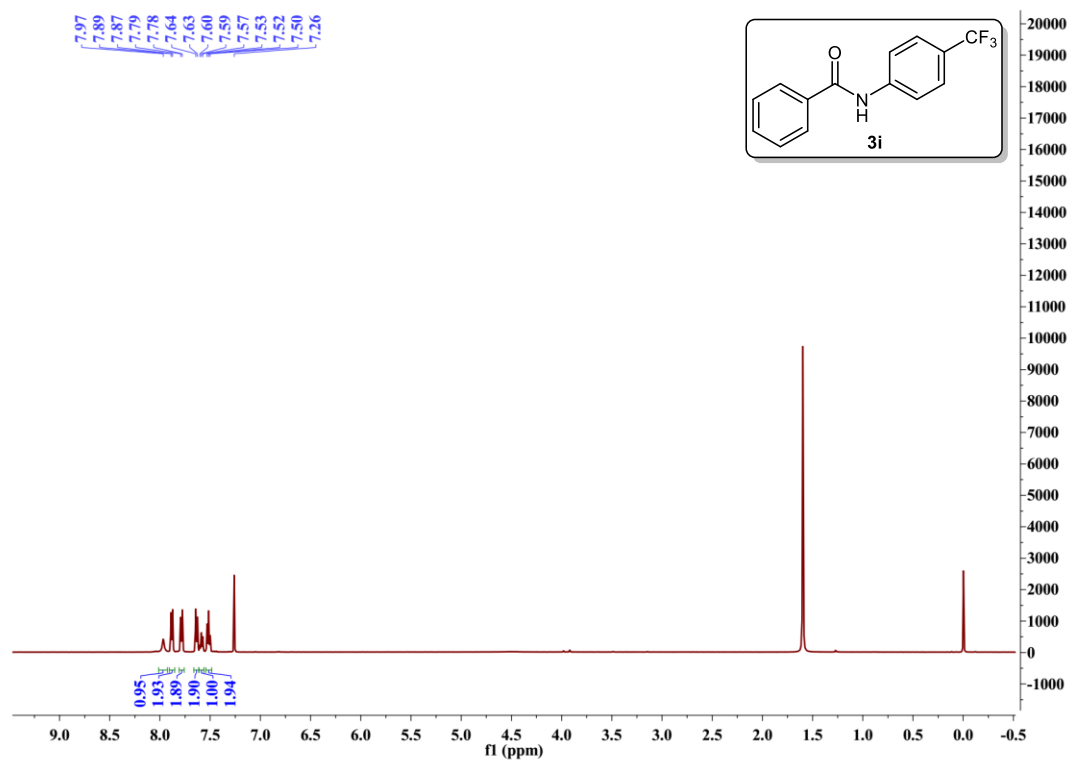

➤ <sup>13</sup>C-NMR spectrum for **3i**

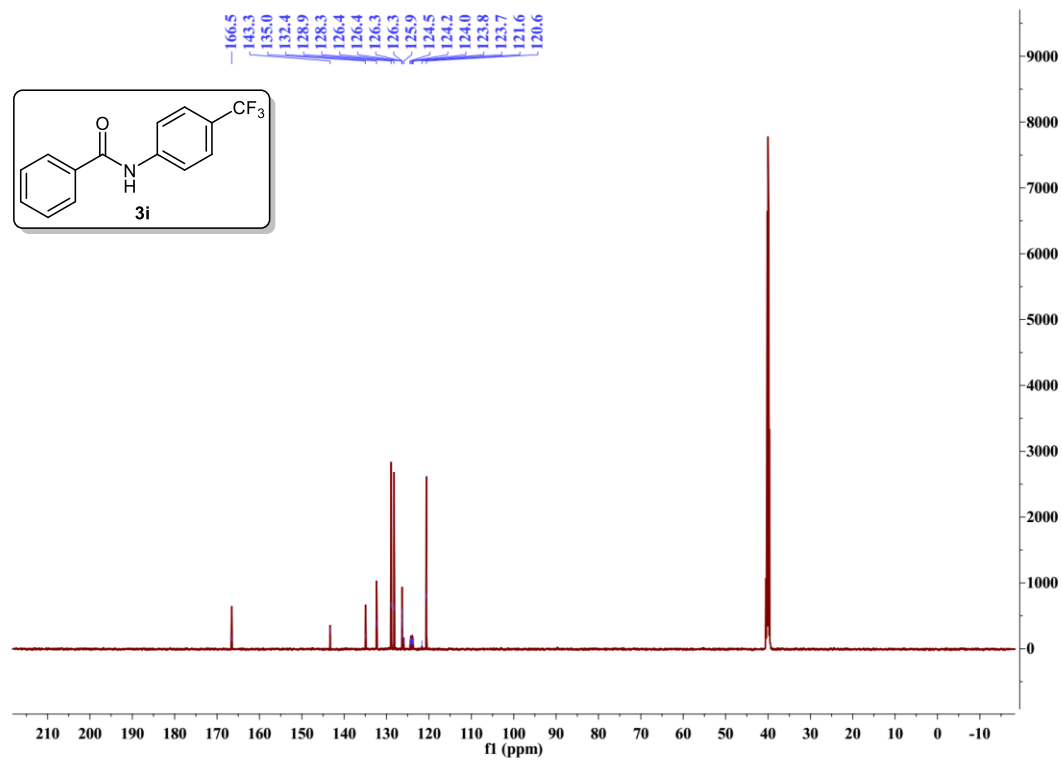

➤ HRMS spectrum for **3i**

14 #21 RT: 0.23 AV: 1 NL: 1.34E9  
T: FTMS + c APCI corona Full ms [60.0000-900.0000]

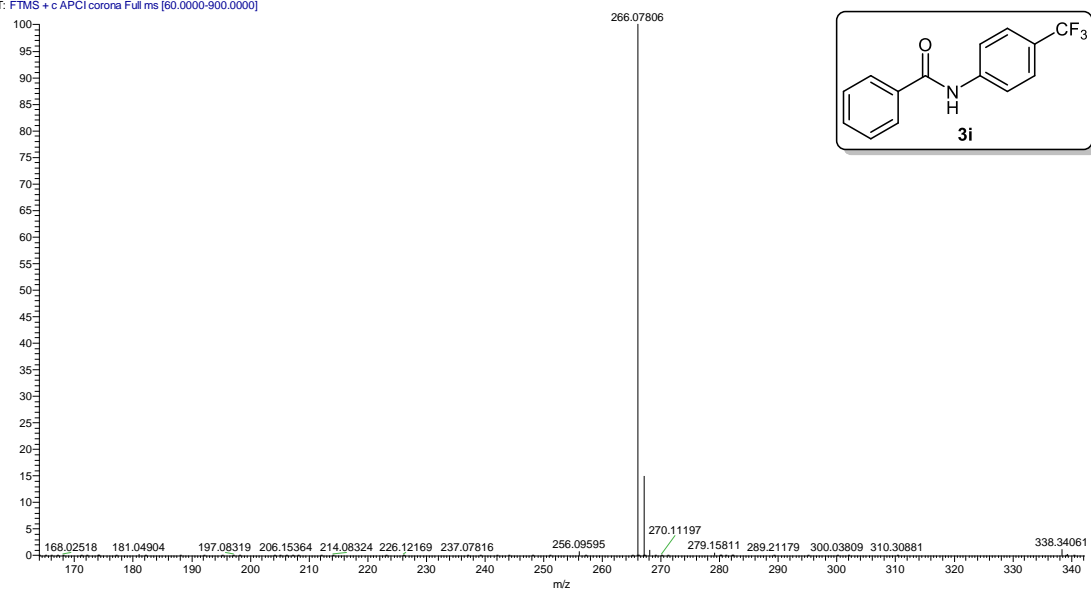

➤ <sup>1</sup>H-NMR spectrum for **3j**

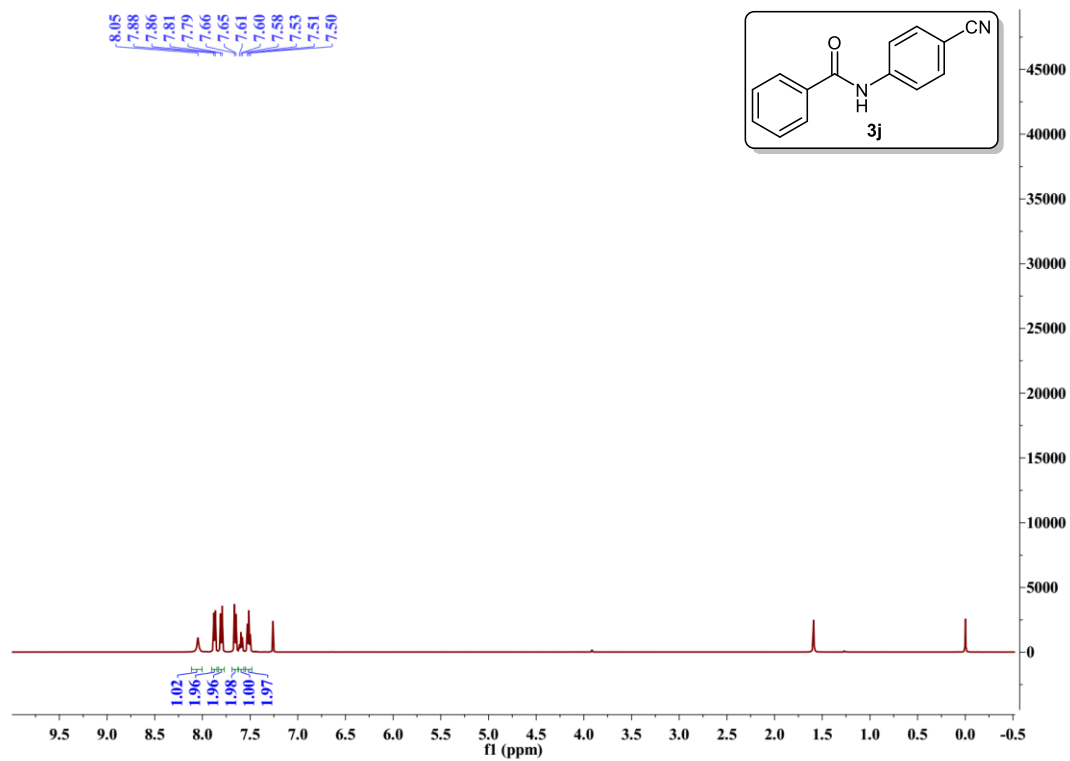

➤ <sup>13</sup>C-NMR spectrum for **3j**

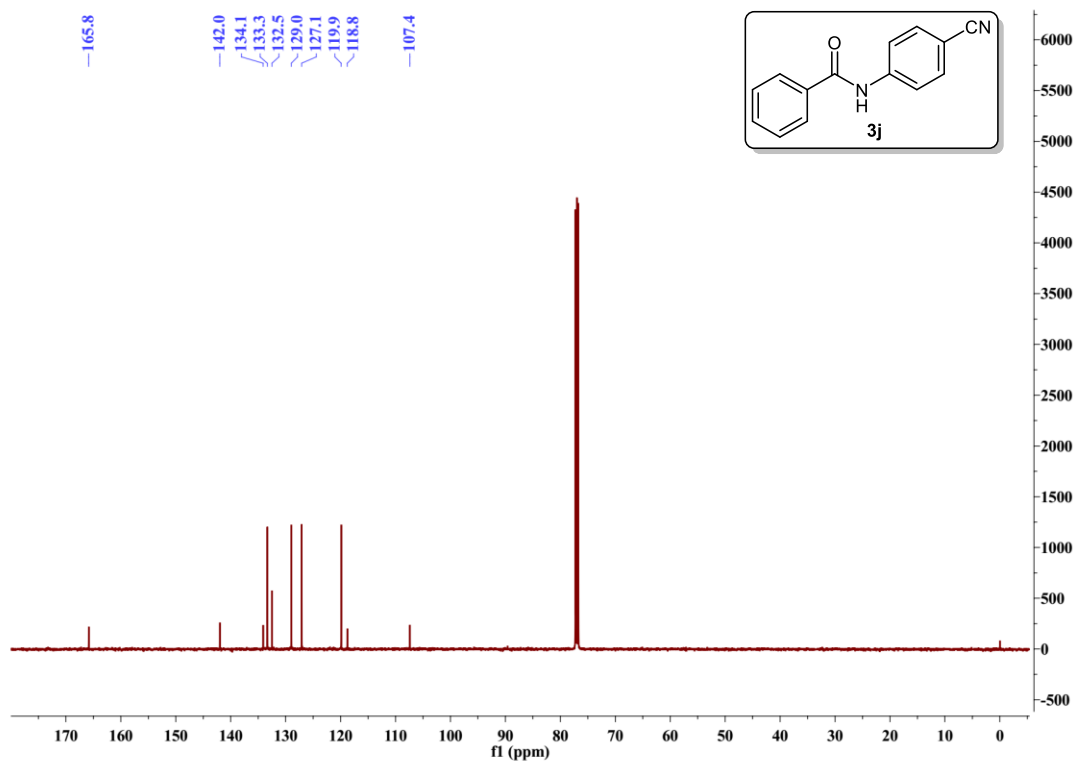

➤ HRMS spectrum for **3j**

15 #21 RT: 0.23 AV: 1 NL: 1.31E9  
T: FTMS + c APCI corona Full ms [60.0000-900.0000]

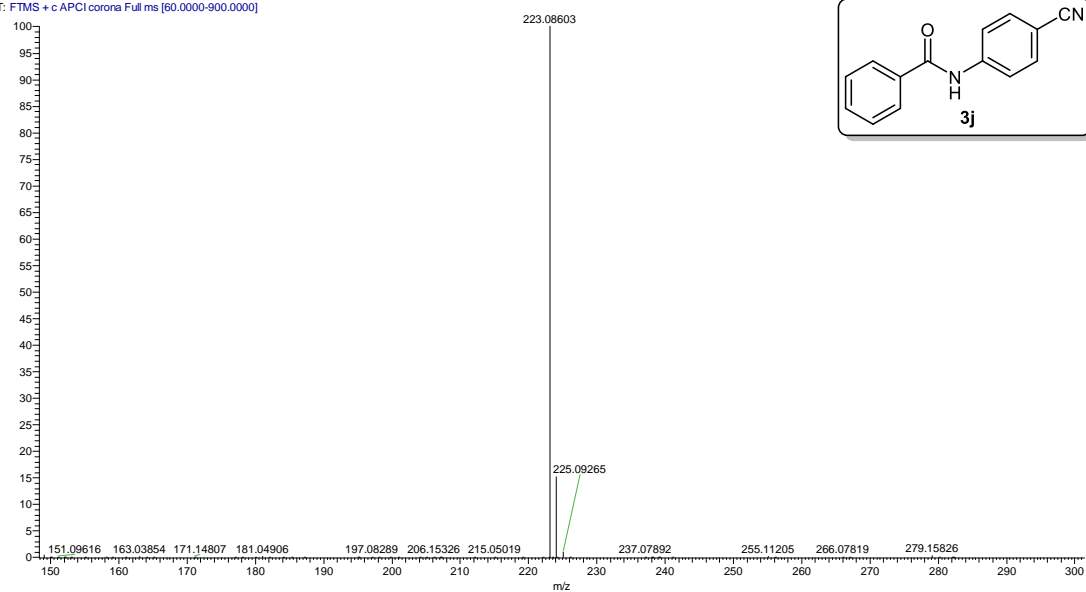

➤ <sup>1</sup>H-NMR spectrum for **3k**

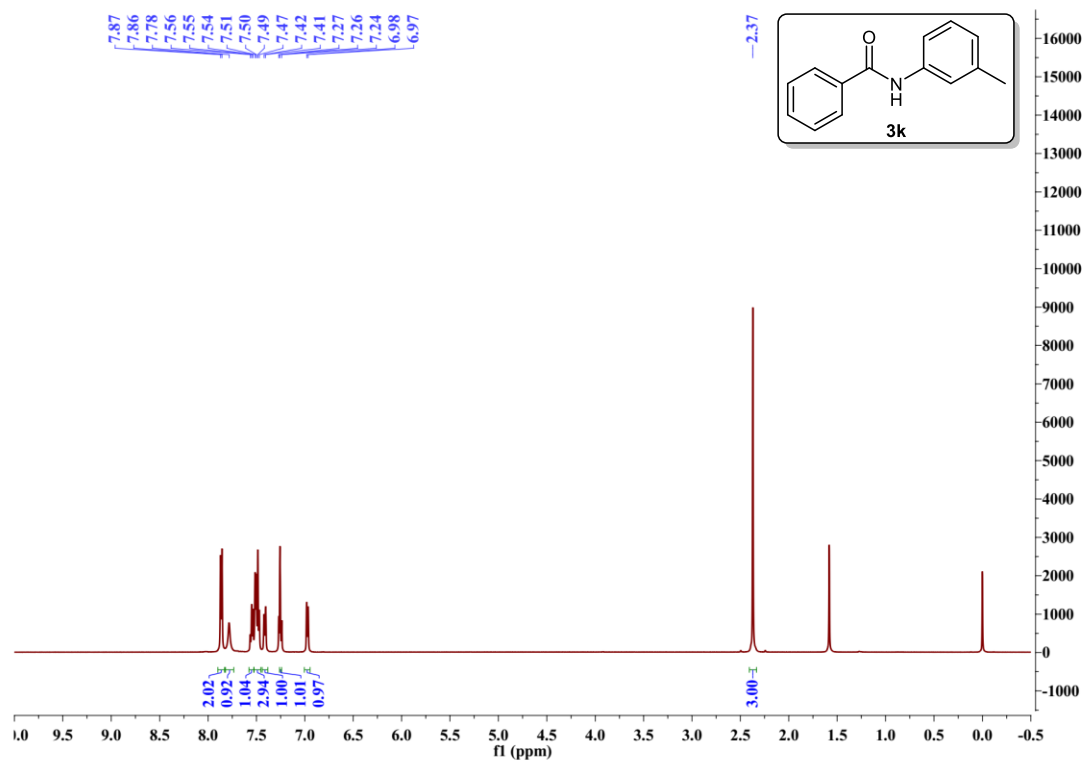

➤ <sup>13</sup>C-NMR spectrum for **3k**

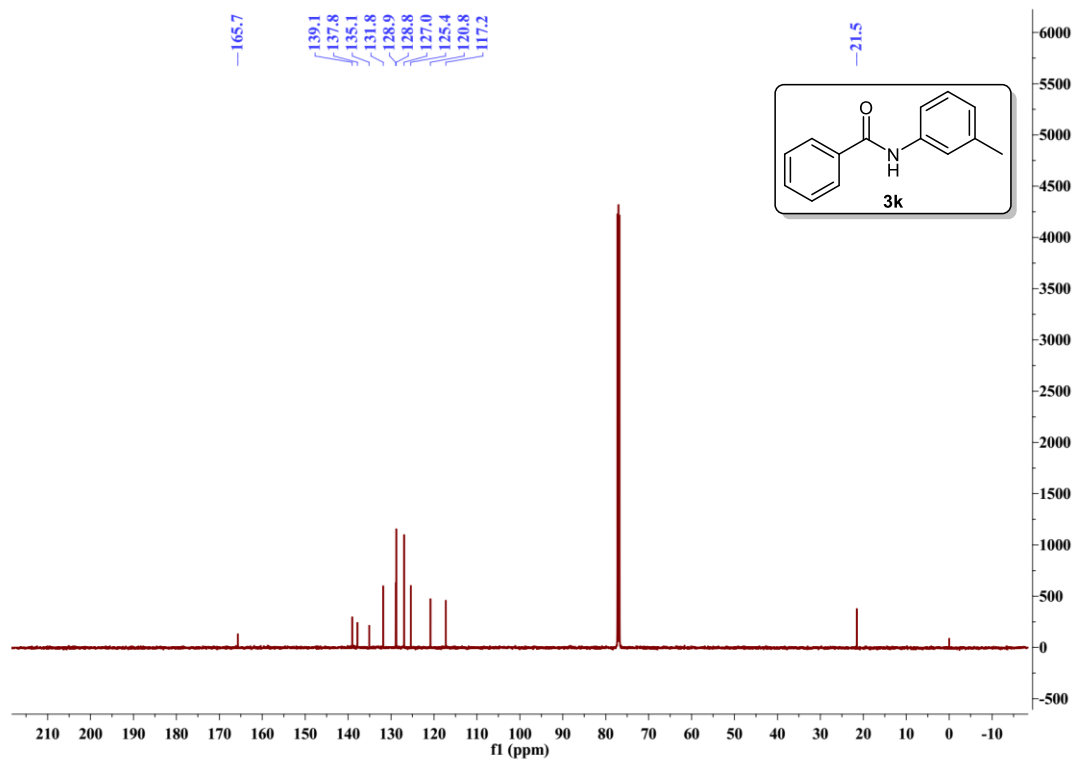

➤ HRMS spectrum for **3k**

13 #19 RT: 0.22 AV: 1 SB: 12 0.63-0.76 NL: 6.49E7  
T: FTMS + c APCI corona Full ms [60.0000-900.0000]

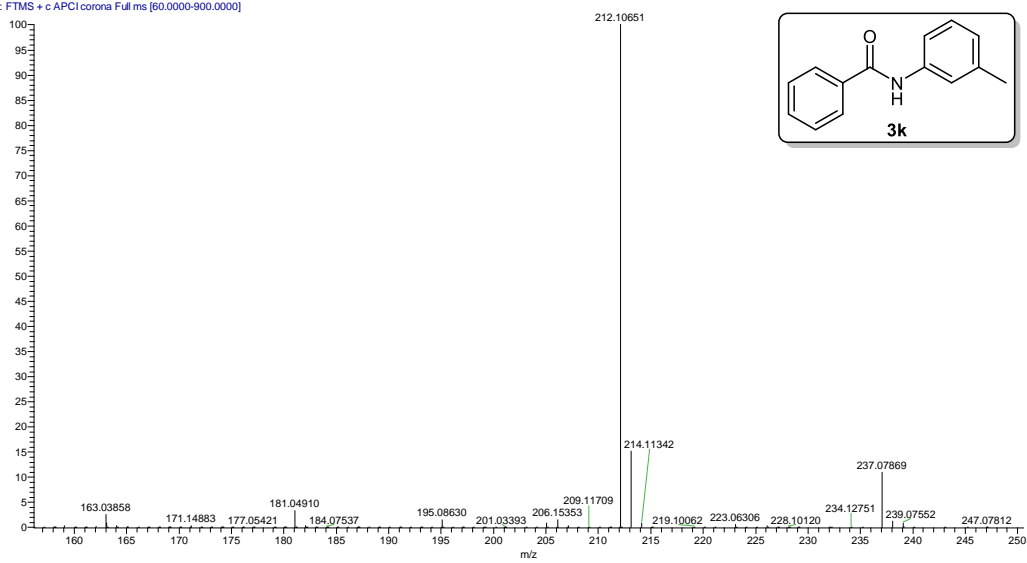



➤ <sup>1</sup>H-NMR spectrum for **31**

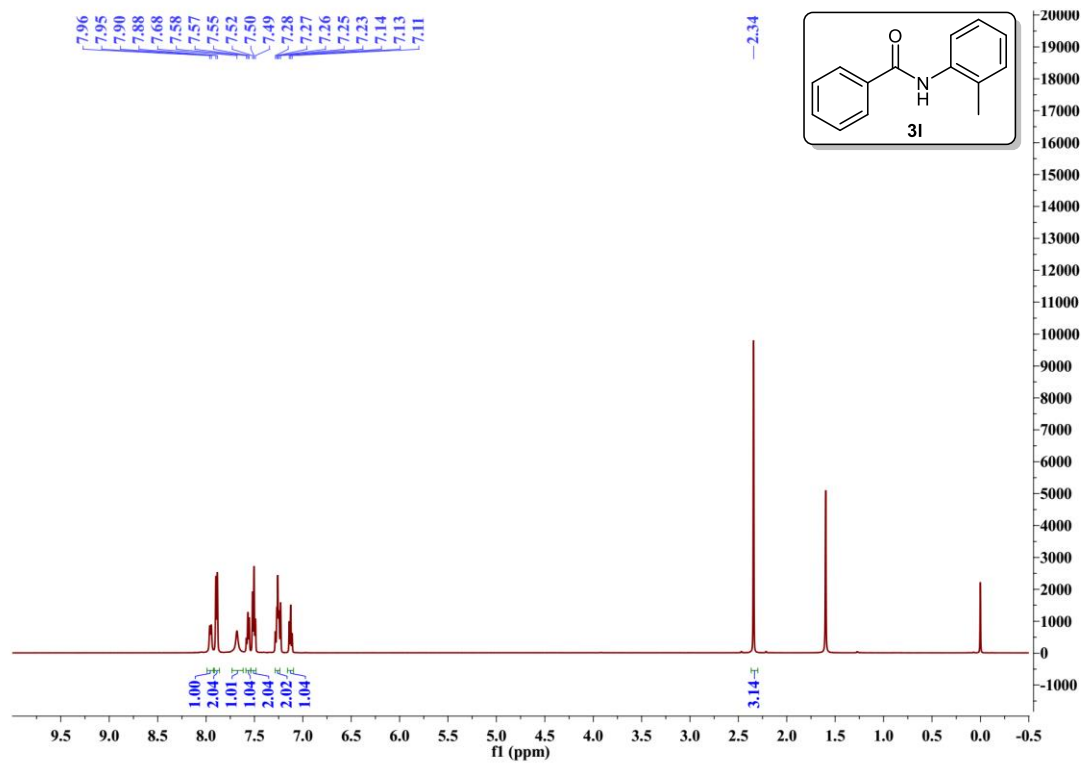

➤ <sup>13</sup>C-NMR spectrum for **31**

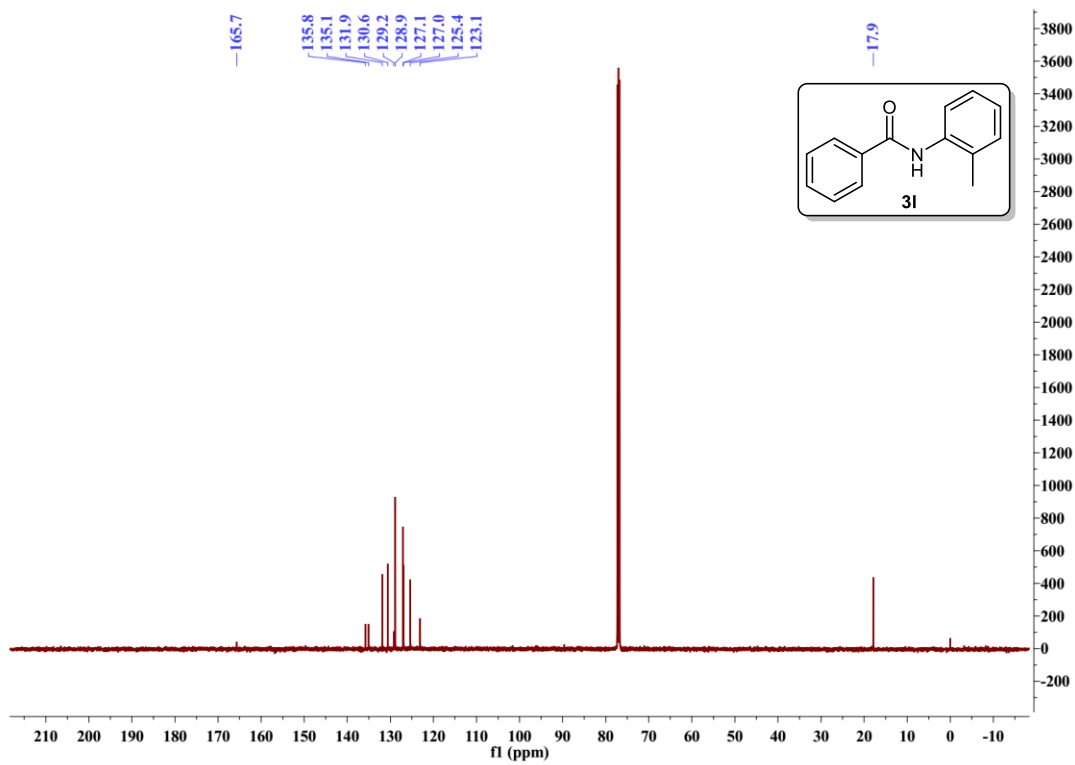

➤ HRMS spectrum for **31**

16 #19 RT: 0.21 AV: 1 NL: 2.88E9  
T: FTMS + c APCI corona Full ms [60.0000-900.0000]

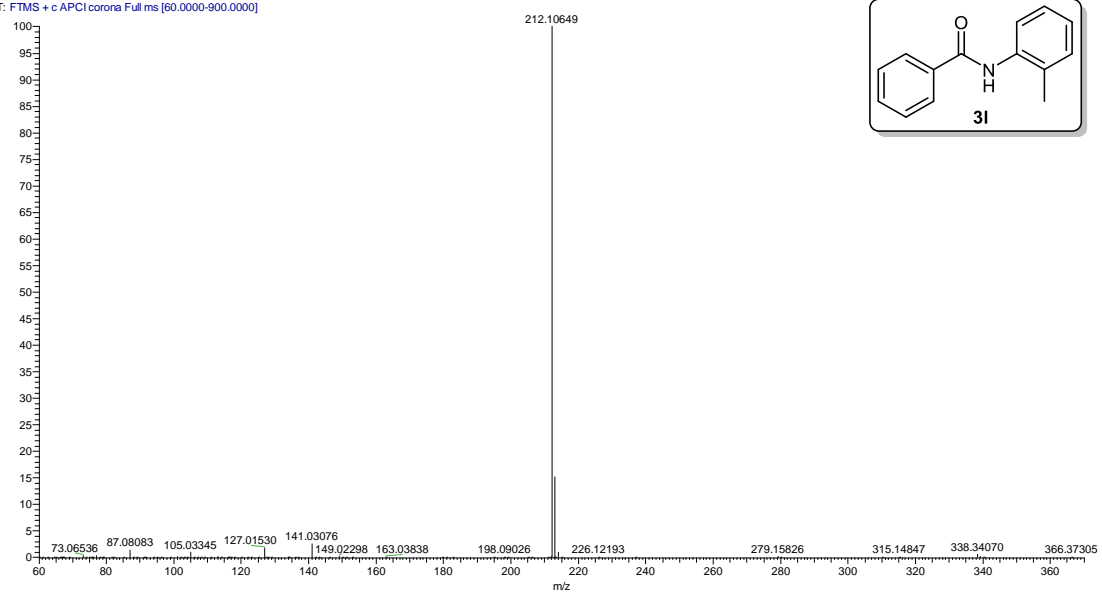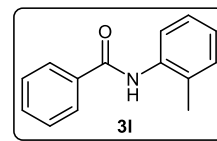

➤  $^1\text{H-NMR}$  spectrum for **3m**

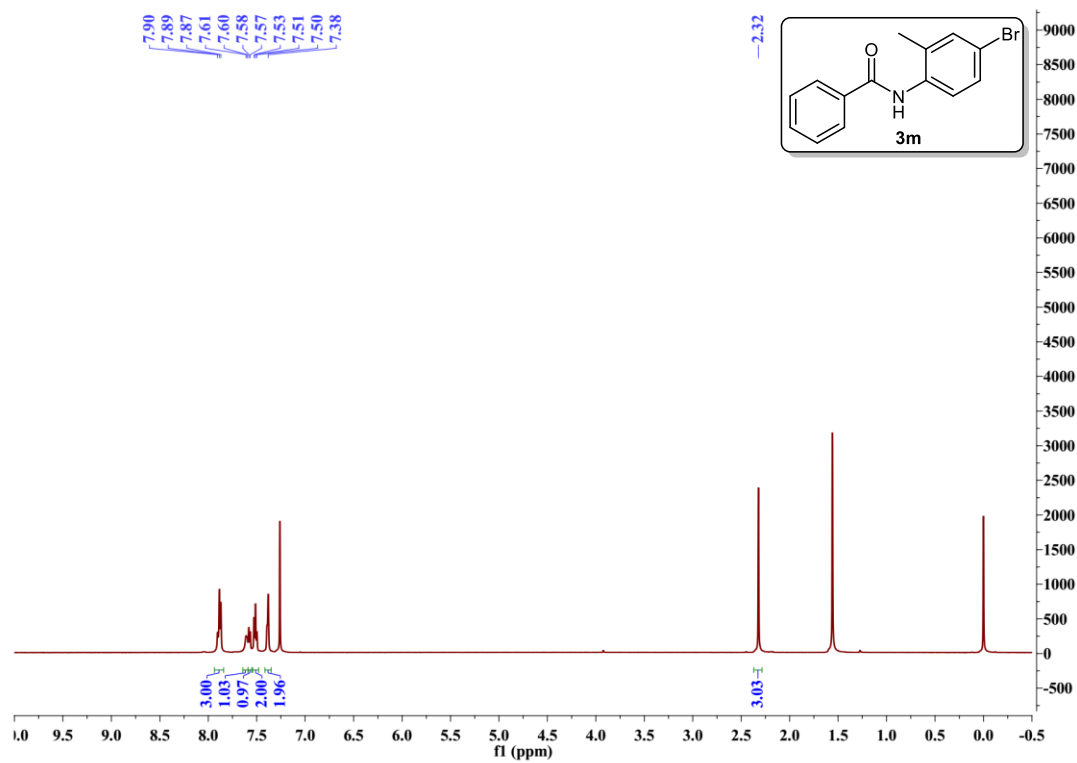

➤  $^{13}\text{C-NMR}$  spectrum for **3m**

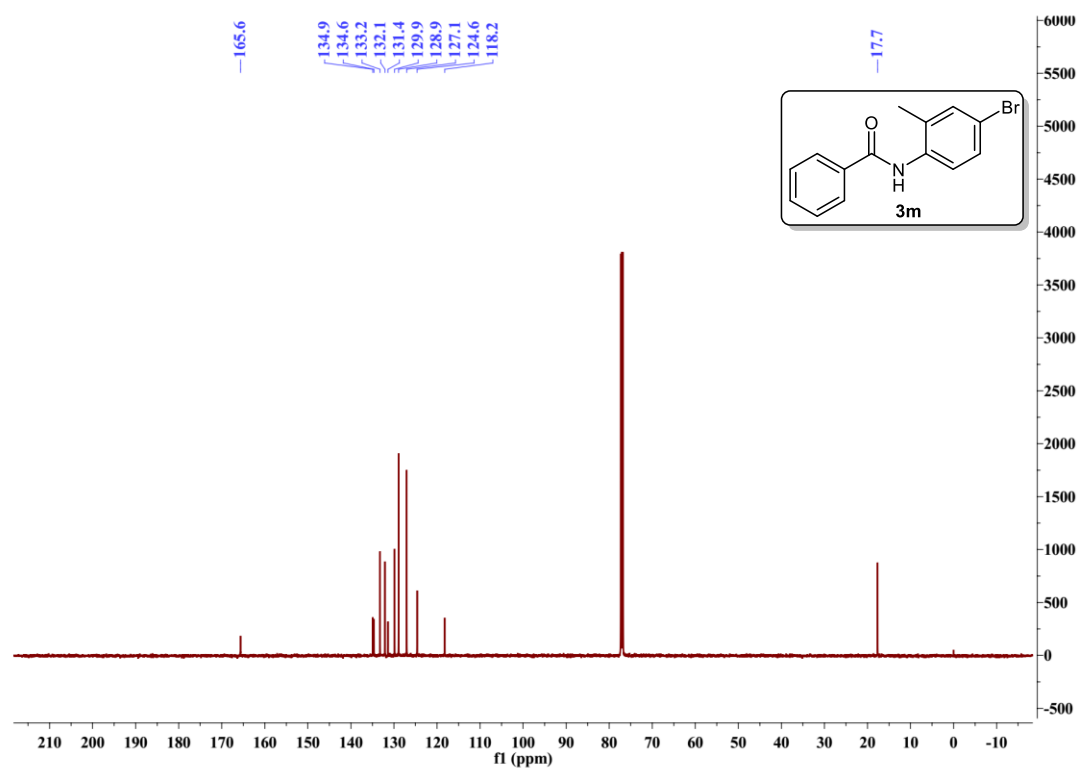

➤ HRMS spectrum for **3m**

21 #21 RT: 0.24 AV: 1 NL: 4.45E6  
T: FTMS + c APCI/corona Full ms [60.0000-900.0000]

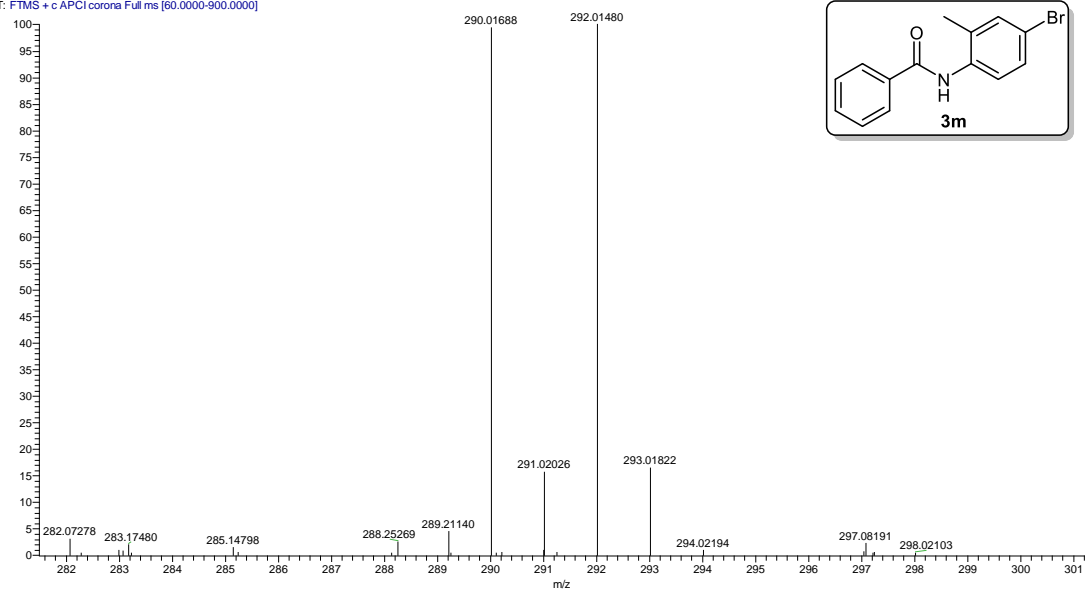

➤  $^1\text{H-NMR}$  spectrum for **3n**

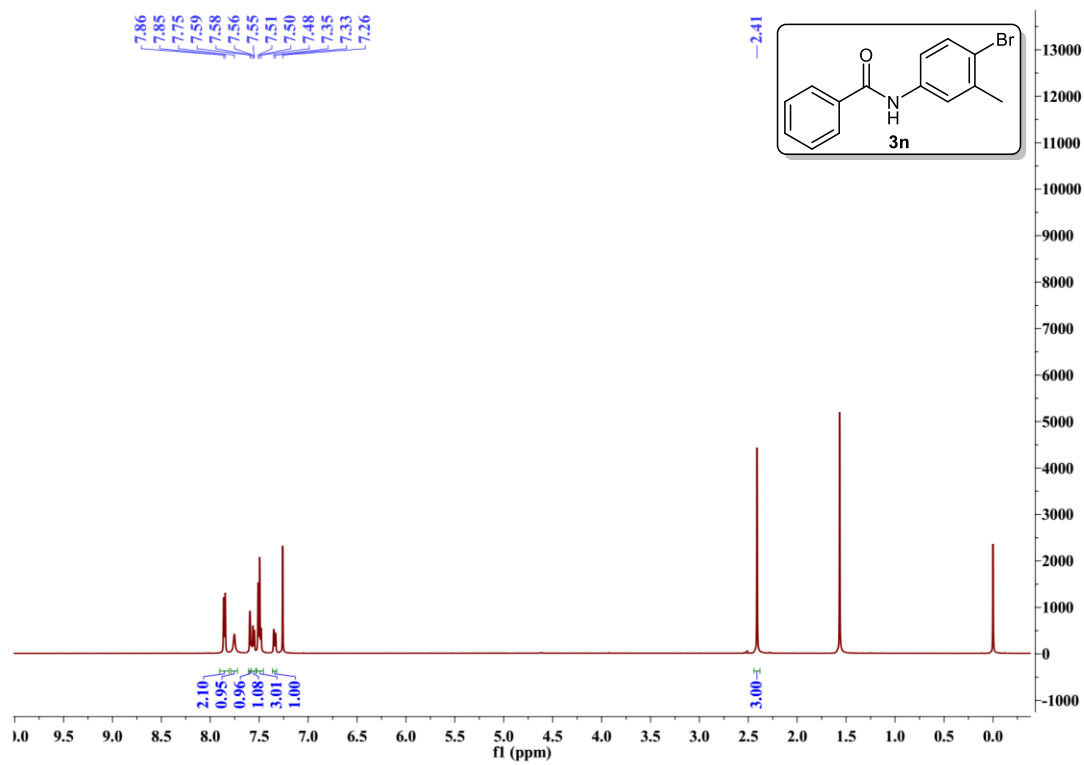

➤  $^{13}\text{C-NMR}$  spectrum for **3n**

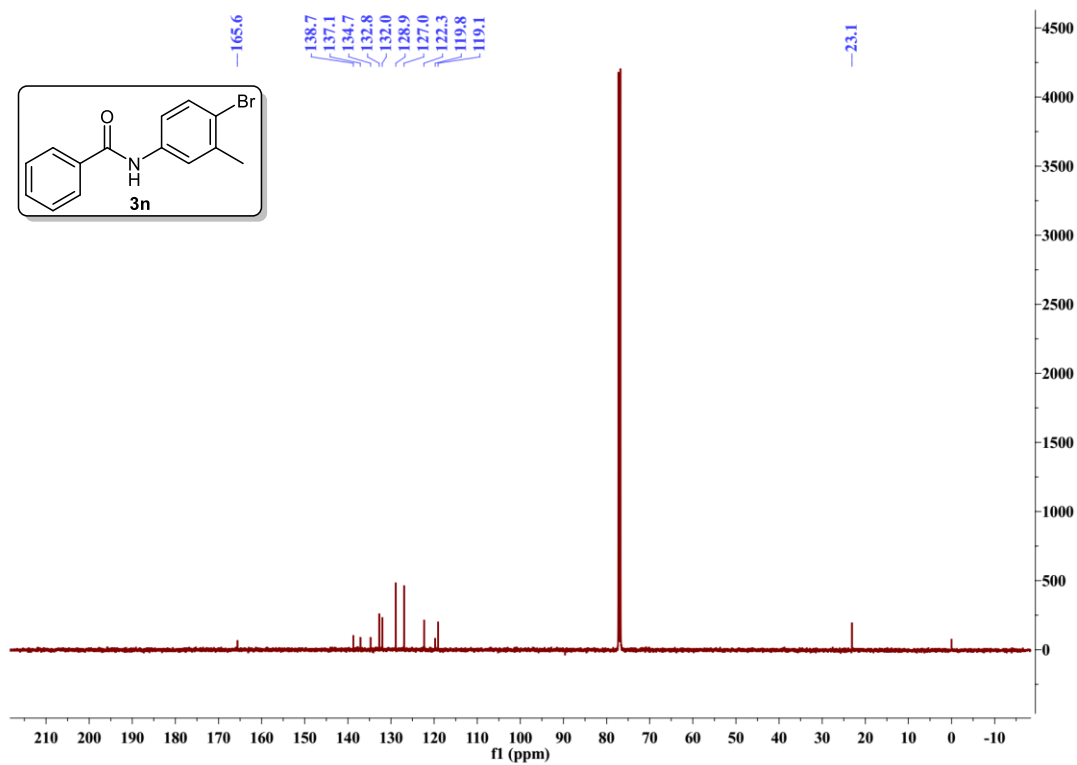

➤ HRMS spectrum for **3n**

22 #21 RT: 0.23 AV: 1 NL: 8.16E8  
T: FTMS + c APCI corona Full ms [60.0000-900.0000]

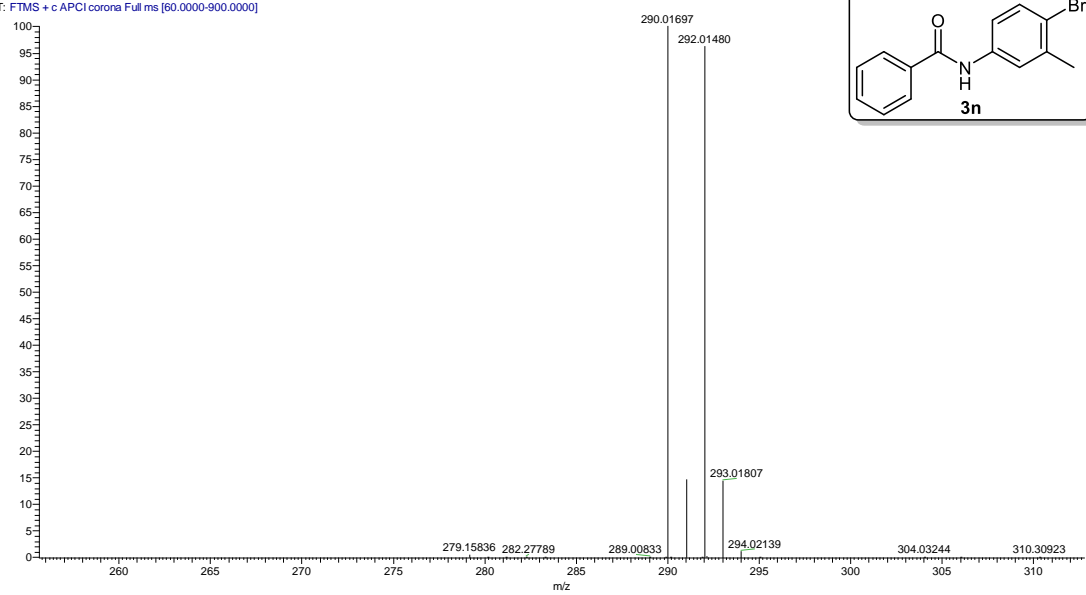

➤ <sup>1</sup>H-NMR spectrum for **3o**

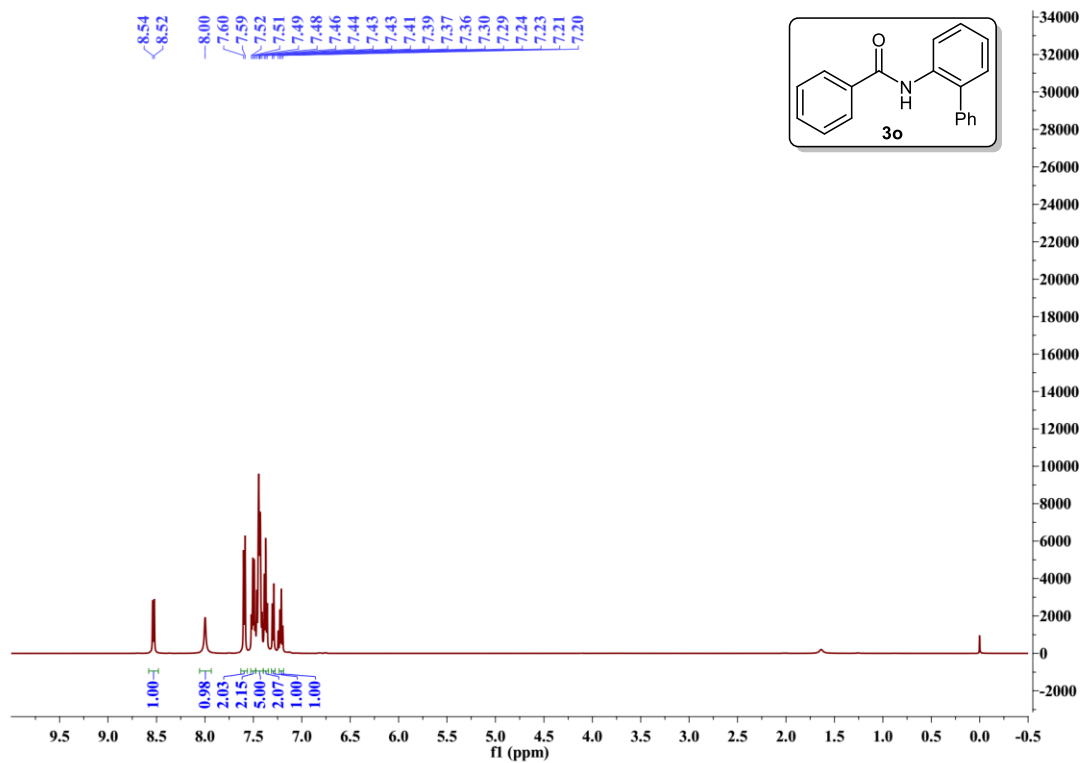

➤ <sup>13</sup>C-NMR spectrum for **3o**

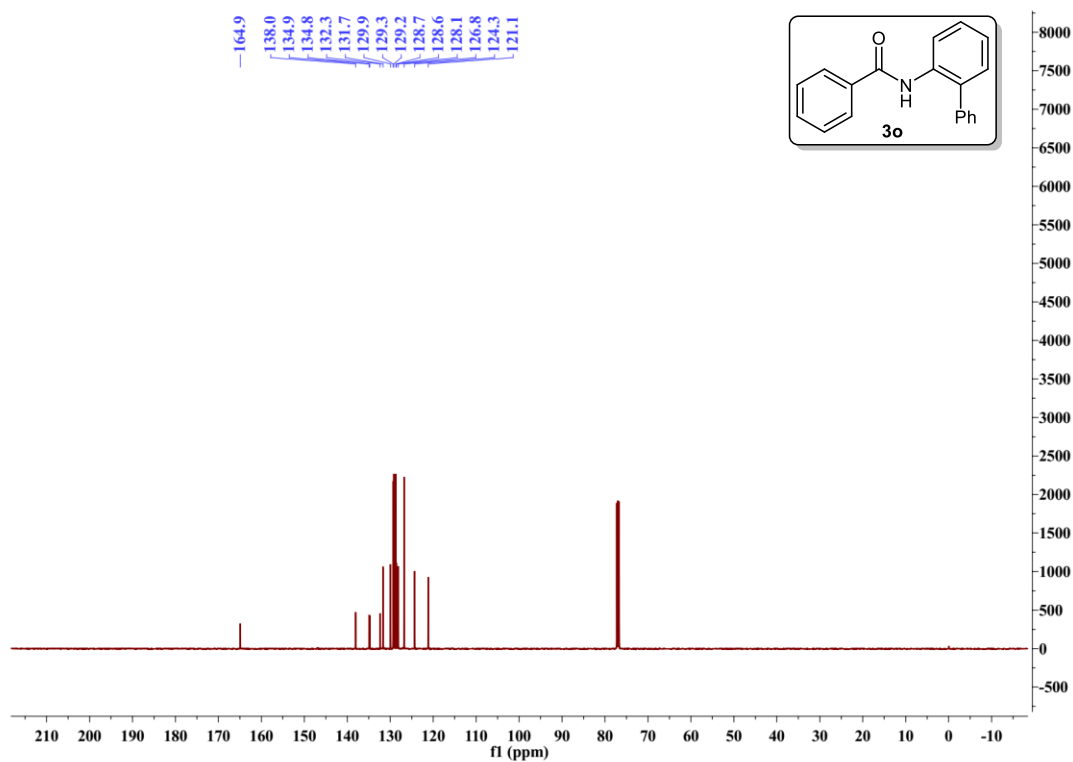

➤ HRMS spectrum for **3o**

37 #17 RT: 0.19 AV: 1 NL: 1.81E9  
T: FTMS + c APCI corona Full ms [60.0000-900.0000]

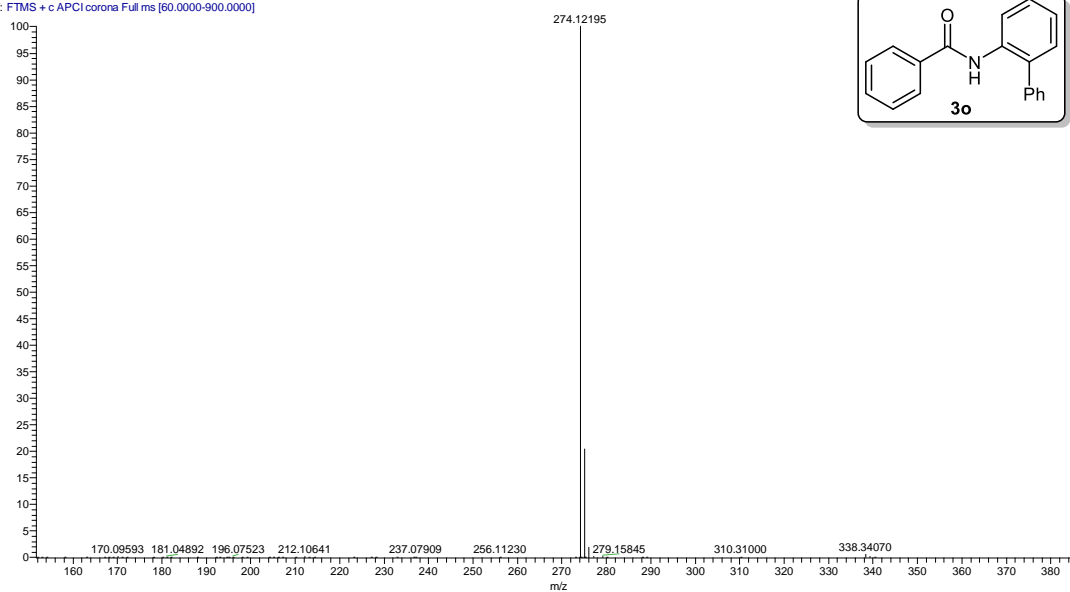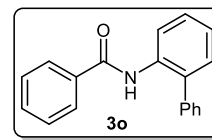



➤  $^1\text{H-NMR}$  spectrum for **3p**

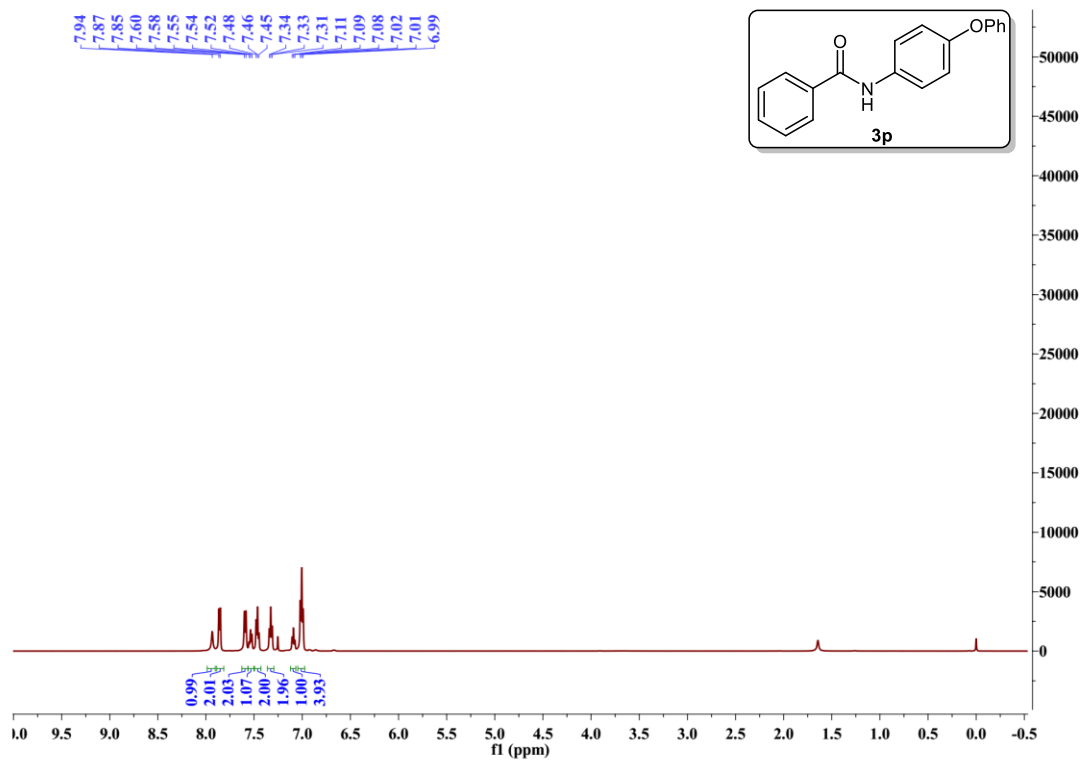

➤  $^{13}\text{C-NMR}$  spectrum for **3p**

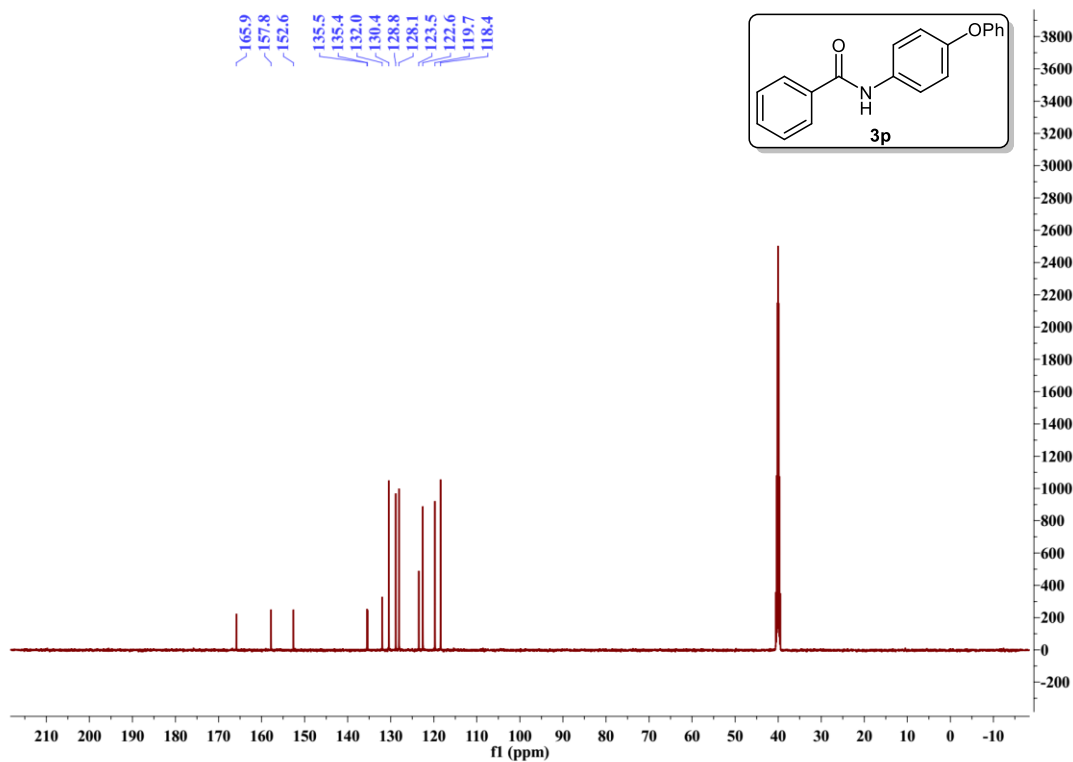

➤ HRMS spectrum for **3p**

7 #19 RT: 0.21 AV: 1 SB: 9 0.78-0.87 NL: 8.62E8  
T: FTMS + c APCI corona Full ms [60.0000-900.0000]

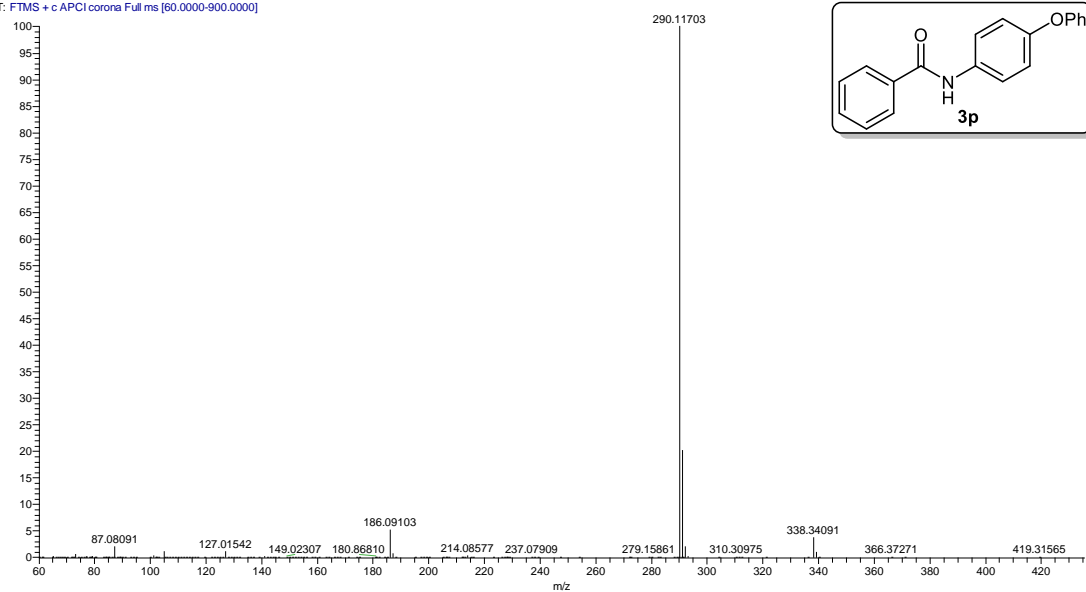

➤ <sup>1</sup>H-NMR spectrum for **3q**

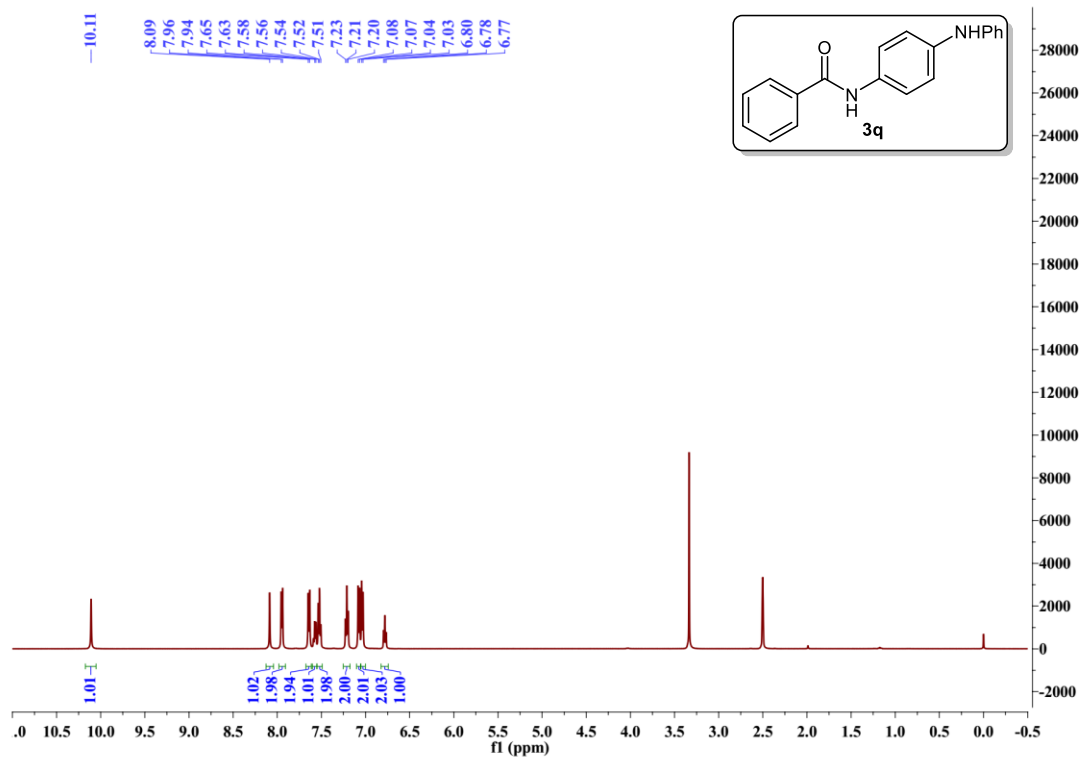

➤ <sup>13</sup>C-NMR spectrum for **3q**

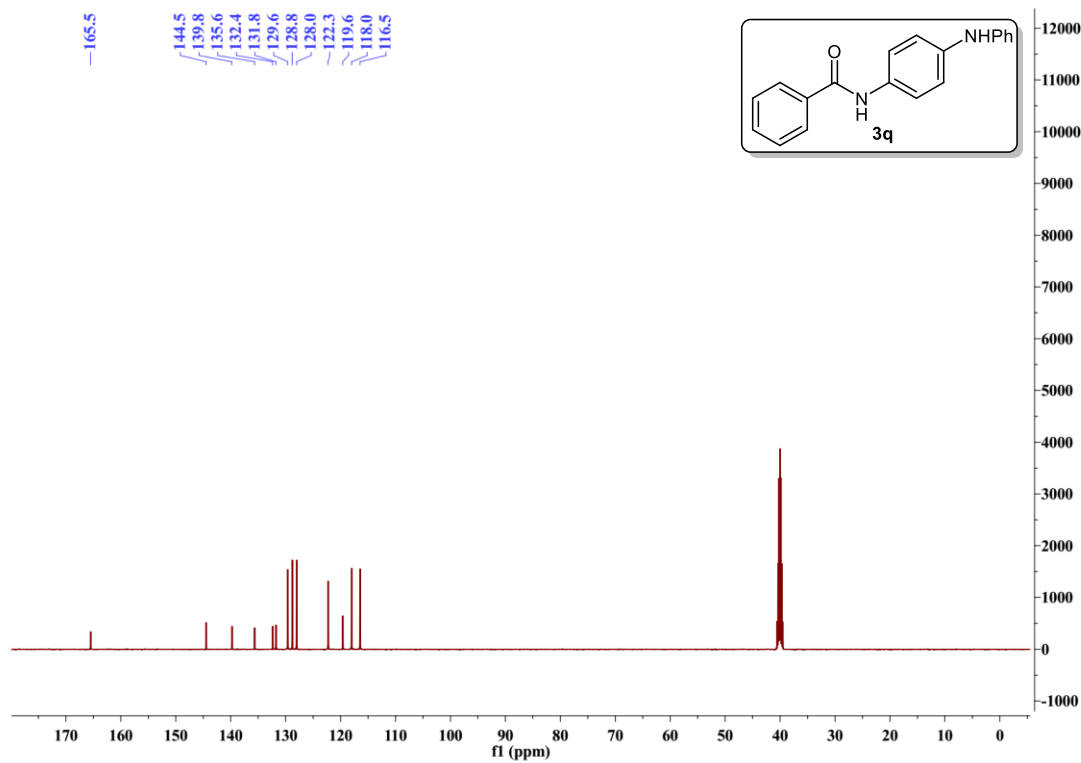

➤ HRMS spectrum for **3q**

23#19 RT: 0.22 AV: 1 NL: 7.76E8  
T: FTMS + c APCI/corona Full ms [60.0000-900.0000]

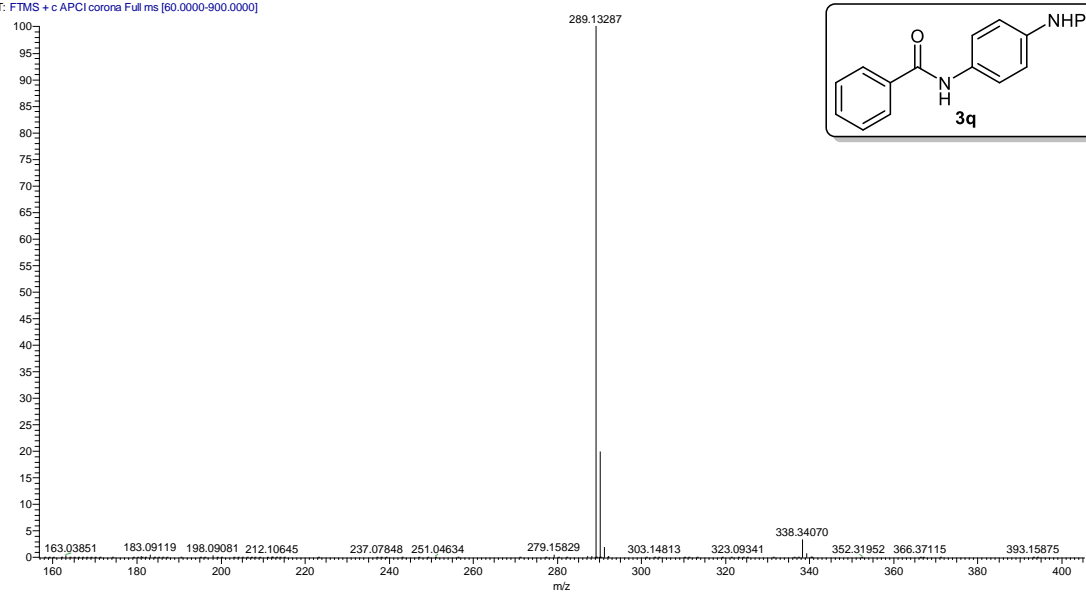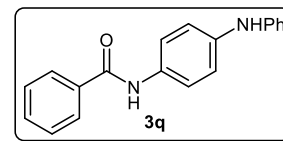

➤ <sup>1</sup>H-NMR spectrum for **3r**

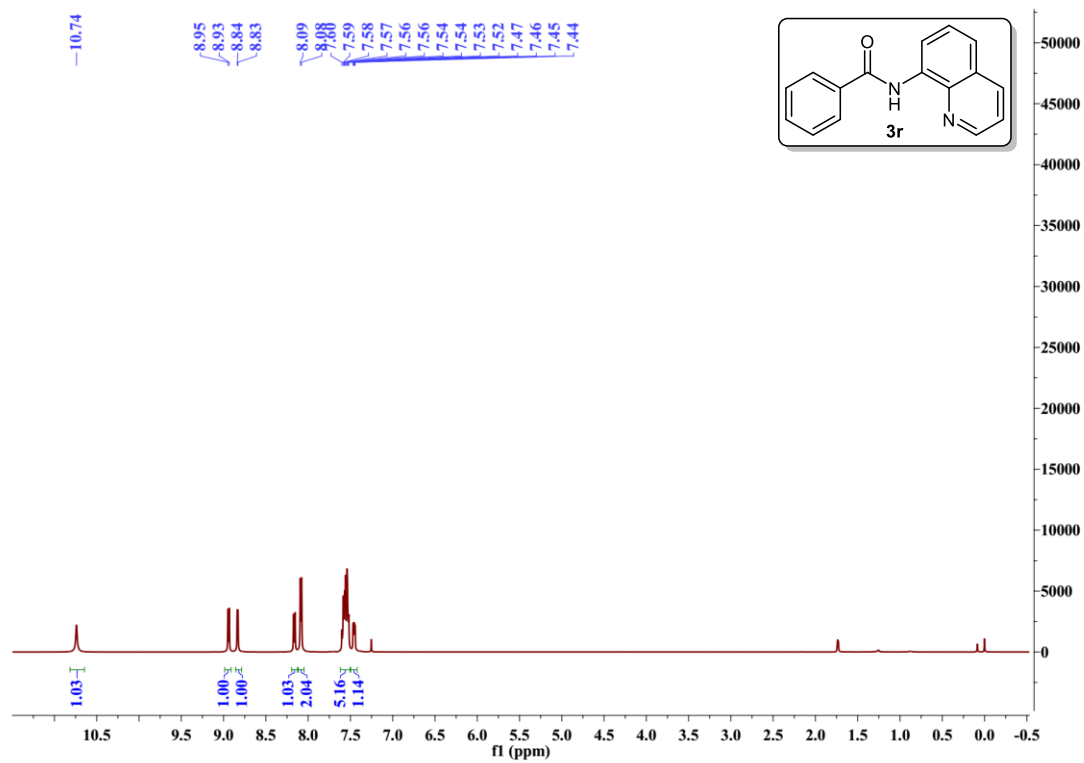

➤ <sup>13</sup>C-NMR spectrum for **3r**

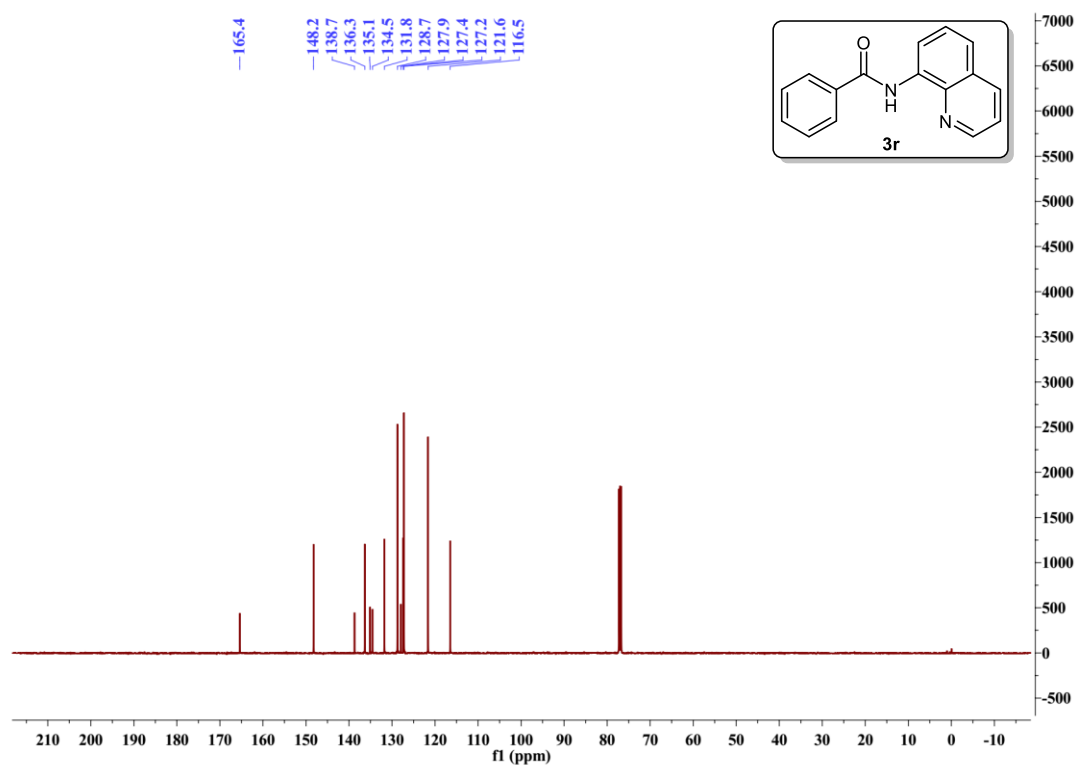

➤ HRMS spectrum for **3r**

17 #21 RT: 0.23 AV: 1 NL: 2.56E9  
T: FTMS + c APCI corona Full ms [60.0000-900.0000]

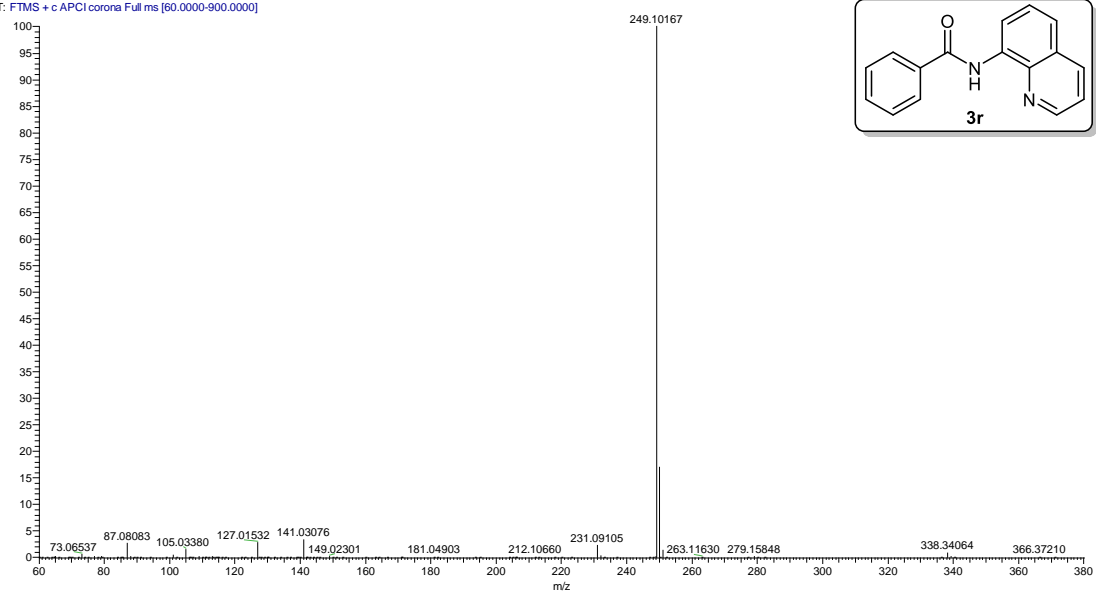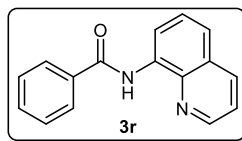

➤ <sup>1</sup>H-NMR spectrum for **3s**

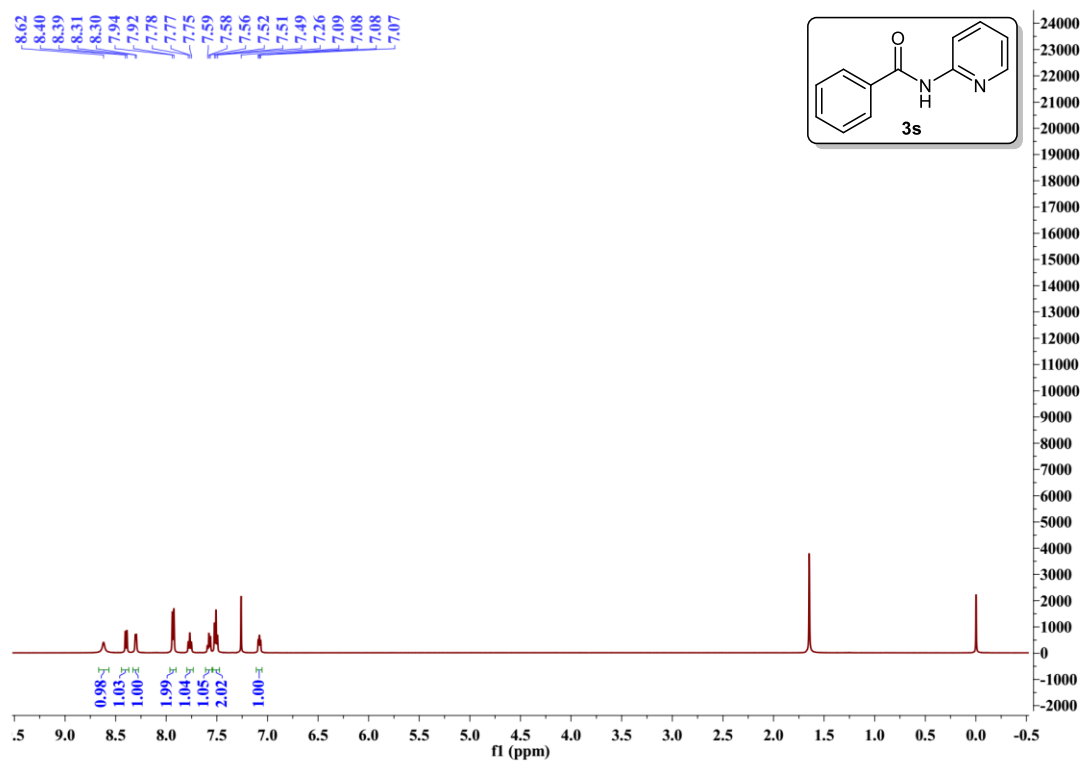

➤ <sup>13</sup>C-NMR spectrum for **3s**

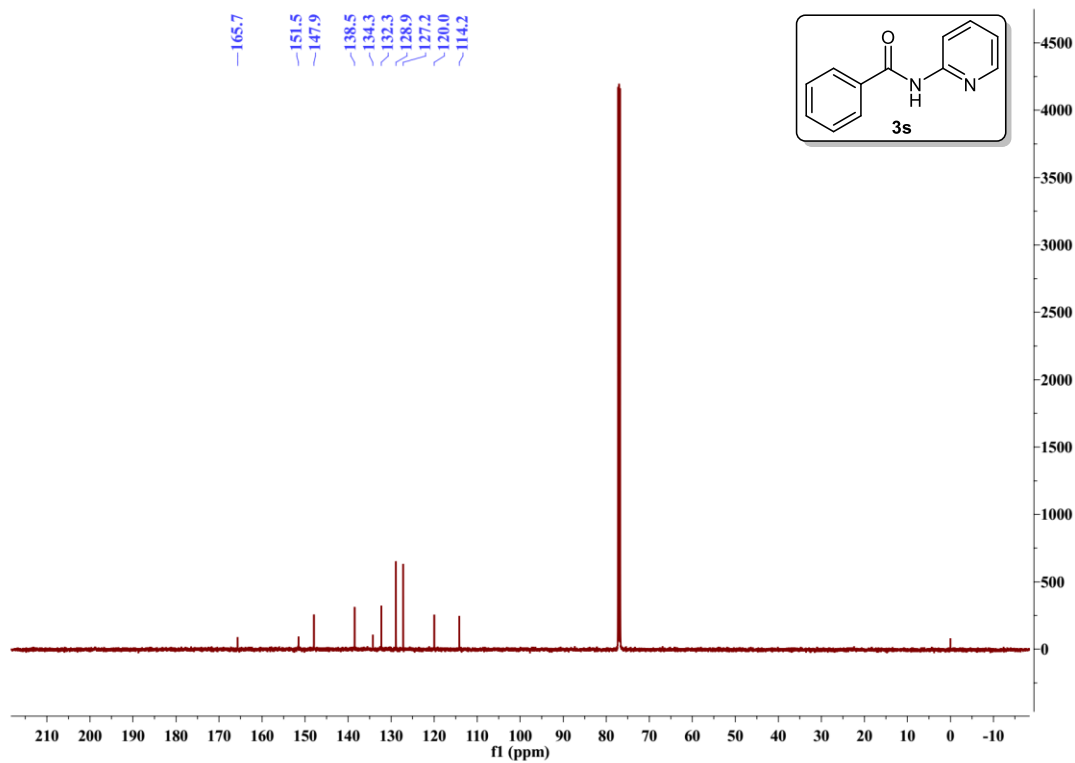

➤ HRMS spectrum for **3s**

19#19 RT: 0.21 AV: 1 NL: 2.02E9  
T: FTMS + c APCI/corona Full ms [60.0000-900.0000]

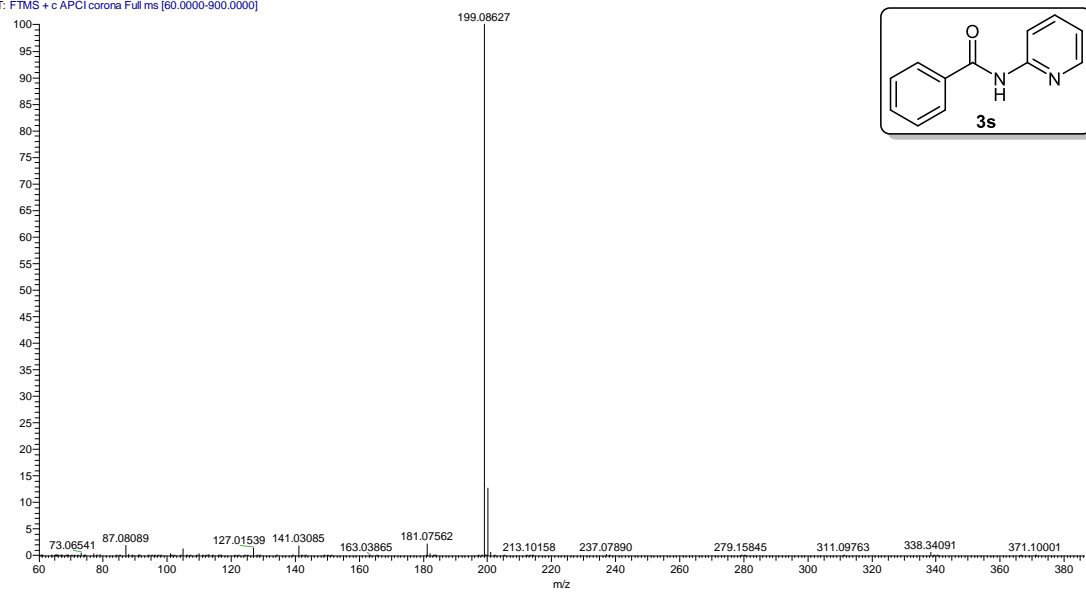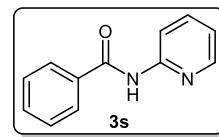



➤ <sup>1</sup>H-NMR spectrum for **3t**

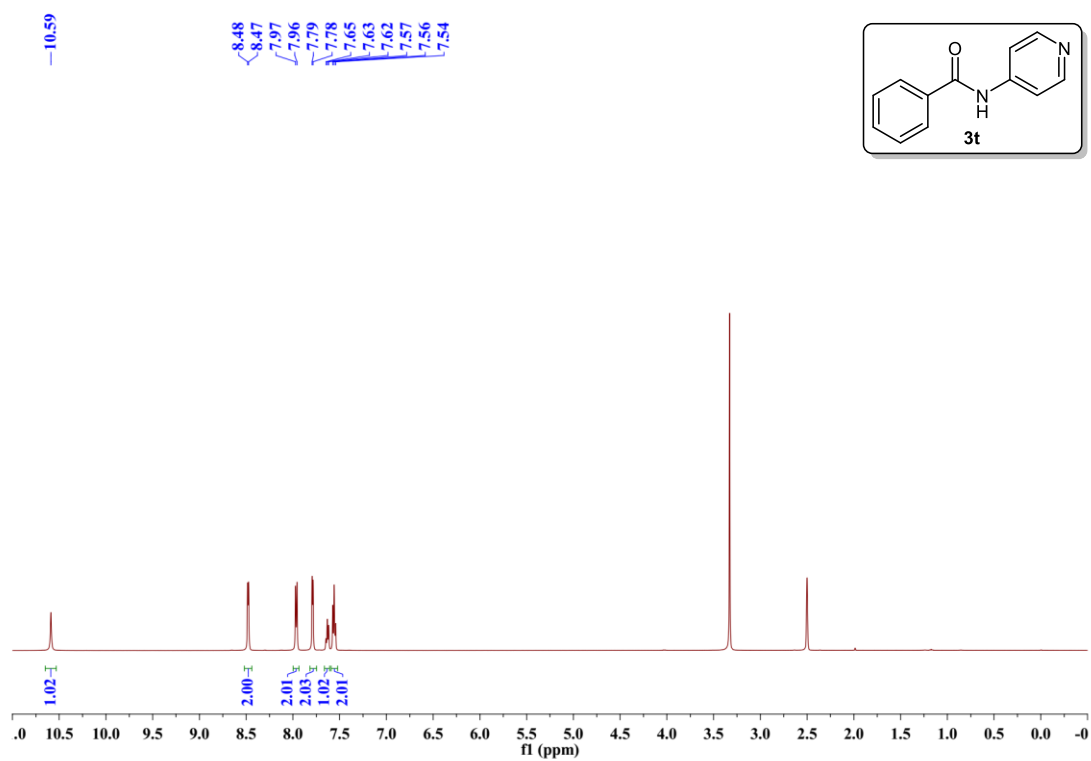

➤ <sup>13</sup>C-NMR spectrum for **3t**

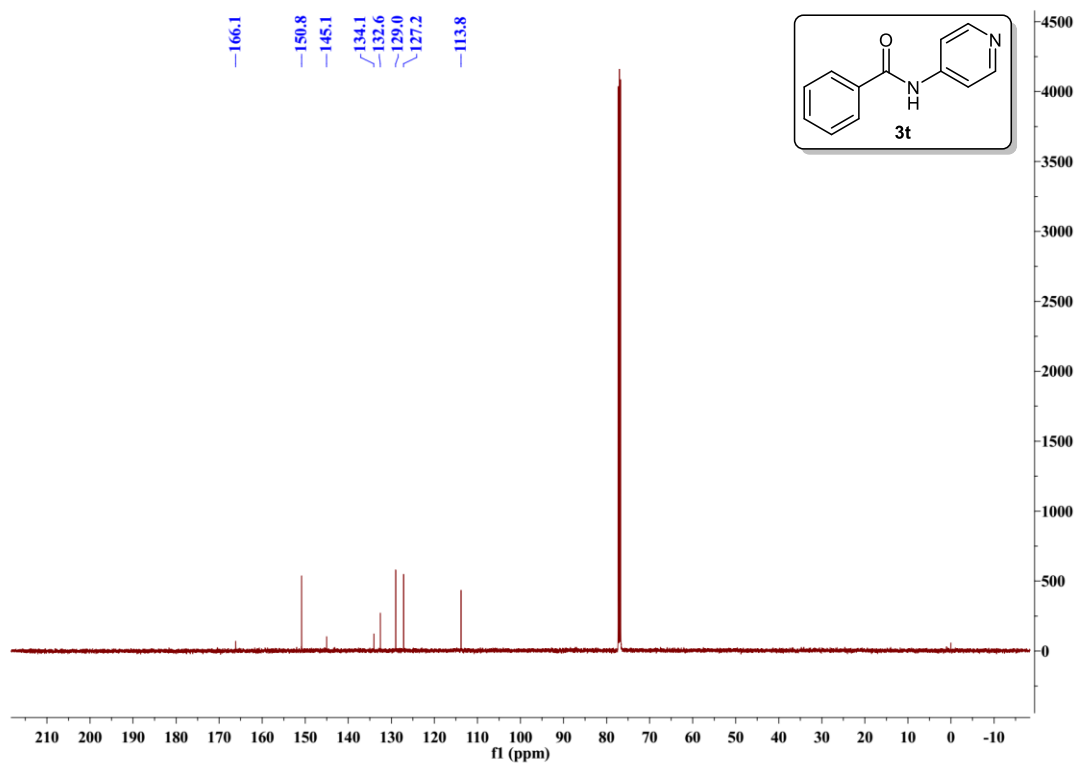

➤ HRMS spectrum for **3t**

3 #19 RT: 0.21 AV: 1 NL: 7.15E8  
T: FTMS + c APCI corona Full ms [60.0000-900.0000]

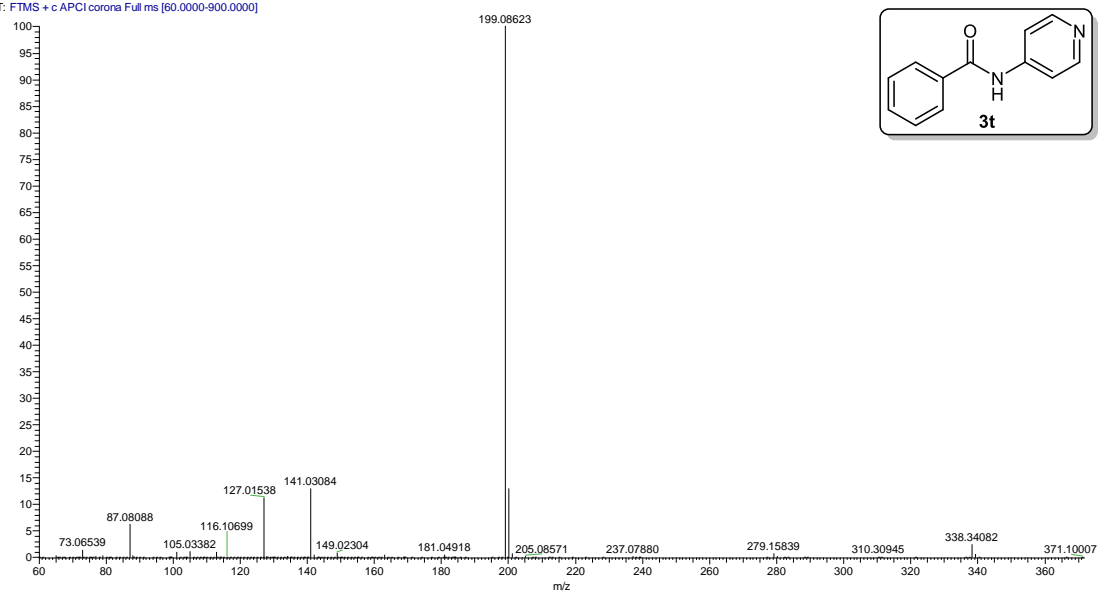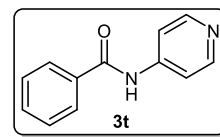

➤ <sup>1</sup>H-NMR spectrum for **3u**

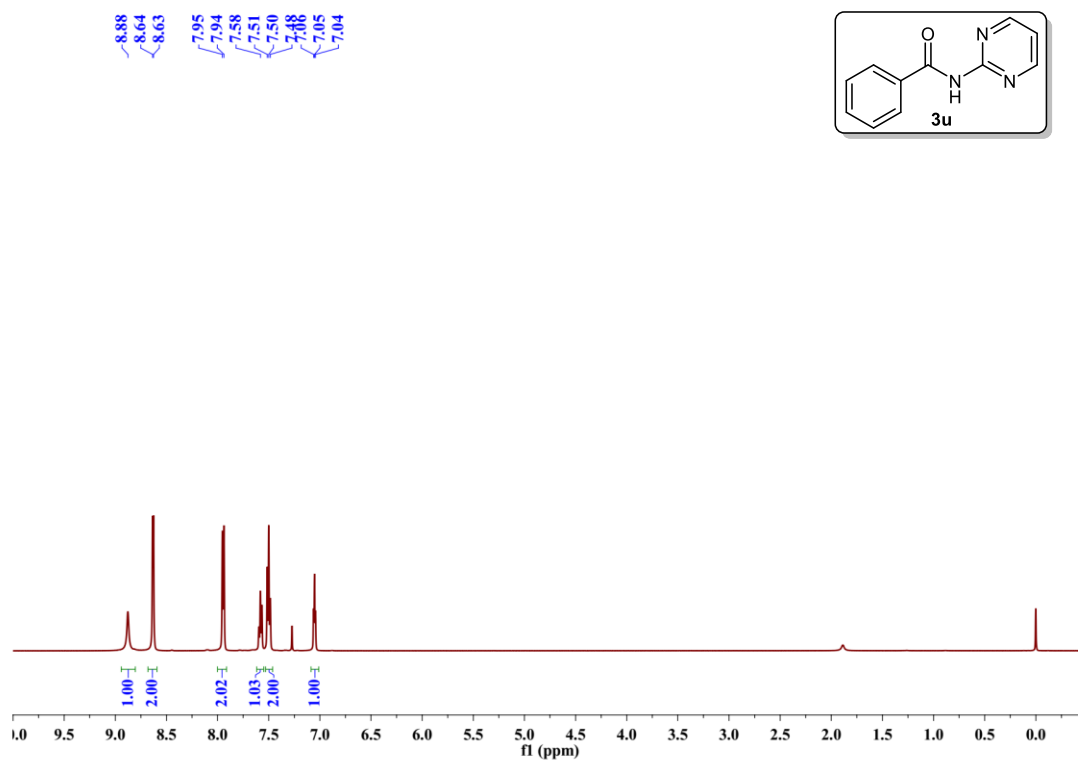

➤ <sup>13</sup>C-NMR spectrum for **3u**

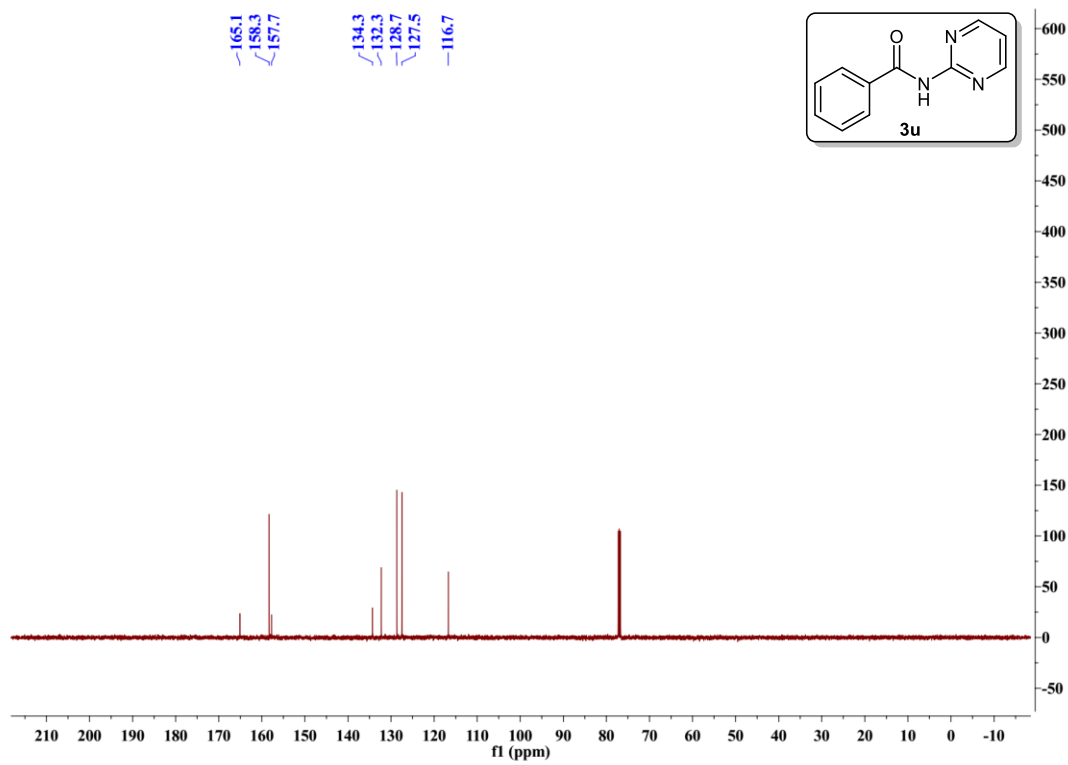

➤ HRMS spectrum for **3u**

20 #21 RT: 0.23 AV: 1 NL: 2.77E9  
T: FTMS + c APCI corona Full ms [60.0000-900.0000]

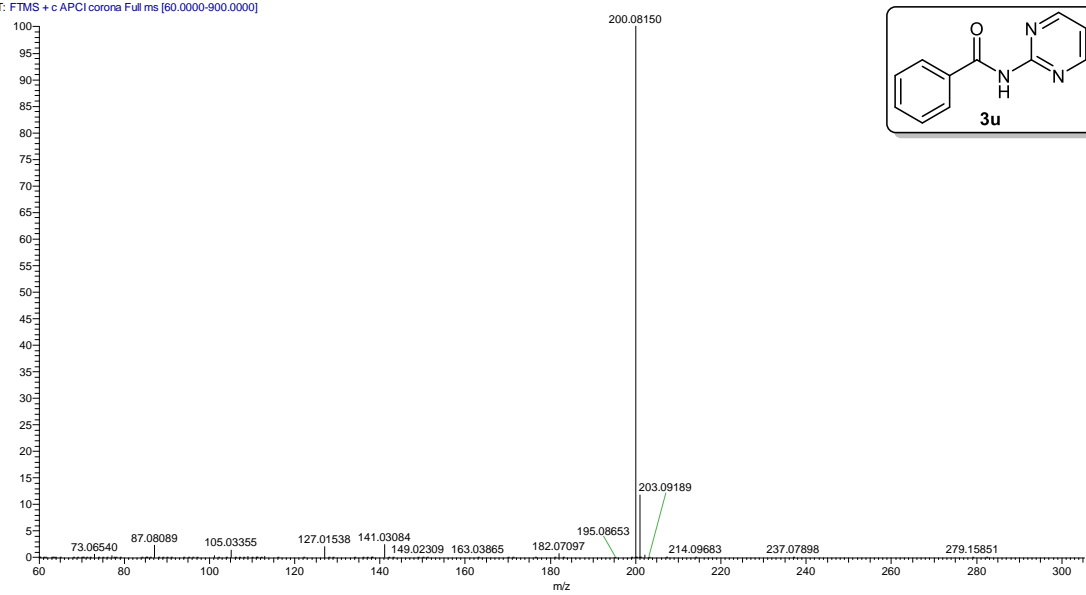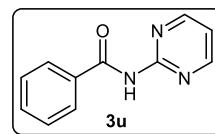

➤ <sup>1</sup>H-NMR spectrum for **3v**

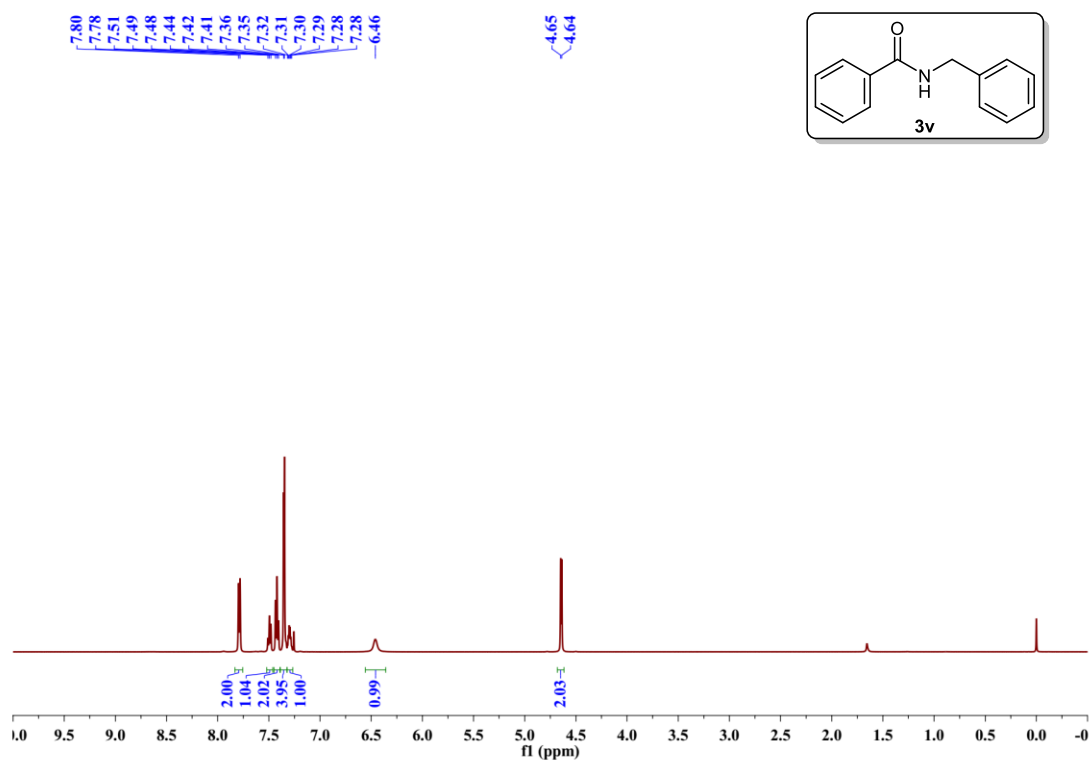

➤ <sup>13</sup>C-NMR spectrum for **3v**

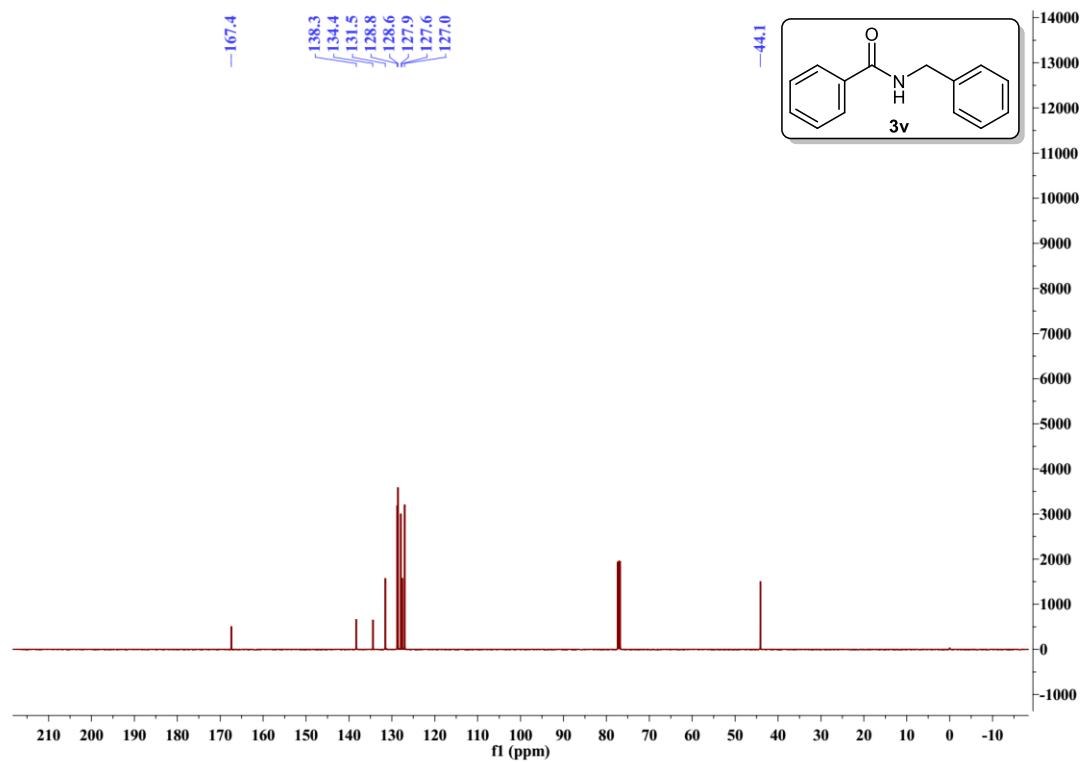

➤ HRMS spectrum for **3v**

8 #19 RT: 0.21 AV: 1 NL: 2.37E9  
T: FTMS + c APCI corona Full ms [60.0000-900.0000]

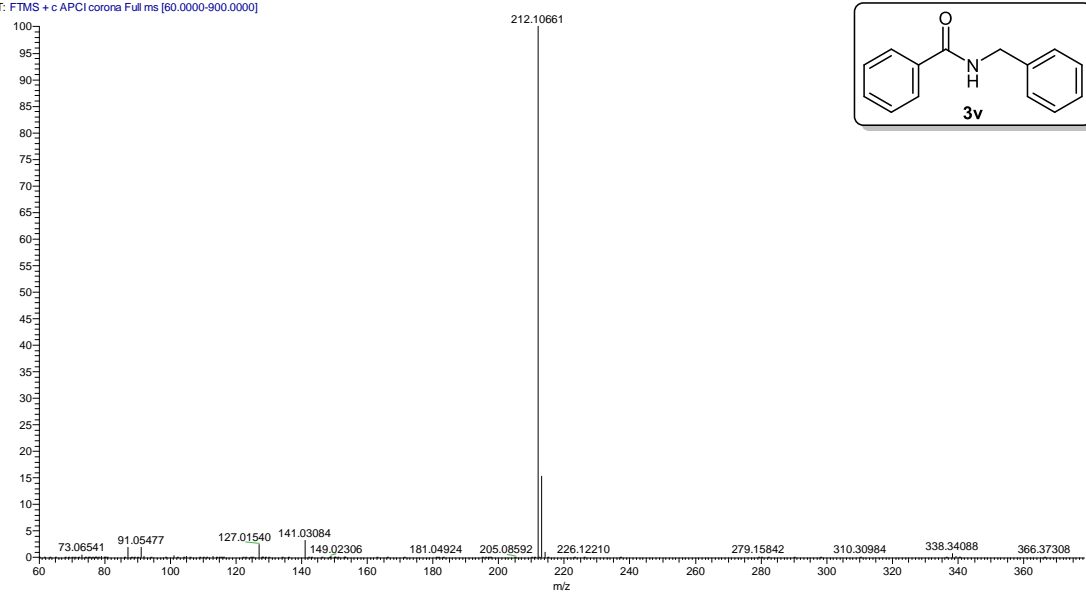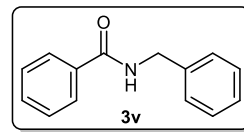

➤  $^1\text{H-NMR}$  spectrum for **3w**

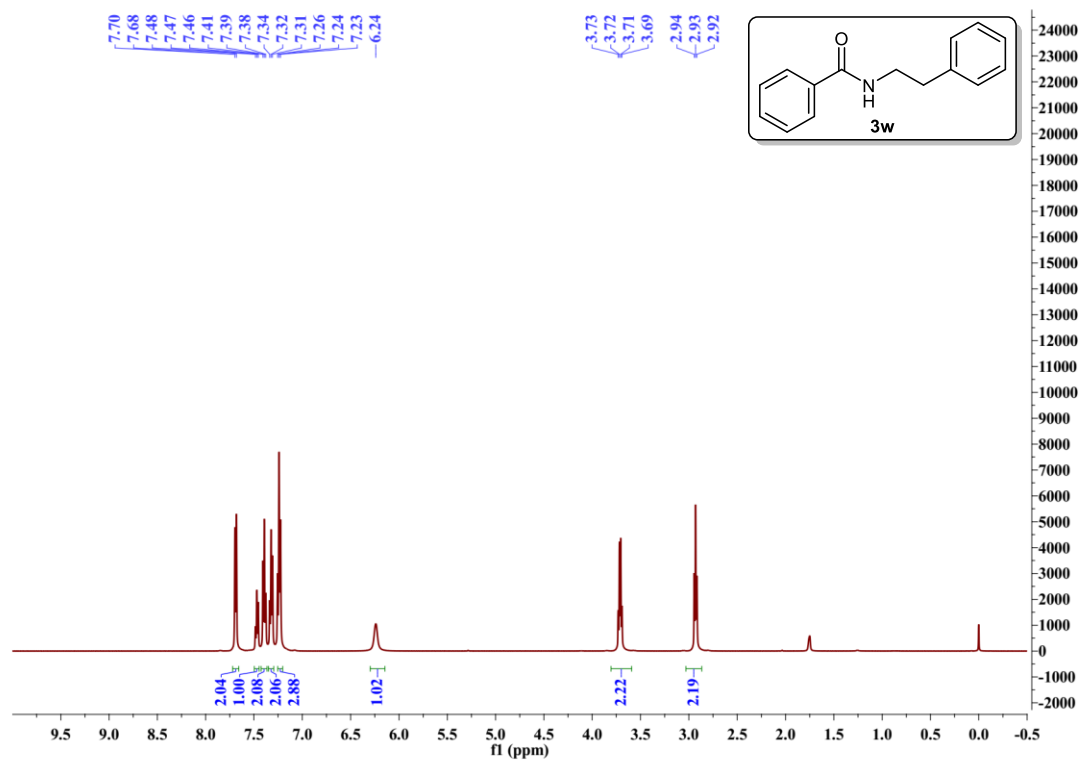

➤  $^{13}\text{C-NMR}$  spectrum for **3w**

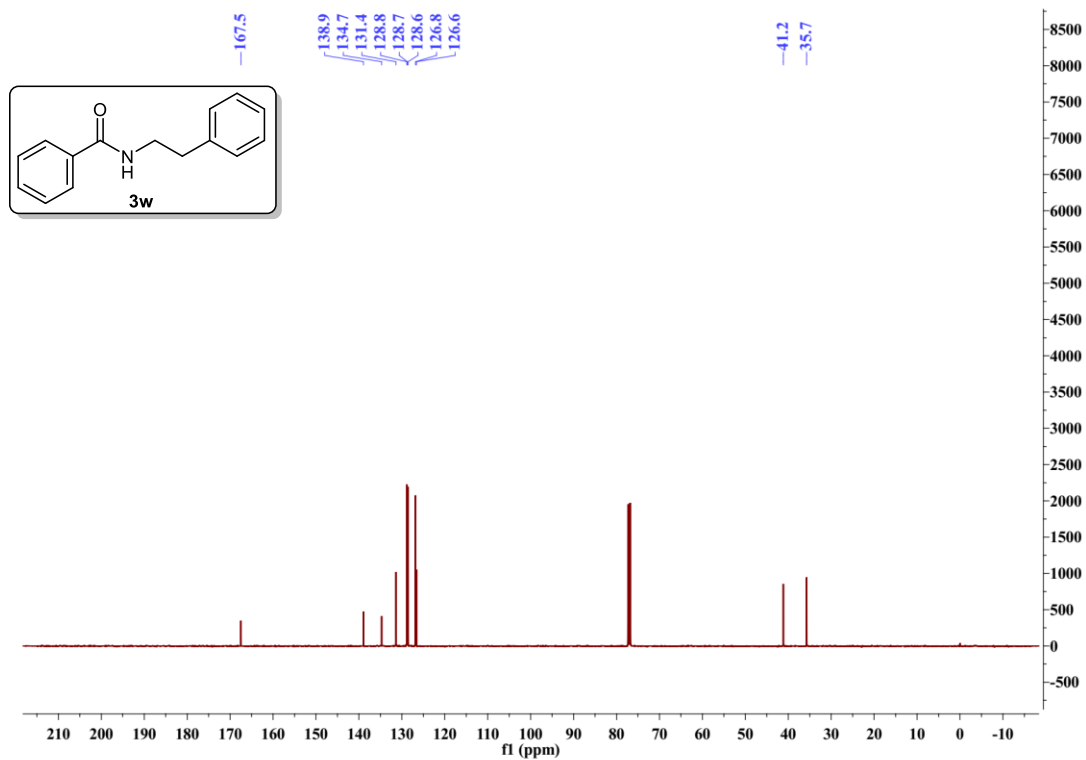

➤ HRMS spectrum for **3w**

6 #19 RT: 0.21 AV: 1 NL: 1.63E9  
T: FTMS + c APCI corona Full ms [60.0000-900.0000]

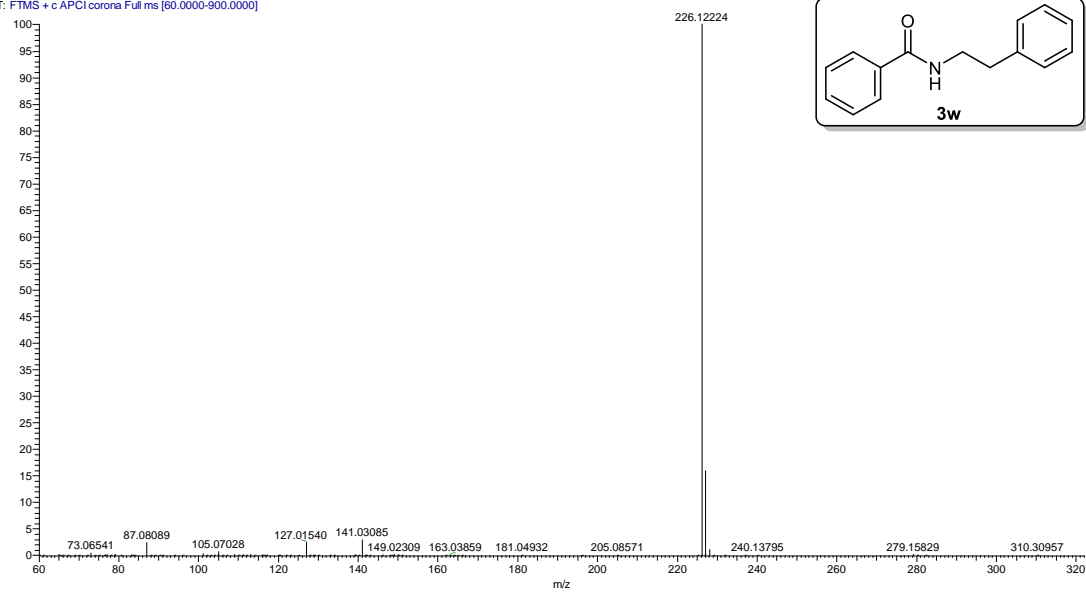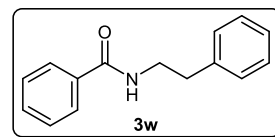



➤ <sup>1</sup>H-NMR spectrum for **3x**

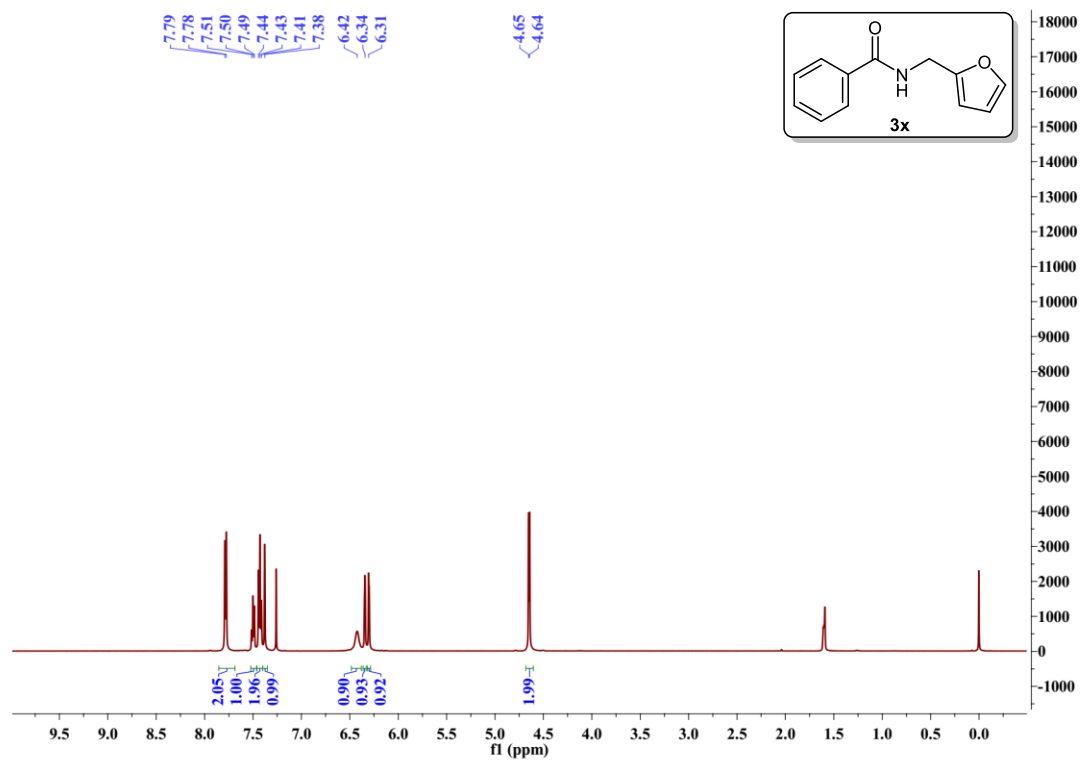

➤ <sup>13</sup>C-NMR spectrum for **3x**

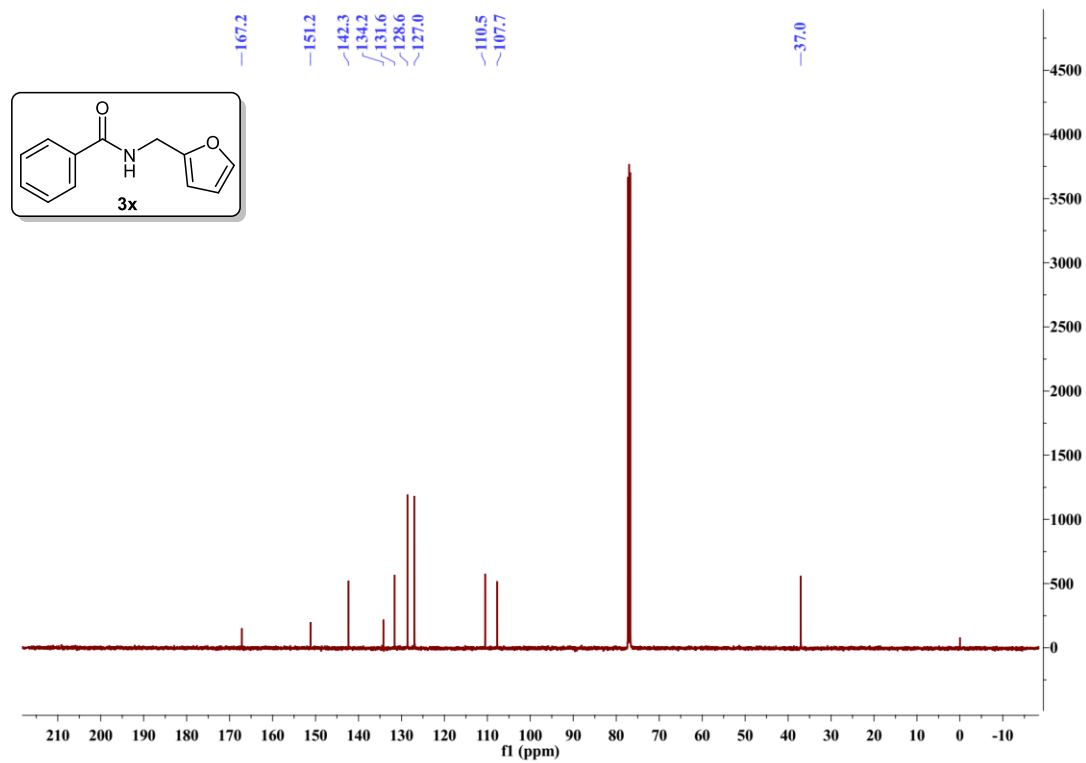

➤ HRMS spectrum for **3x**

42#19 RT: 0.21 AV: 1 NL: 1.31E9  
T: FTMS + c APCI corona Full ms [60.0000-900.0000]

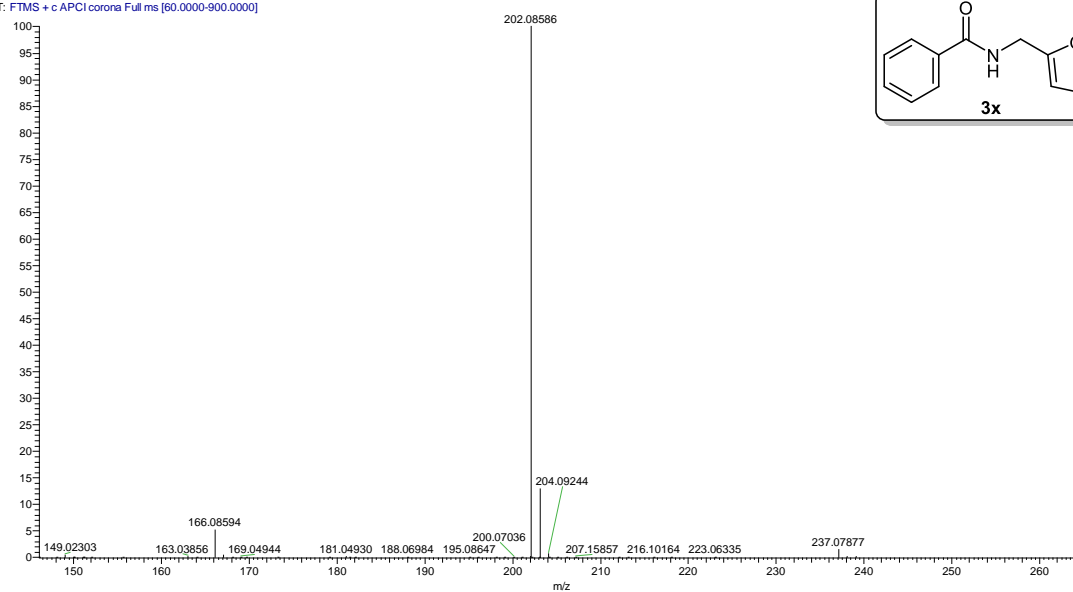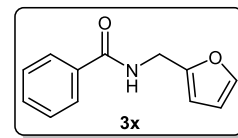

➤ <sup>1</sup>H-NMR spectrum for **3y**

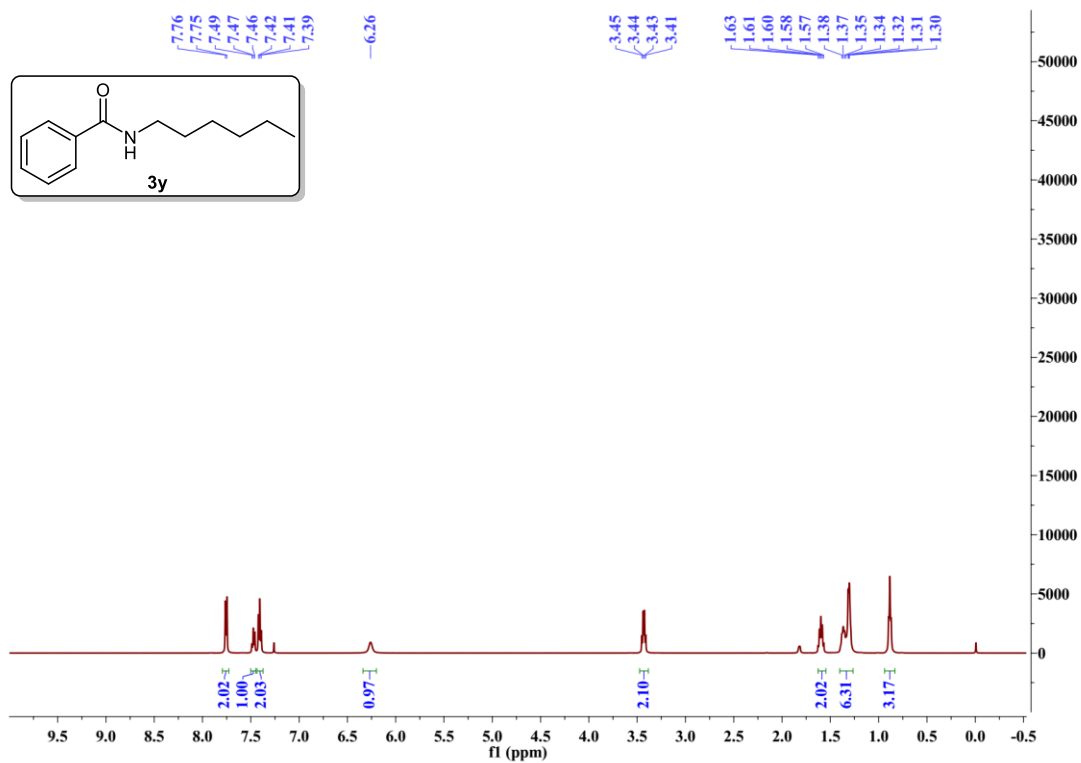

➤ <sup>13</sup>C-NMR spectrum for **3y**

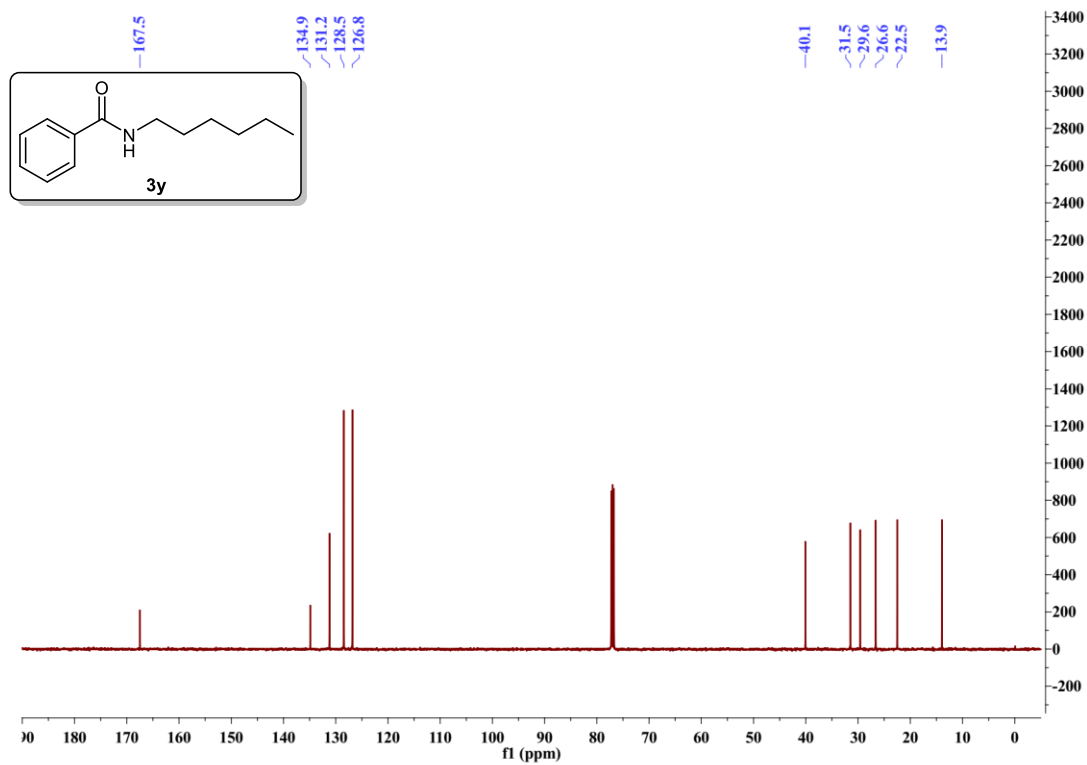

➤ HRMS spectrum for **3y**

9 #19 RT: 0.21 AV: 1 NL: 3.03E9  
T: FTMS + c APCI corona Full ms [60.0000-900.0000]

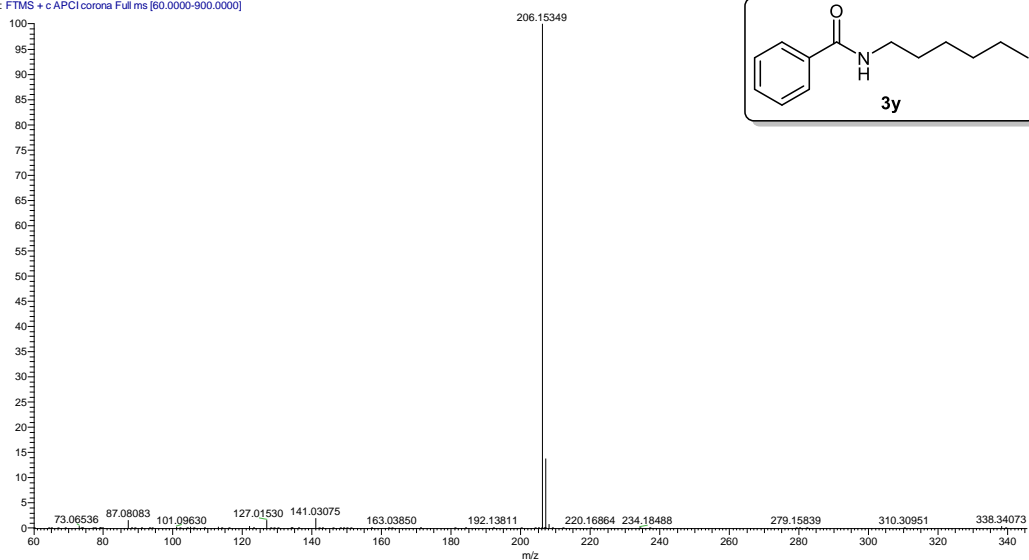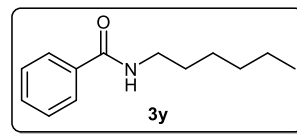

➤ <sup>1</sup>H-NMR spectrum for **3z**

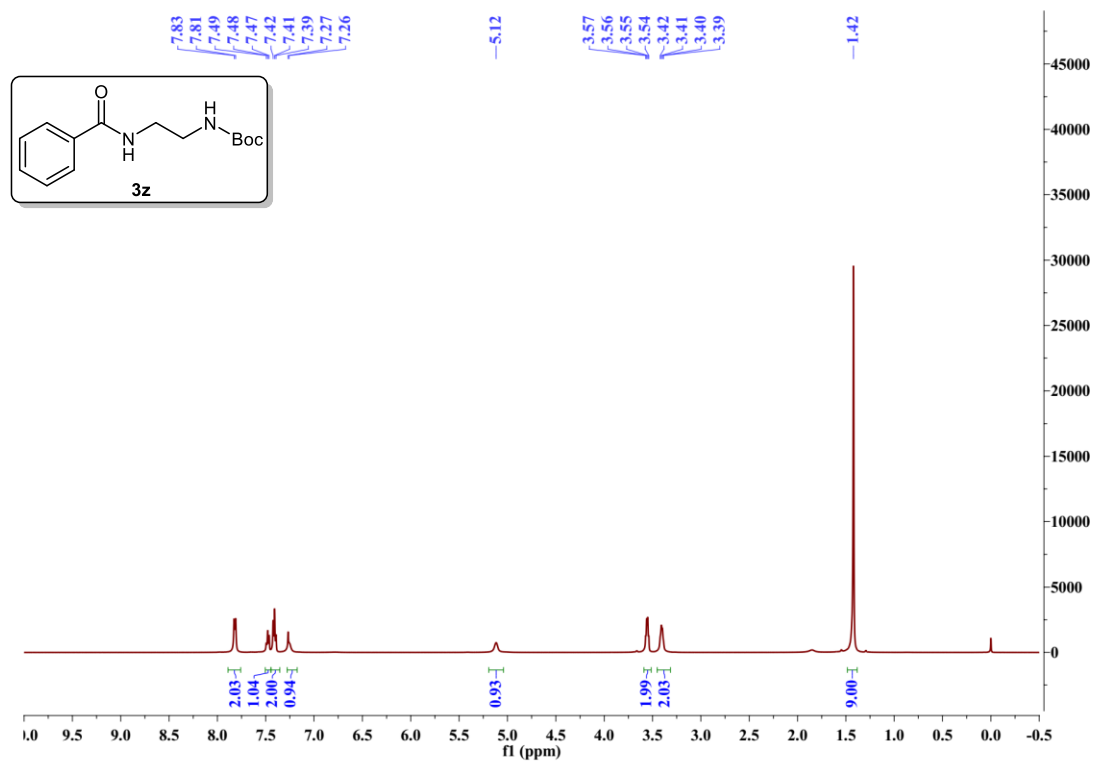

➤ <sup>13</sup>C-NMR spectrum for **3z**

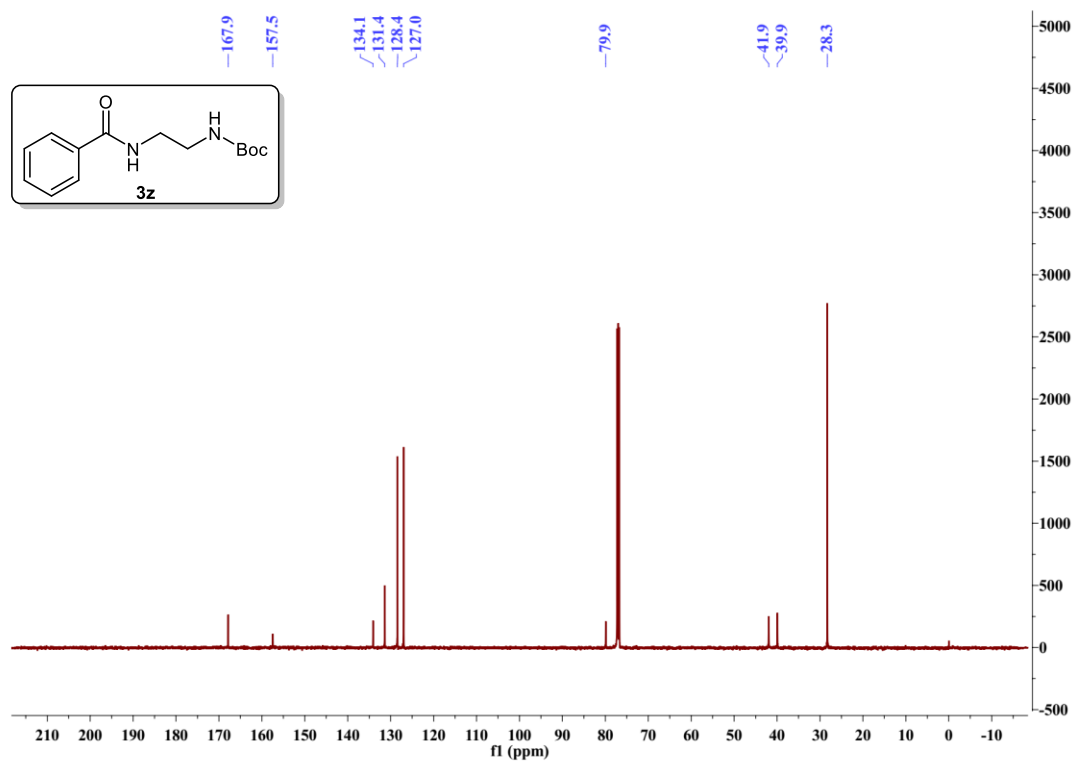

➤ HRMS spectrum for **3z**

10 #23 RT: 0.26 AV: 1 NL: 2.26E6  
T: FTMS + c APCI corona Full ms [60.0000-900.0000]

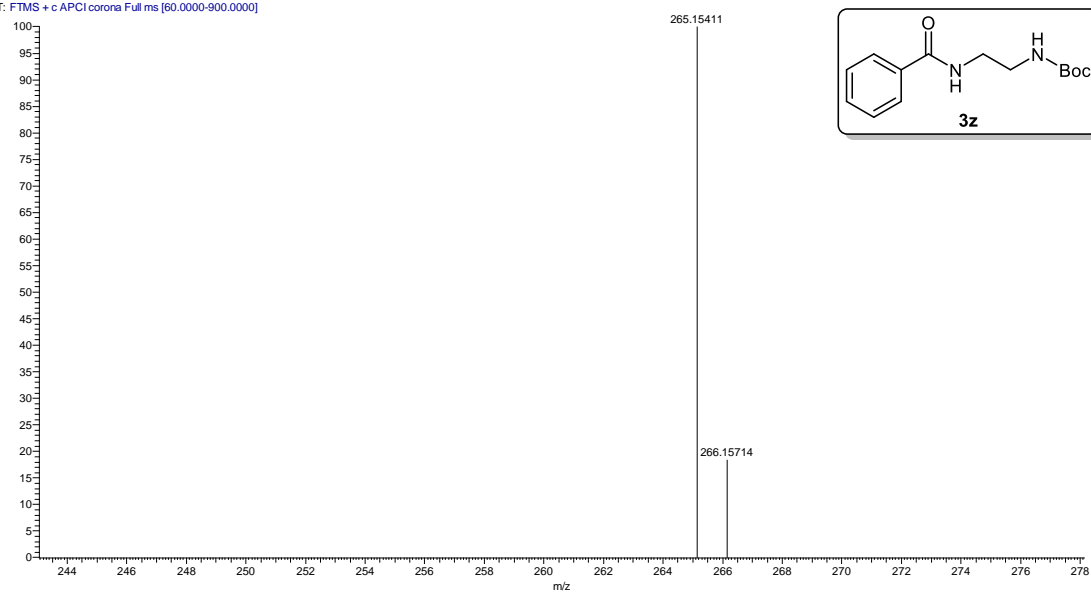

➤ <sup>1</sup>H-NMR spectrum for **3aa**

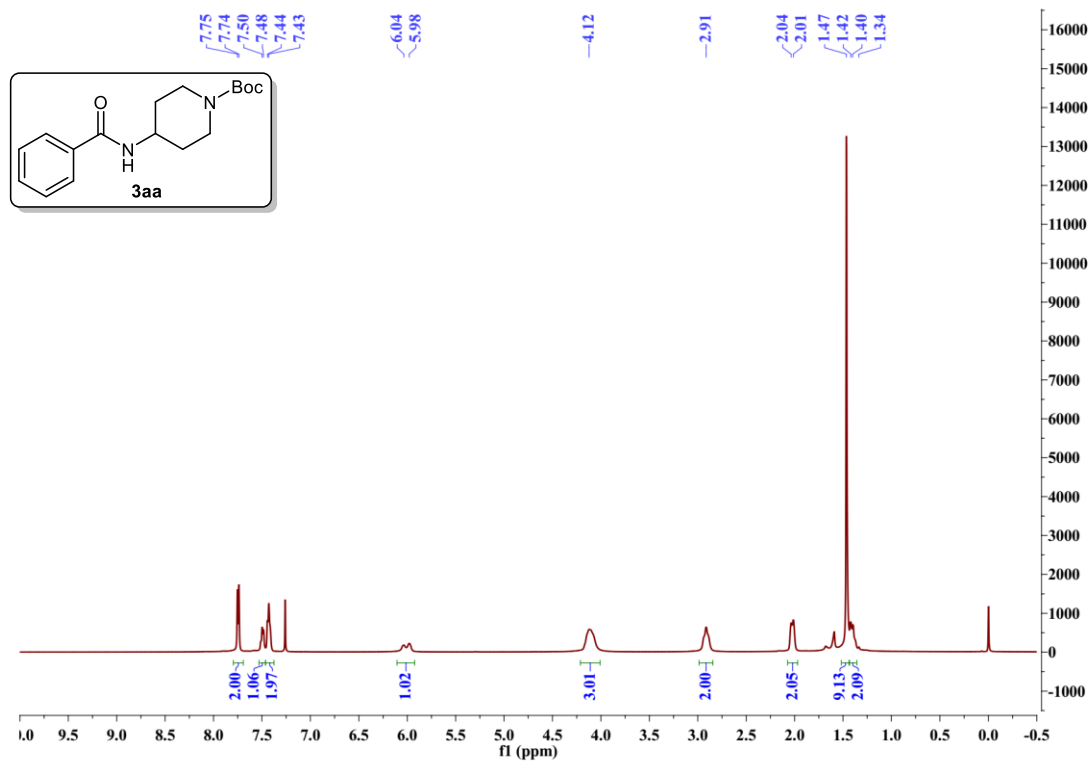

➤ <sup>13</sup>C-NMR spectrum for **3aa**

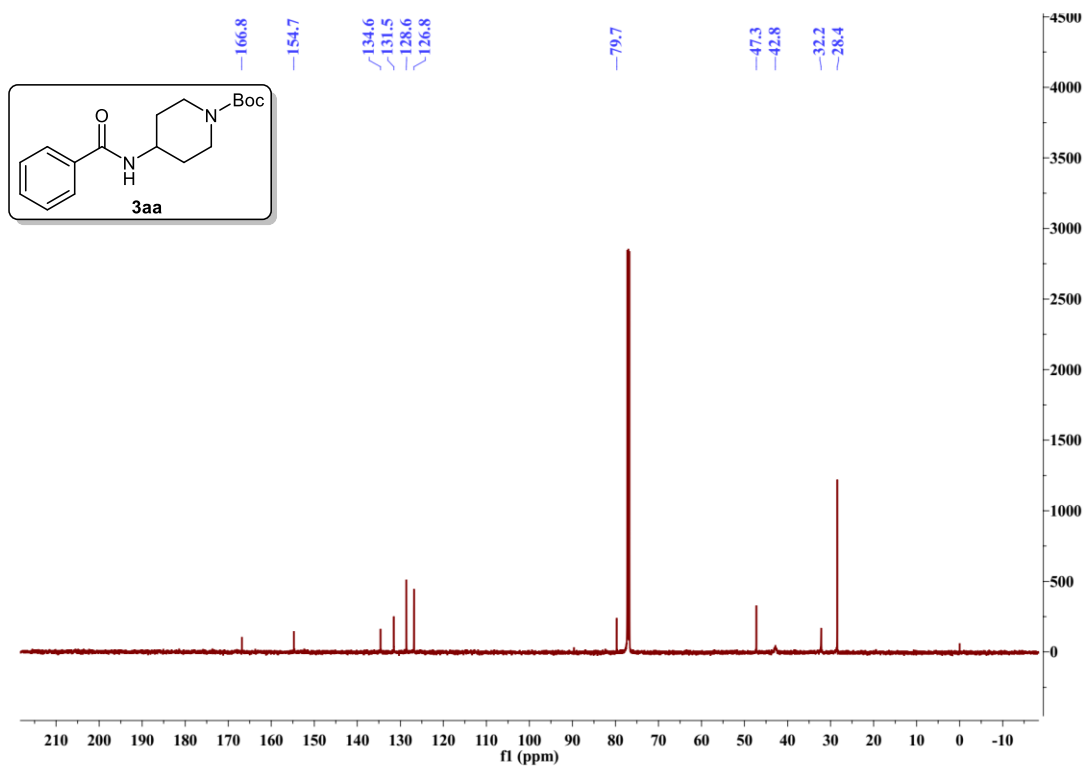

➤ HRMS spectrum for **3aa**

39 #20 RT: 0.22 AV: 1 NL: 9.34E7  
T: FTMS - c-APCI/corona Full ms [60.0000-900.0000]

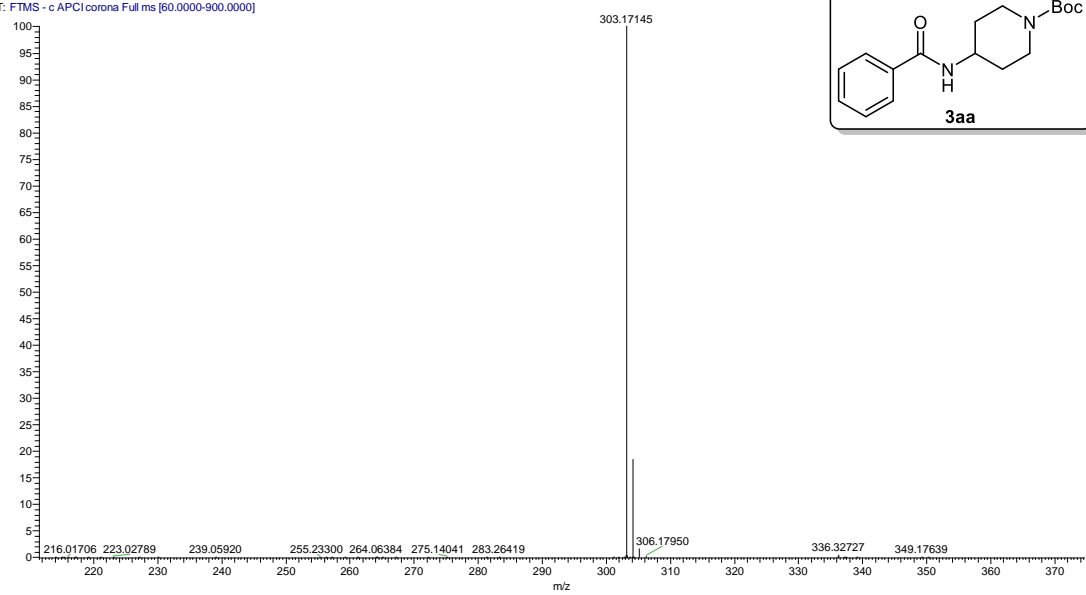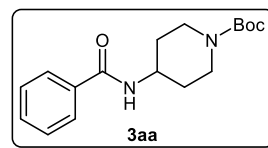



➤ <sup>1</sup>H-NMR spectrum for **3ab**

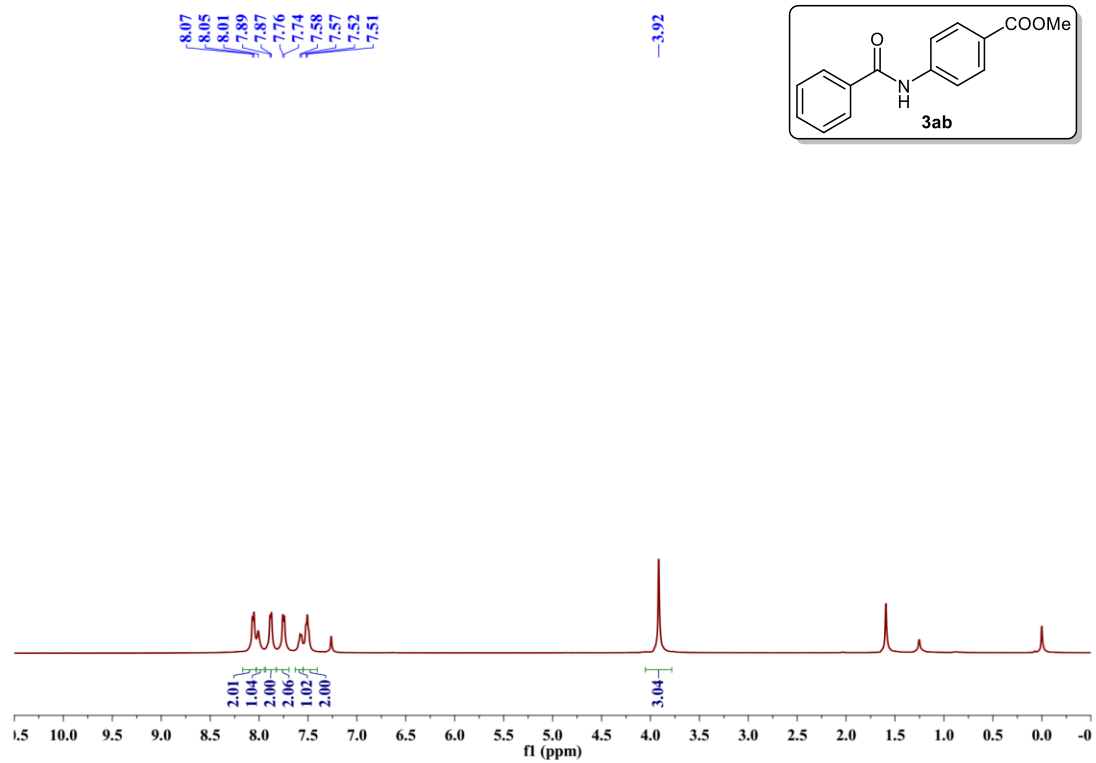

➤ <sup>13</sup>C-NMR spectrum for **3ab**

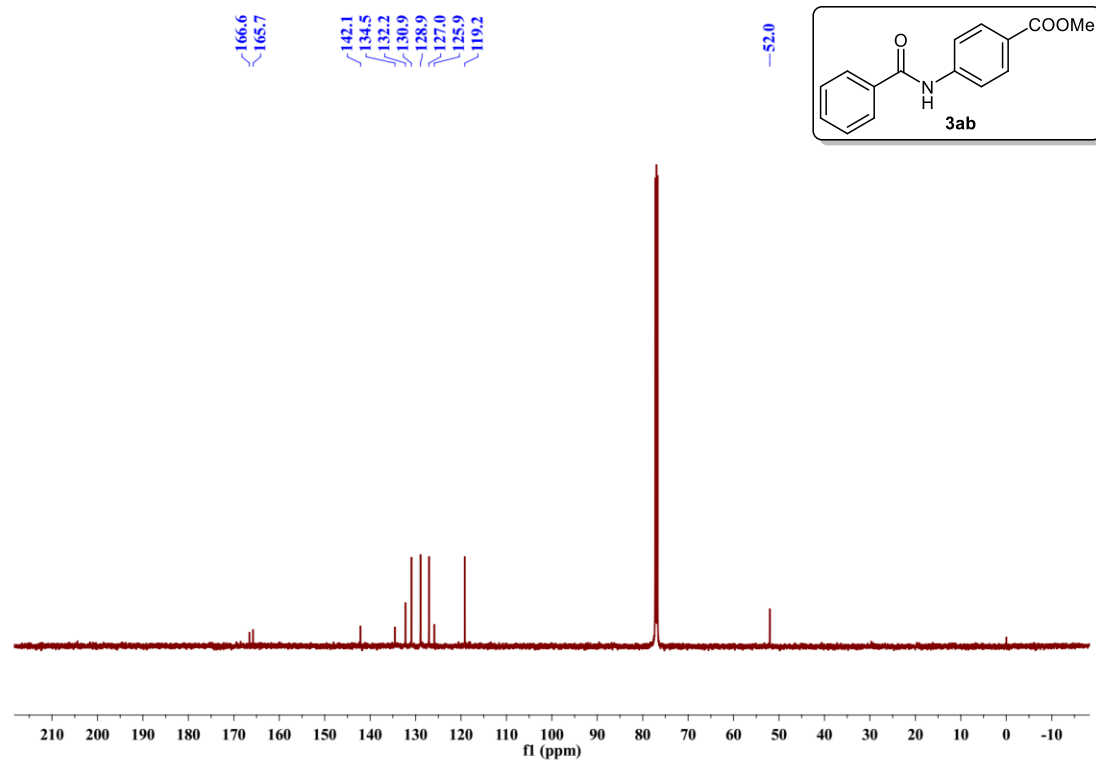

➤ HRMS spectrum for **3ab**

11 #19 RT: 0.21 AV: 1 NL: 4.14E9  
T: FTMS + c APCI corona Full ms [60.0000-900.0000]

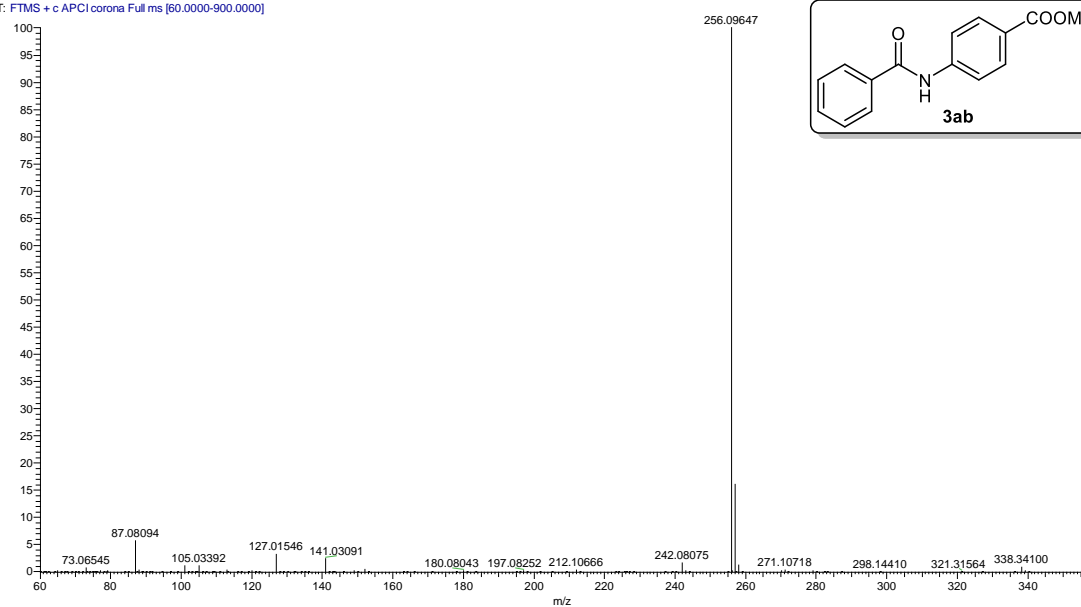

➤  $^1\text{H-NMR}$  spectrum for **3ac**

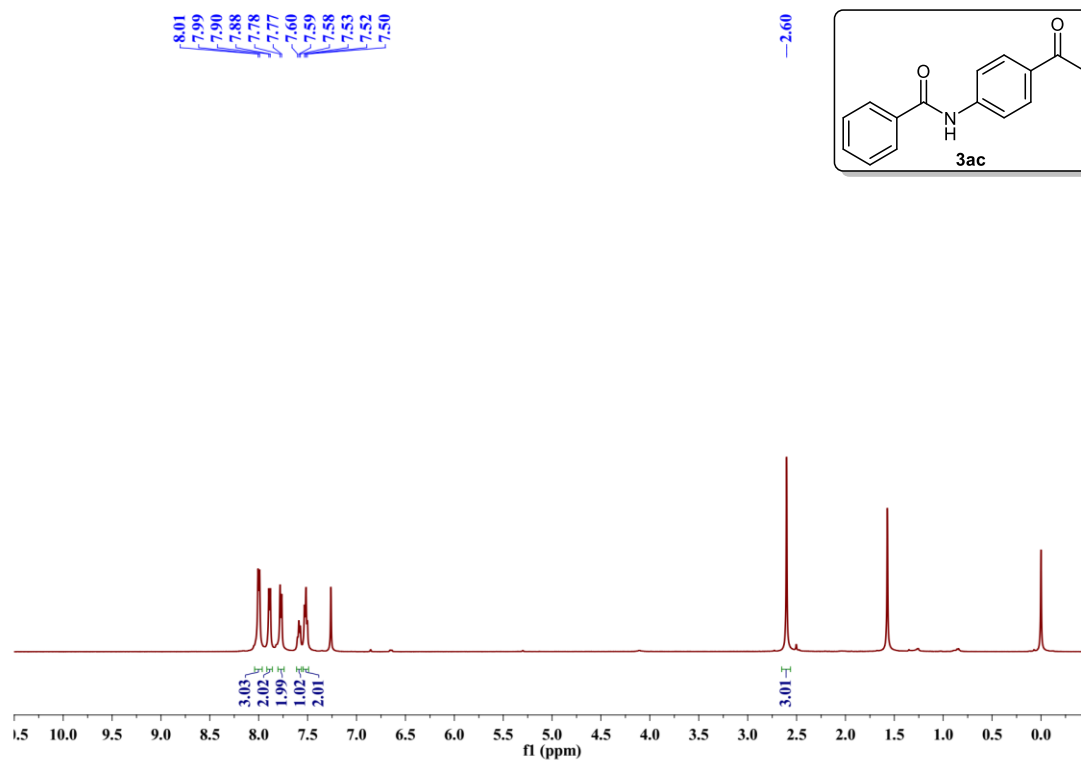

➤  $^{13}\text{C-NMR}$  spectrum for **3ac**

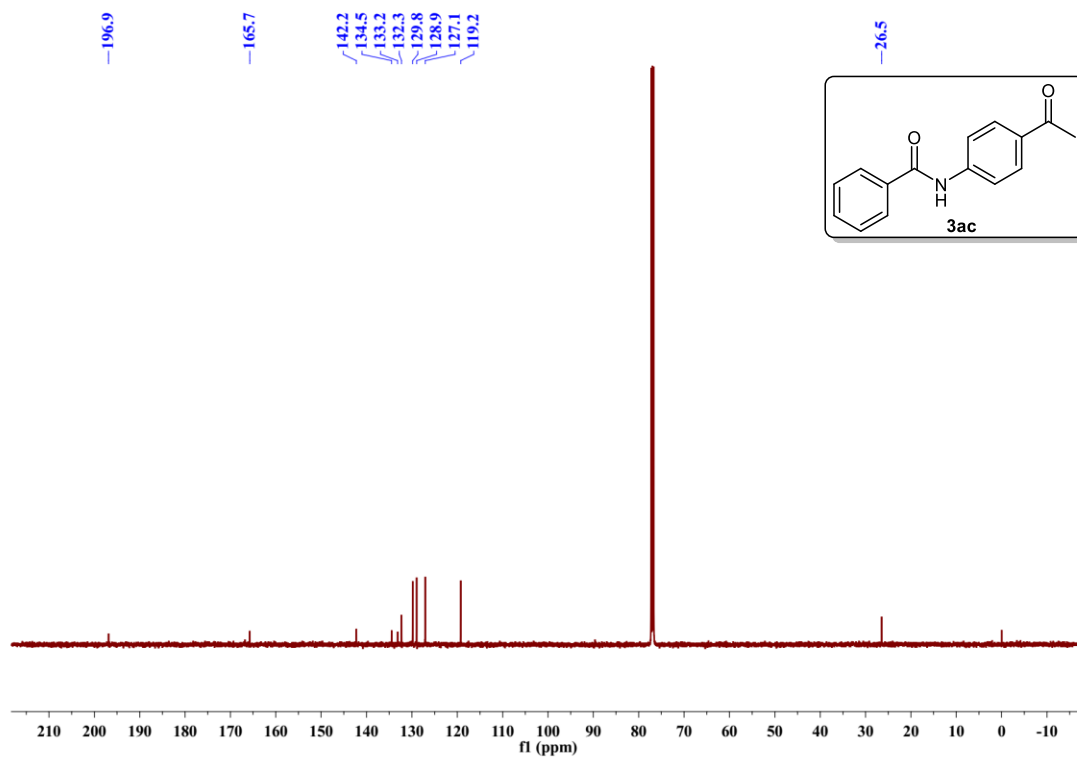

➤ HRMS spectrum for **3ac**

6 #19 RT: 0.21 AV: 1 SB: 14 0.77-0.92 NL: 1.08E9  
T: FTMS + c APCI corona Full ms [60.0000-900.0000]

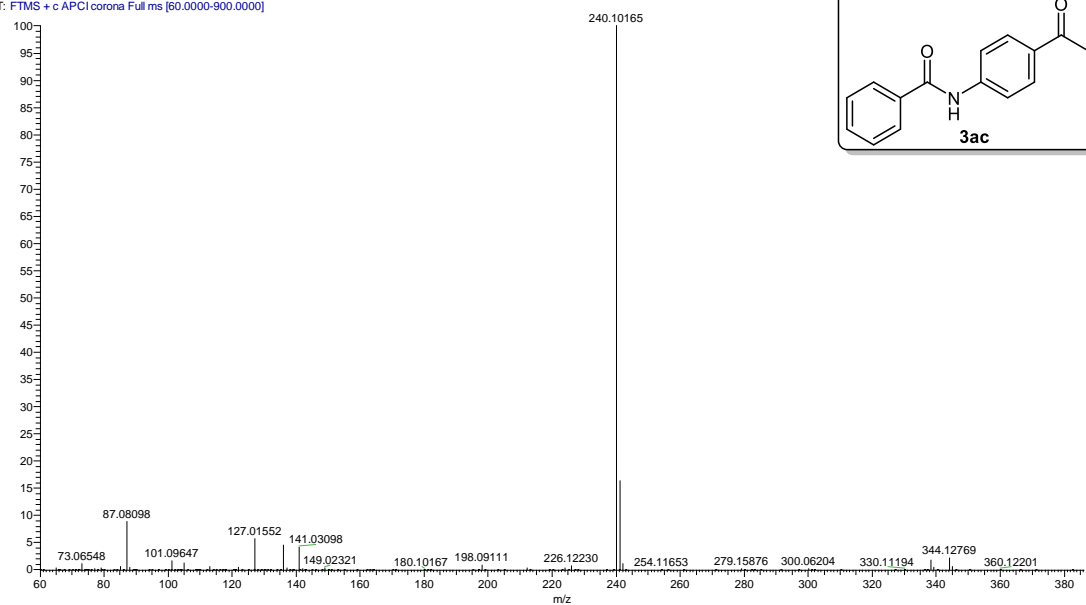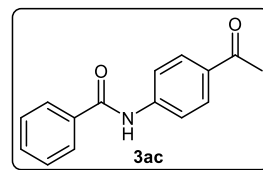

➤ <sup>1</sup>H-NMR spectrum for **3ad**

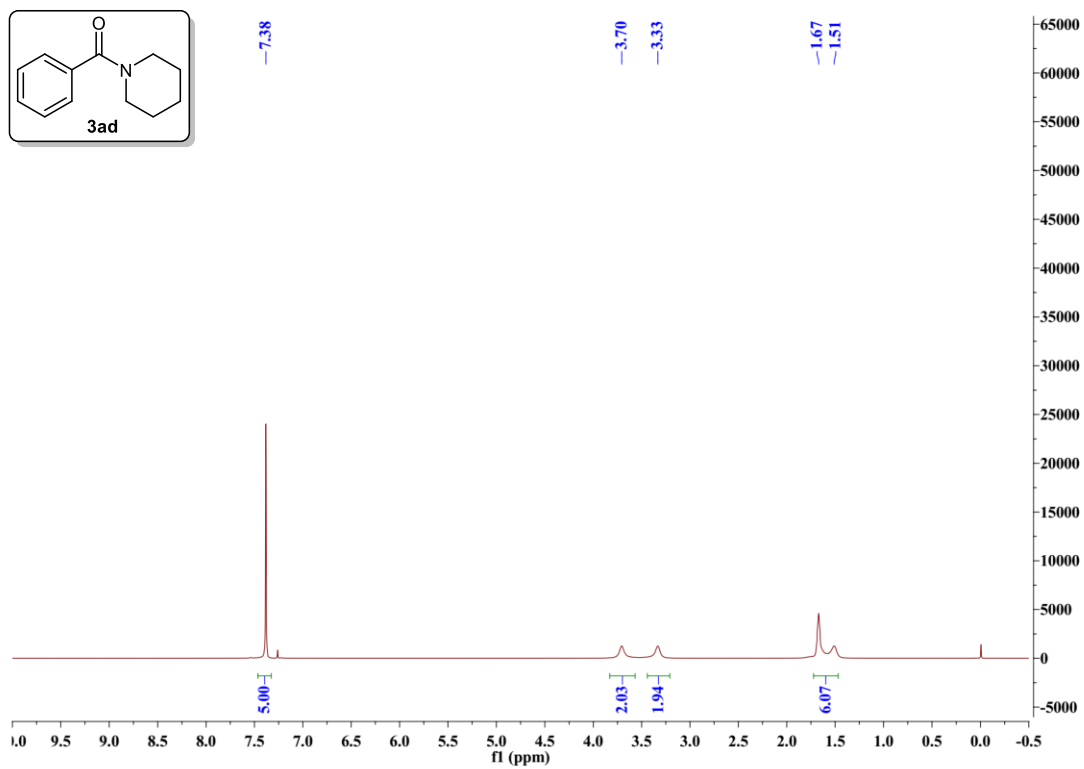

➤ <sup>13</sup>C-NMR spectrum for **3ad**

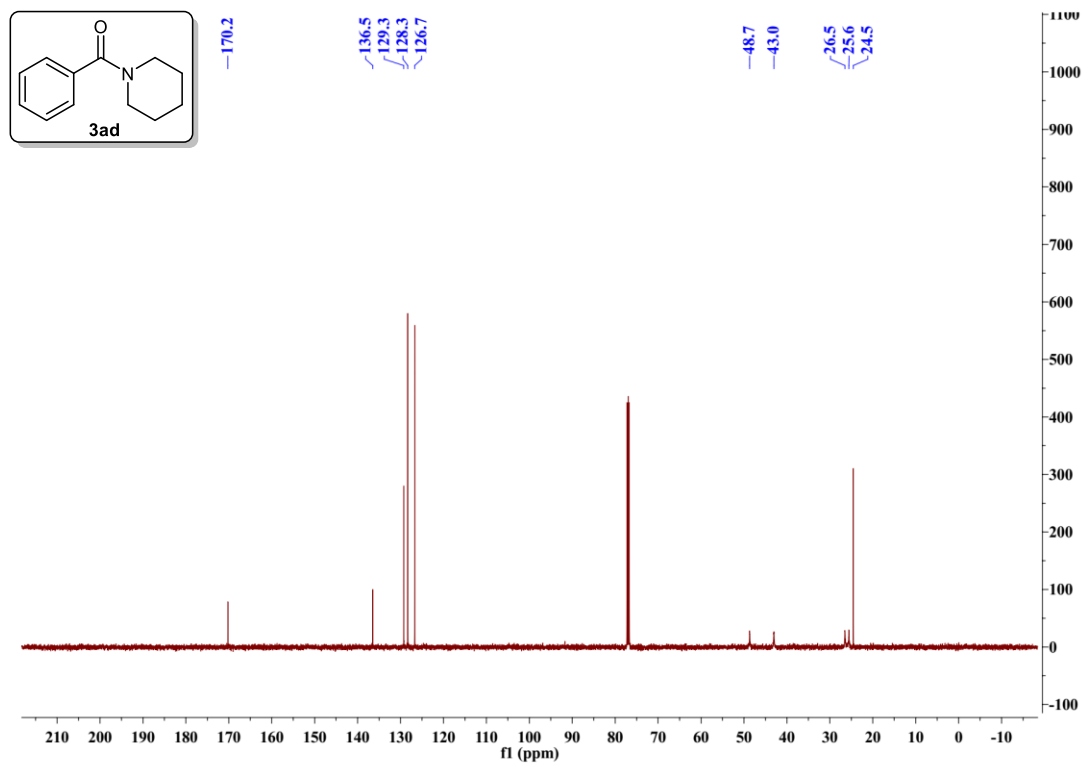

➤ <sup>1</sup>H-NMR spectrum for **3ae**

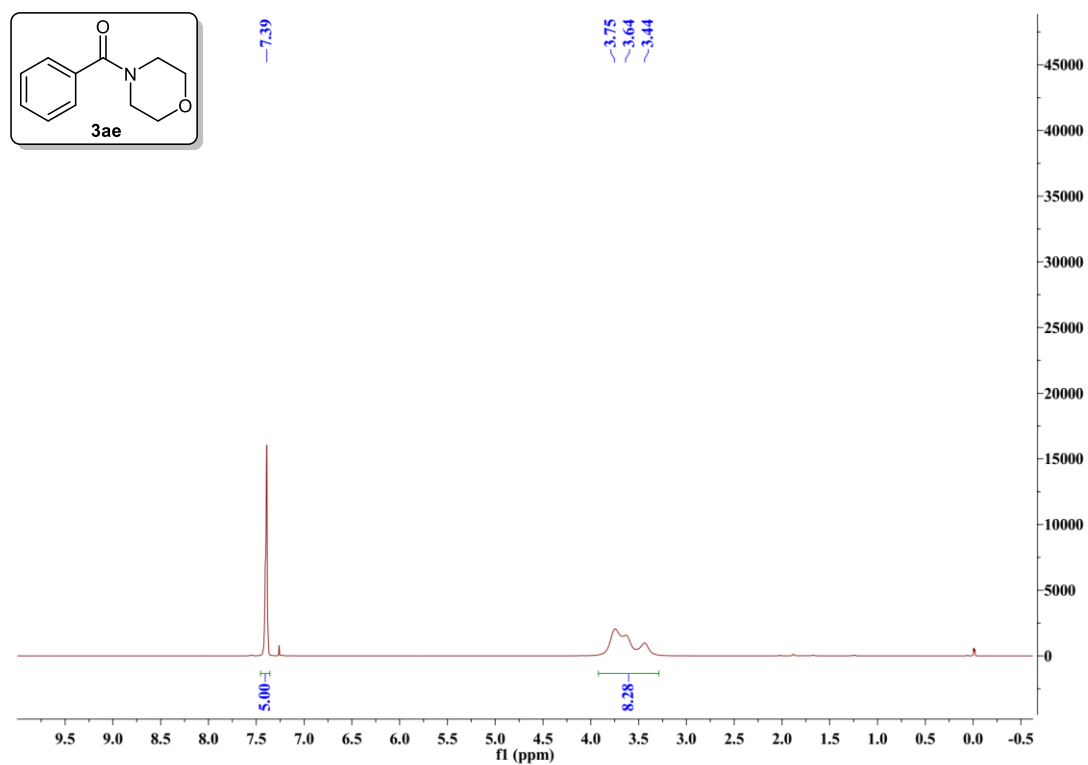

➤ <sup>13</sup>C-NMR spectrum for **3ae**

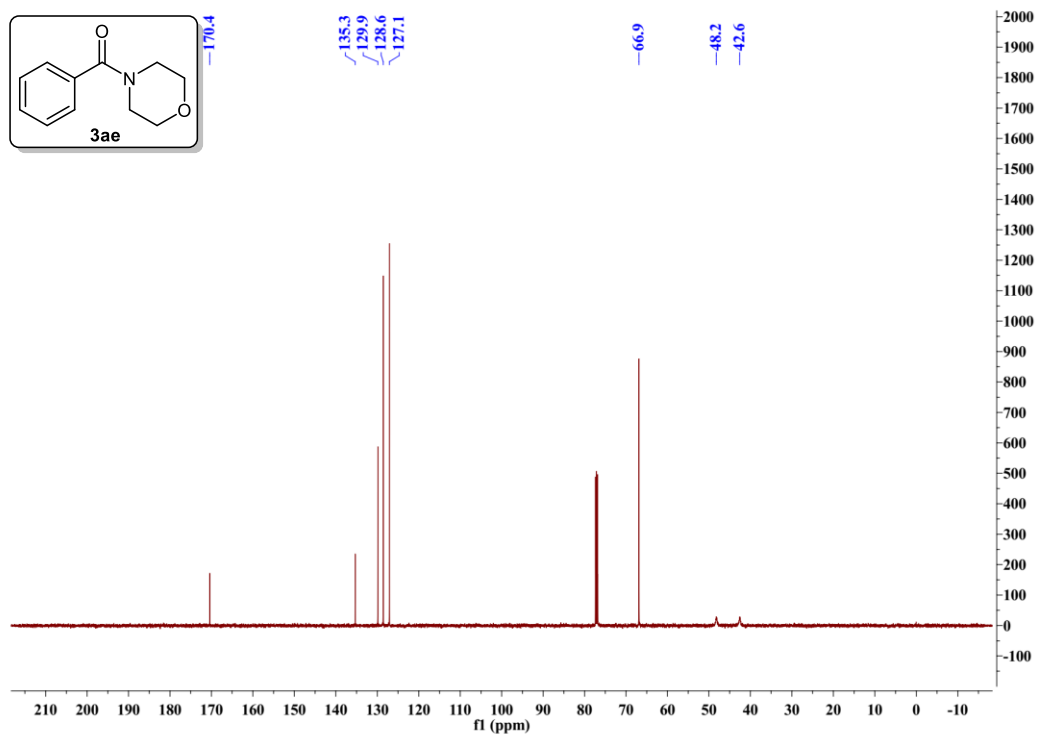

➤ <sup>1</sup>H-NMR spectrum for **3af**

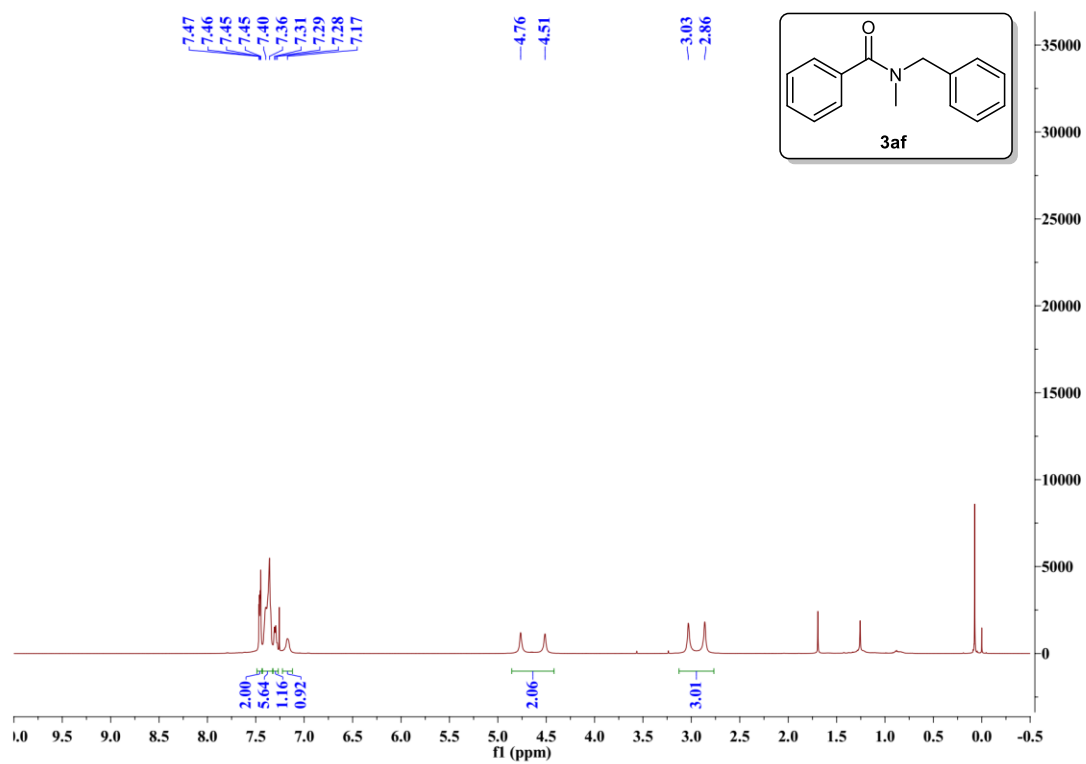

➤ <sup>13</sup>C-NMR spectrum for **3af**

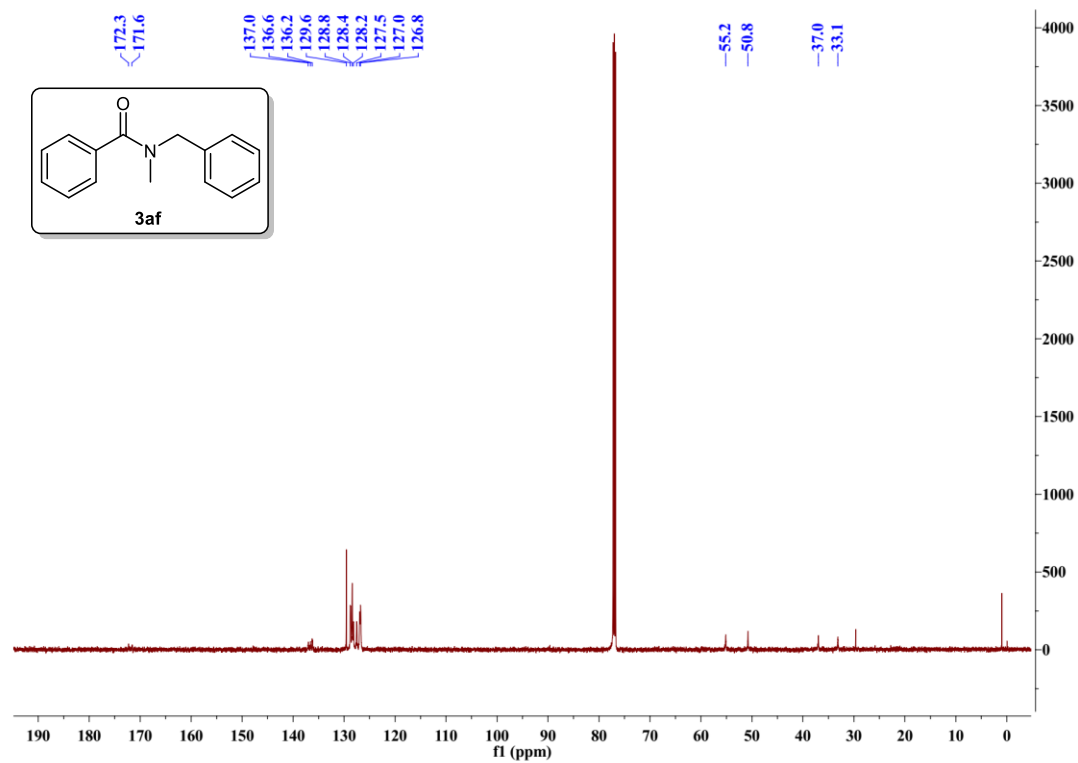

➤  $^1\text{H-NMR}$  spectrum for **3ag**

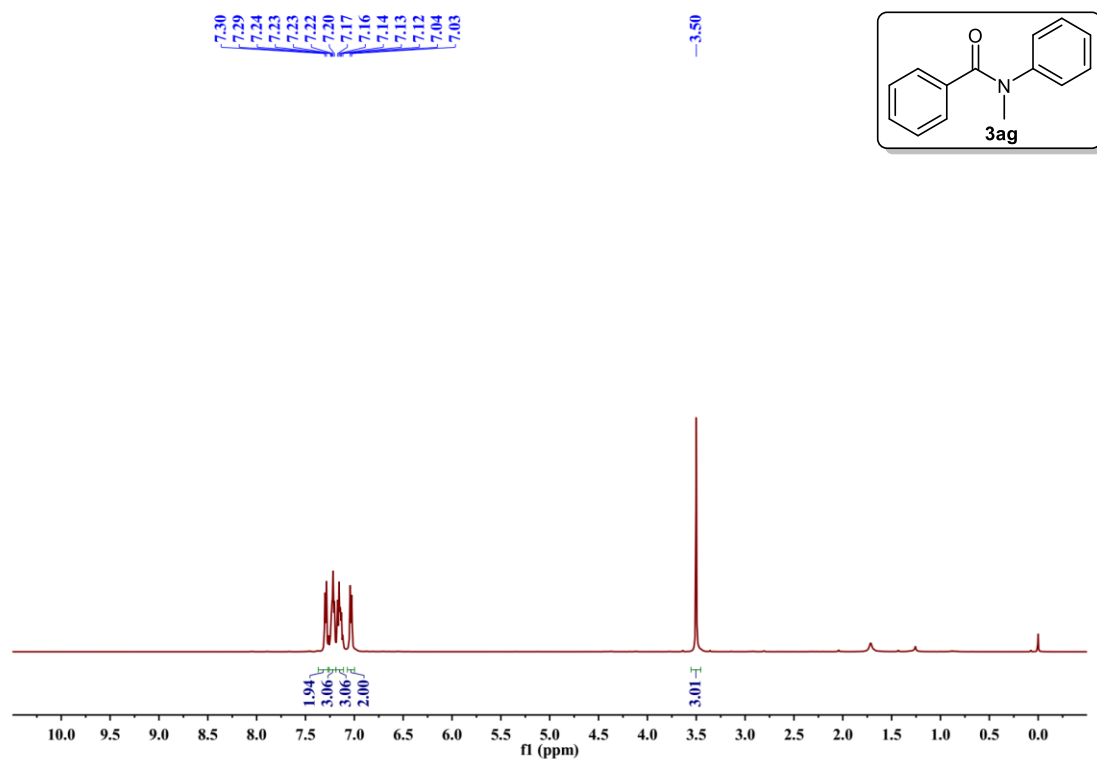

➤  $^{13}\text{C-NMR}$  spectrum for **3ag**

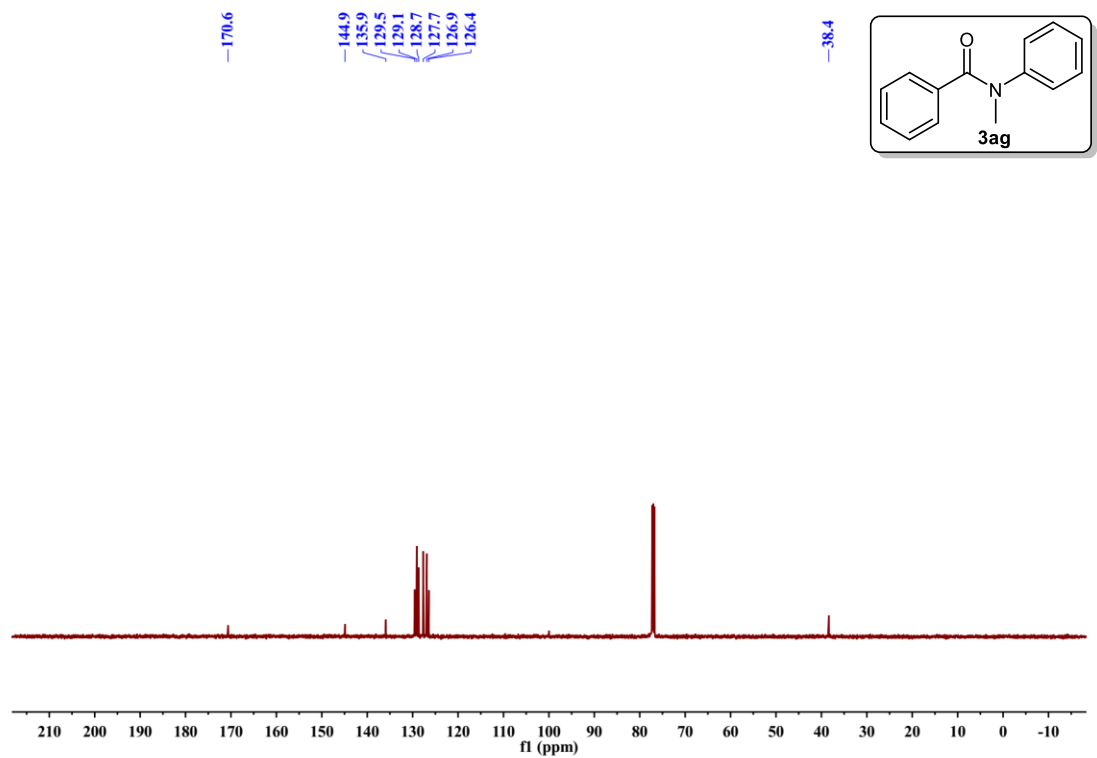



➤ HRMS spectrum for **3ag**

3 #19 RT: 0.21 AV: 1 NL: 2.04E10  
T: FTMS + c APCI corona Full ms [60.0000-900.0000]

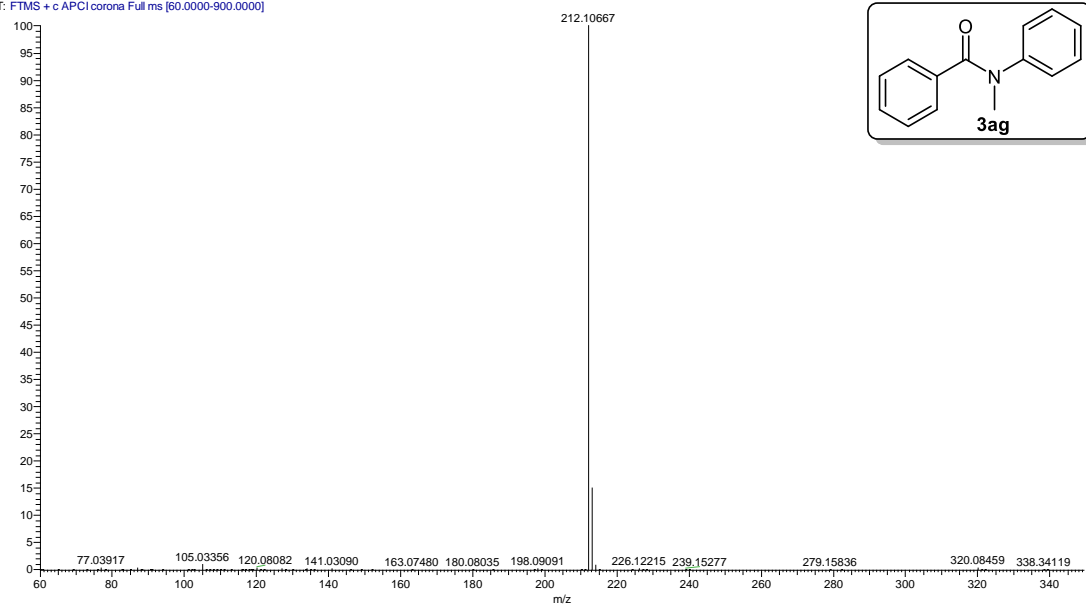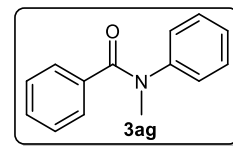

➤ <sup>1</sup>H-NMR spectrum for **3ah**

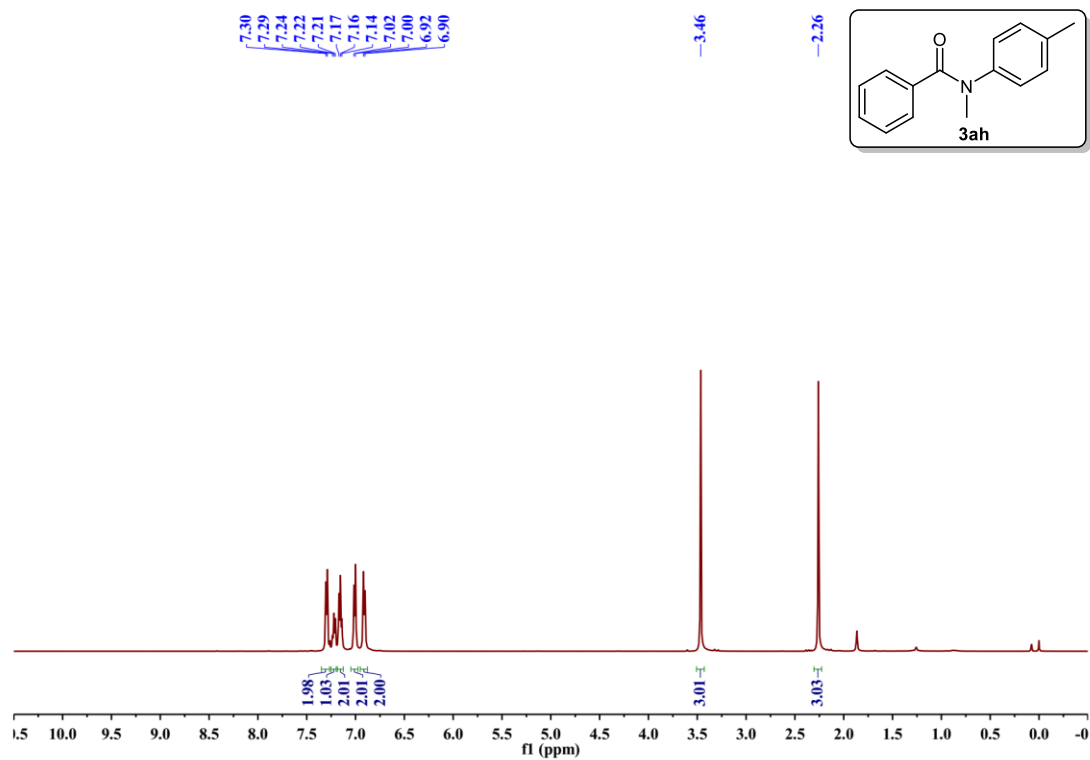

➤ <sup>13</sup>C-NMR spectrum for **3ah**

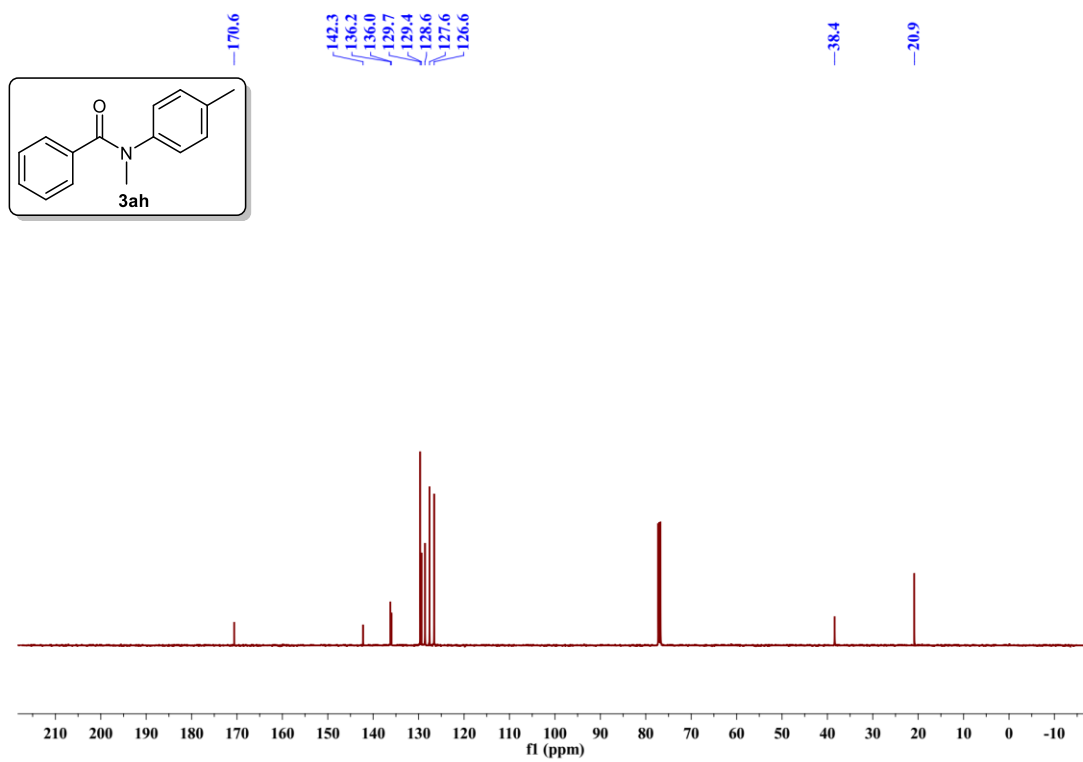

➤ HRMS spectrum for **3ah**

4 #17 RT: 0.19 AV: 1 NL: 1.87E10  
T: FTMS + c APCI corona Full ms [60.0000-900.0000]

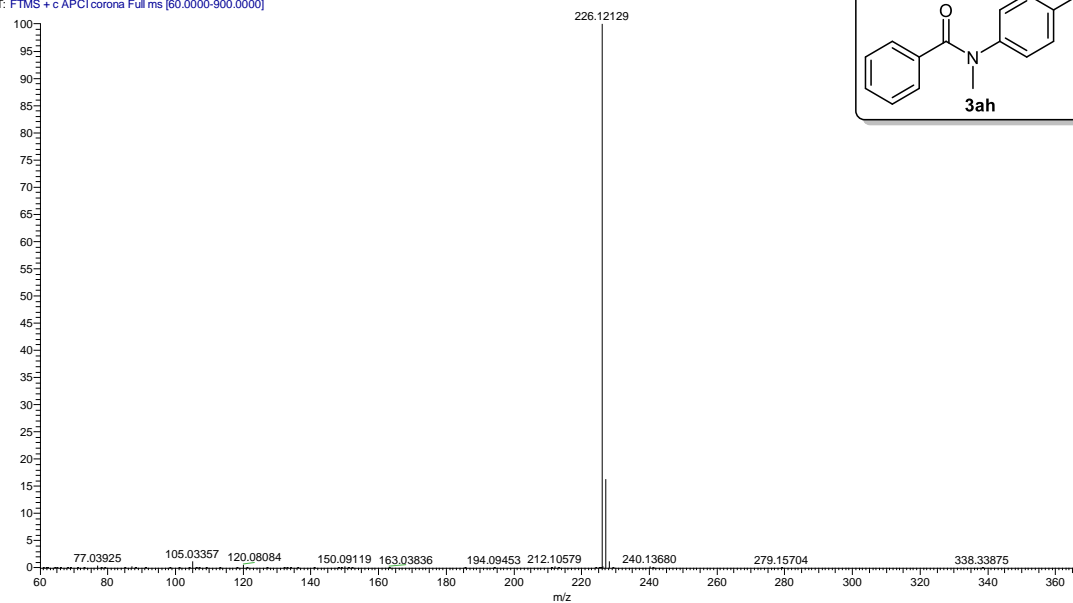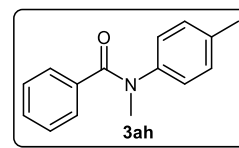

➤  $^1\text{H-NMR}$  spectrum for **3aj**

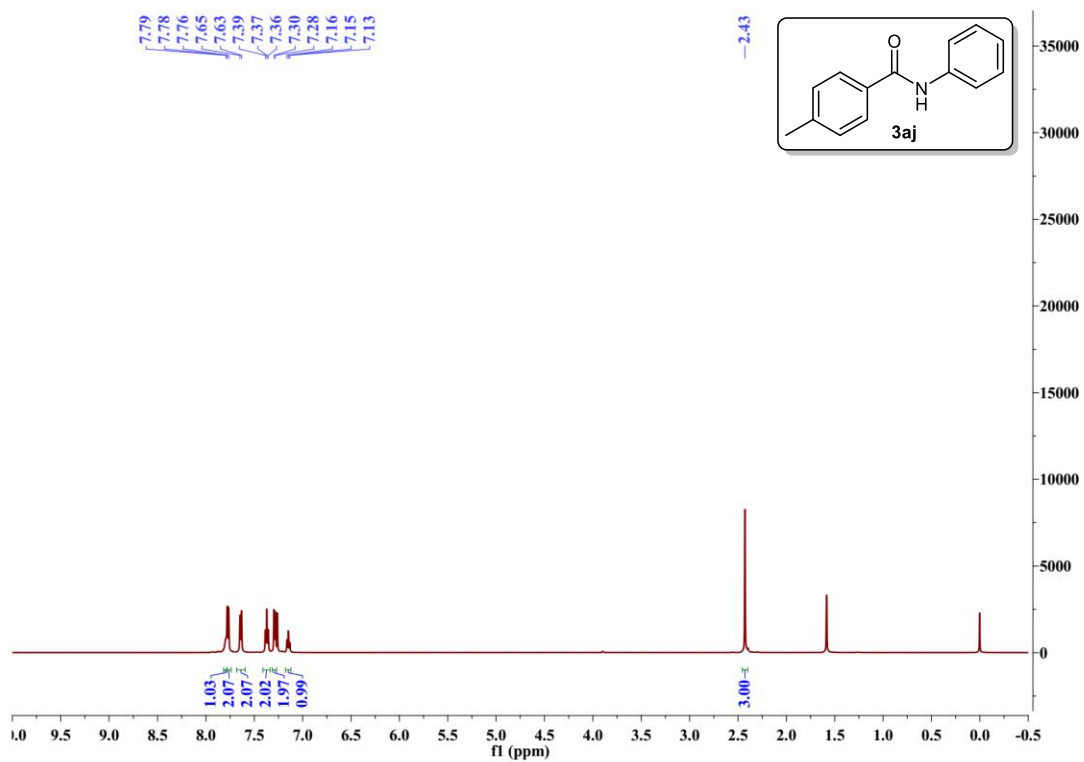

➤  $^{13}\text{C-NMR}$  spectrum for **3aj**

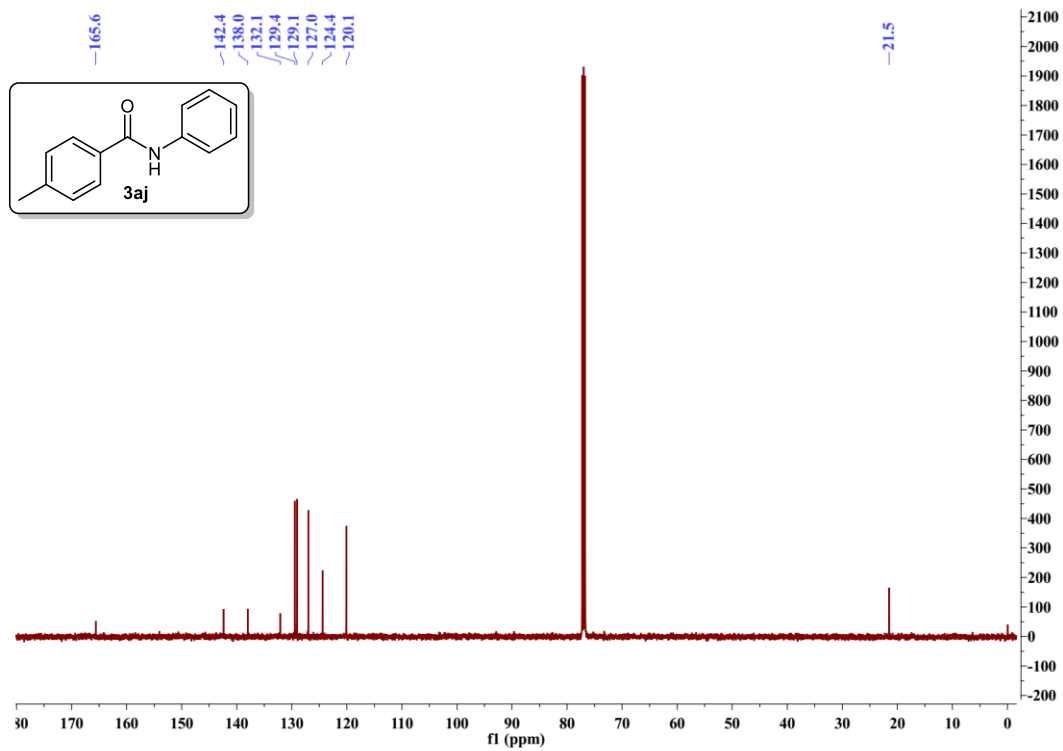

➤ HRMS spectrum for **3aj**

28#19 RT: 0.21 AV: 1 NL: 2.17E9  
T: FTMS + c APCI corona Full ms [60.0000-900.0000]

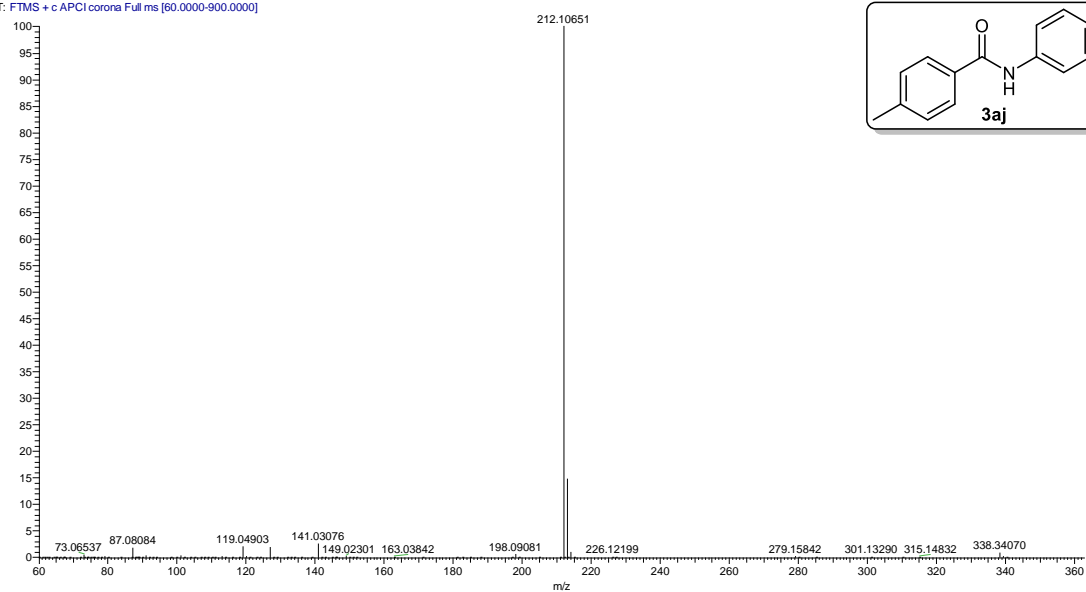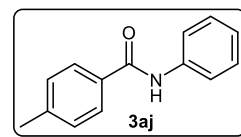

➤ <sup>1</sup>H-NMR spectrum for **3ak**

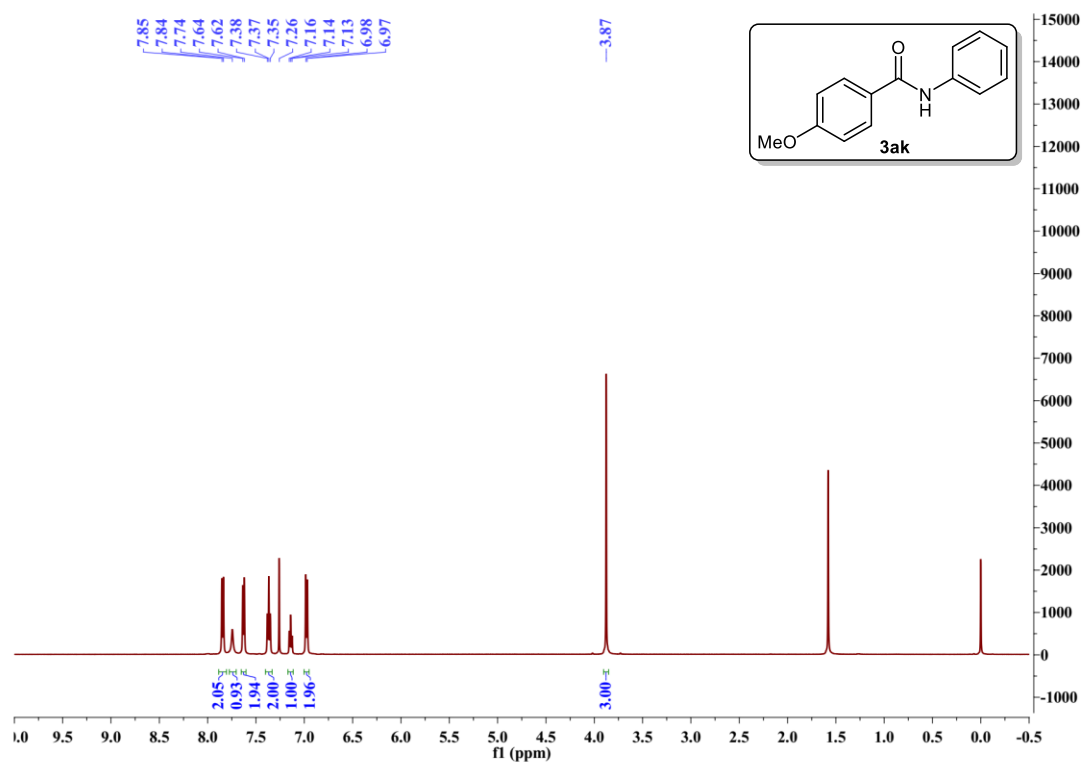

➤ <sup>13</sup>C-NMR spectrum for **3ak**

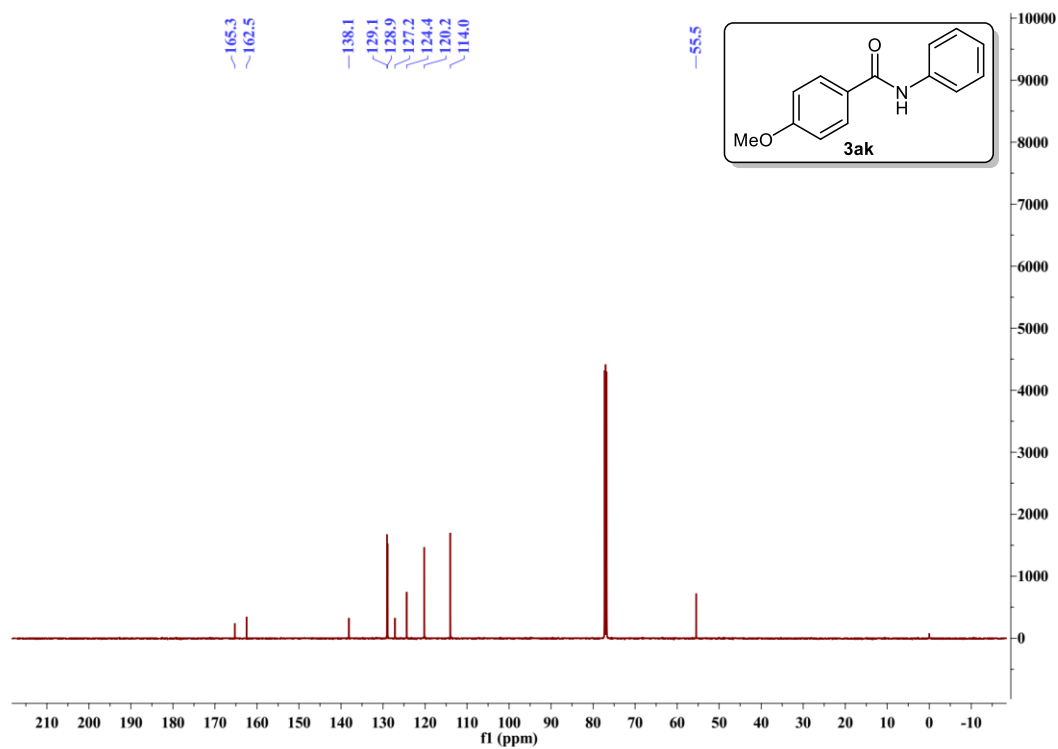

➤ HRMS spectrum for **3ak**

25 #19 RT: 0.21 AV: 1 NL: 1.07E9  
T: FTMS + c APCI corona Full ms [60.0000-900.0000]

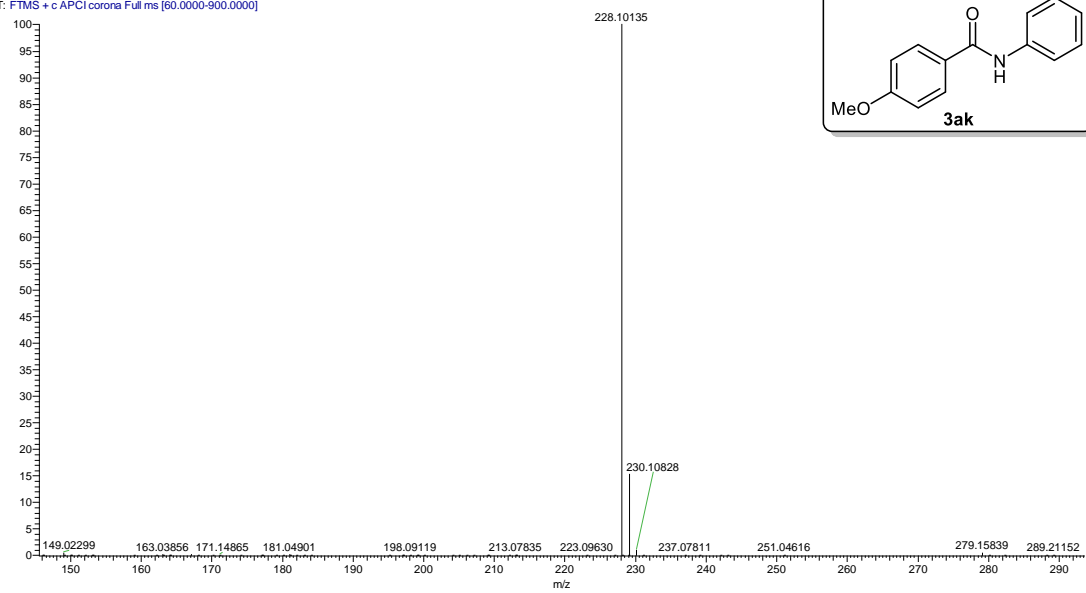

➤ <sup>1</sup>H-NMR spectrum for **3al**

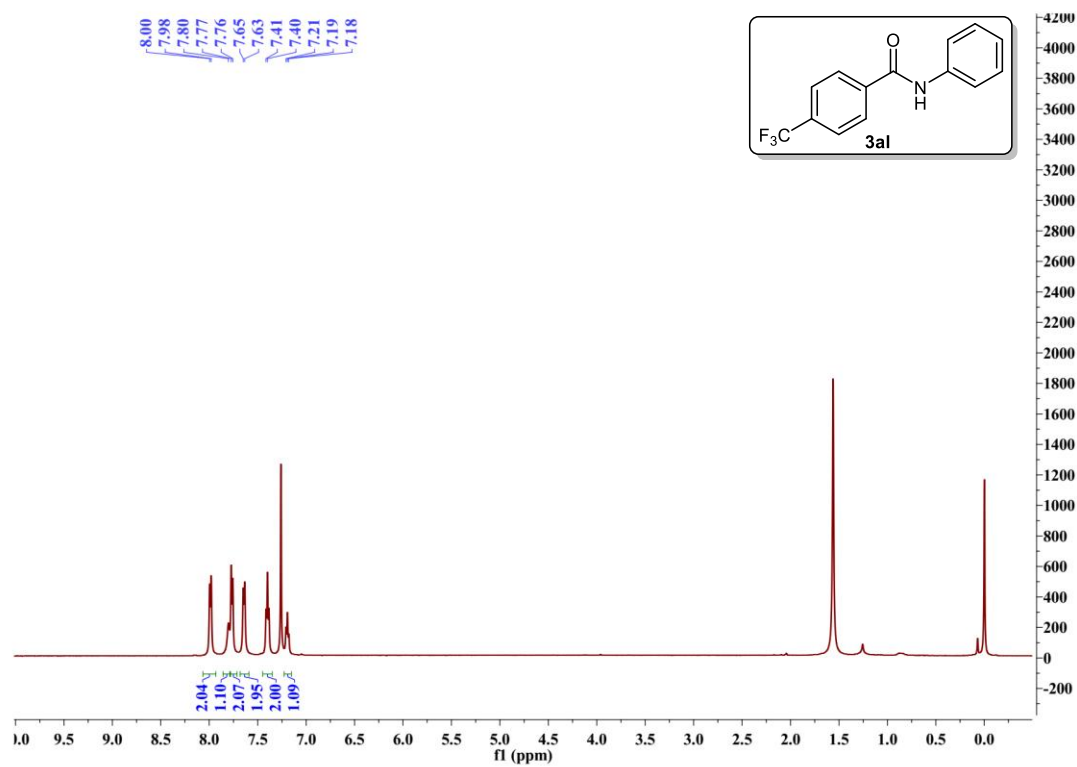

➤ <sup>13</sup>C-NMR spectrum for **3al**

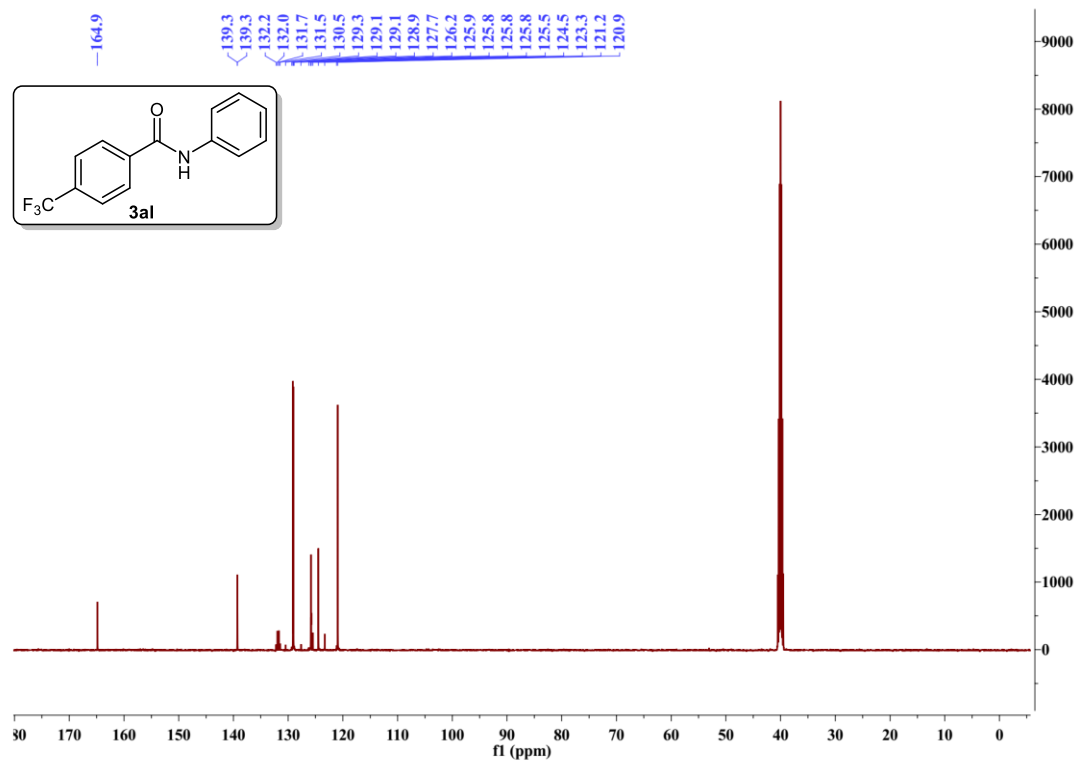



➤ HRMS spectrum for **3al**

29#19 RT: 0.21 AV: 1 NL: 1.21E9  
T: FTMS + c APCI corona Full ms [60.0000-900.0000]

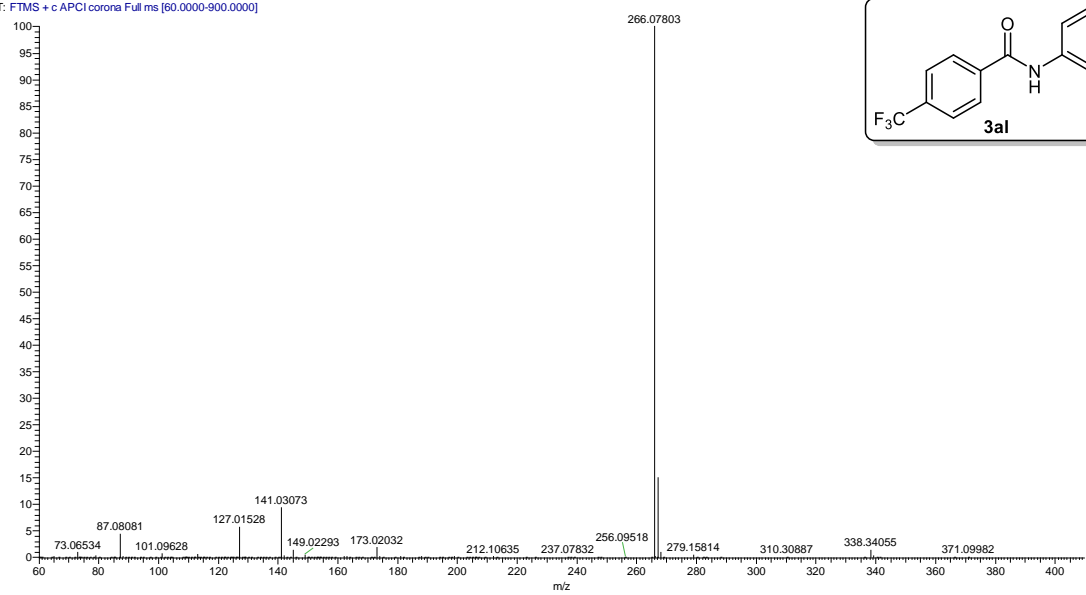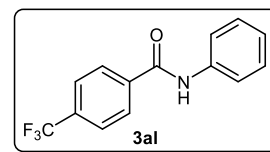

➤ <sup>1</sup>H-NMR spectrum for **3am**

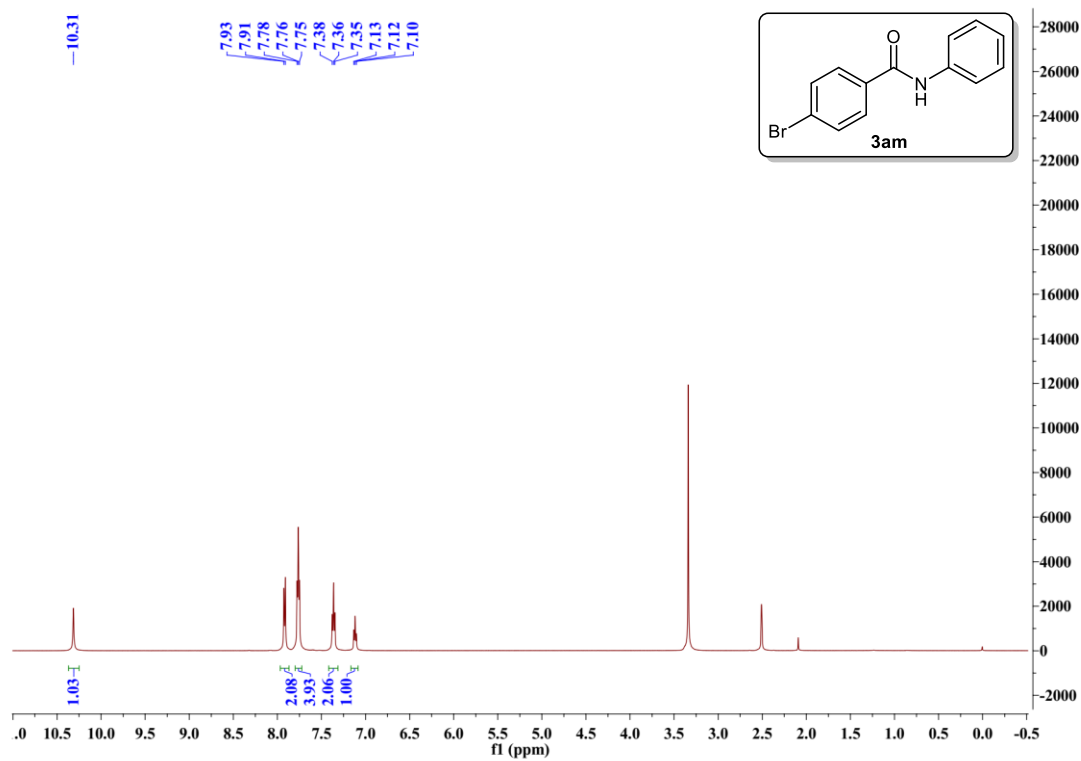

➤ <sup>13</sup>C-NMR spectrum for **3am**

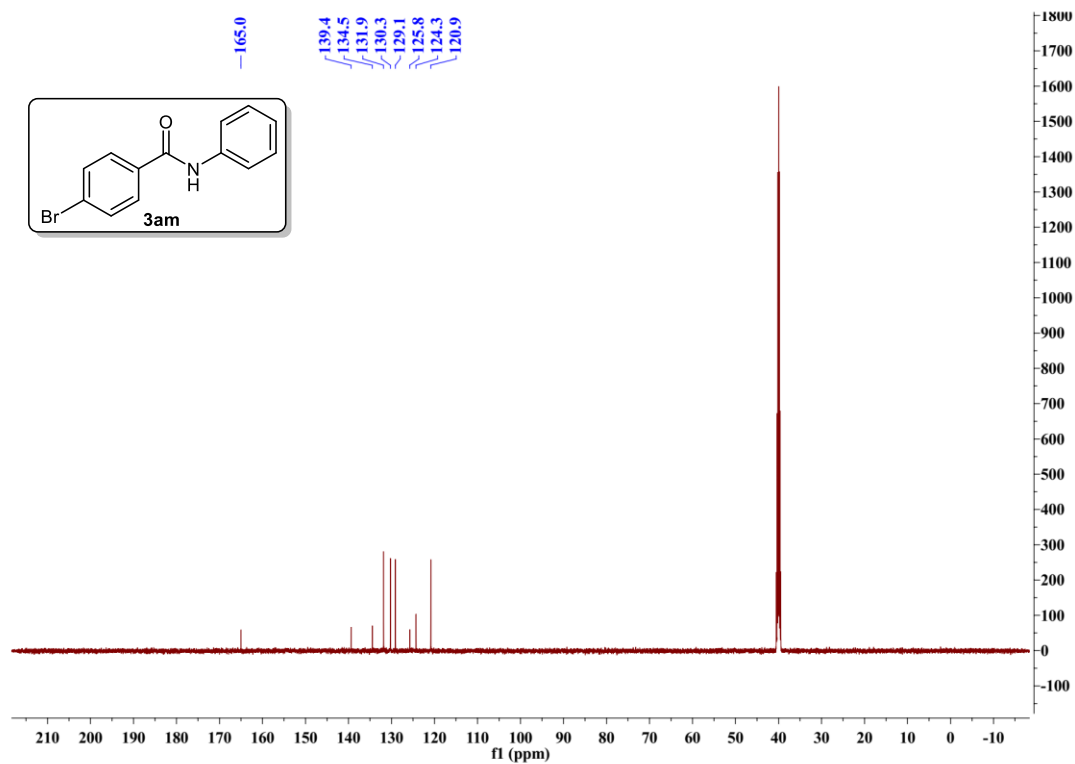

➤ HRMS spectrum for **3am**

36 #19 RT: 0.21 AV: 1 NL: 2.64E8  
T: FTMS + c APCI corona Full ms [60.0000-900.0000]

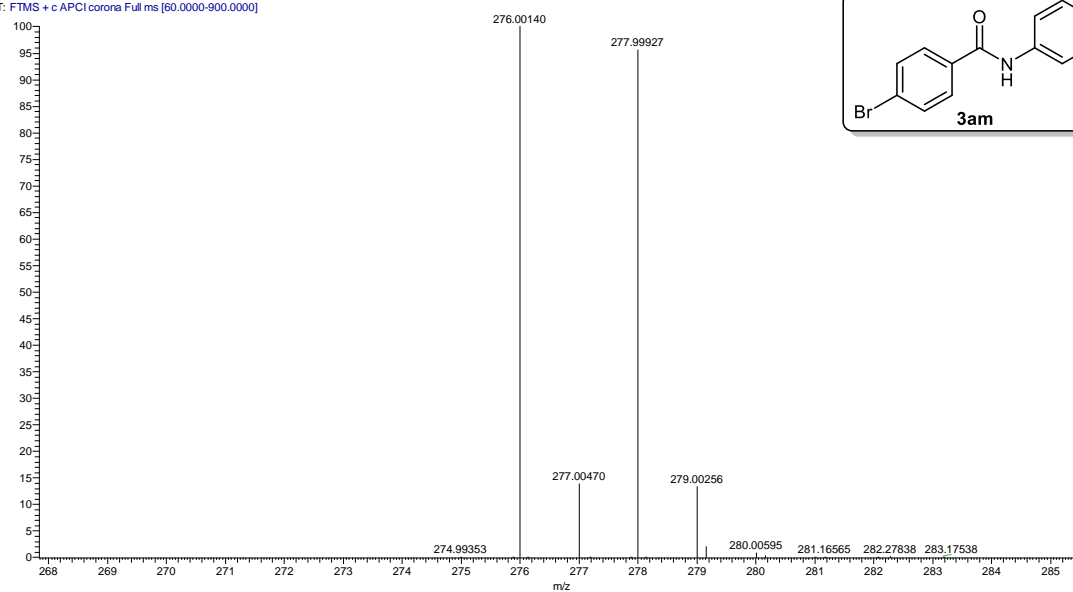

➤  $^1\text{H-NMR}$  spectrum for **3an**

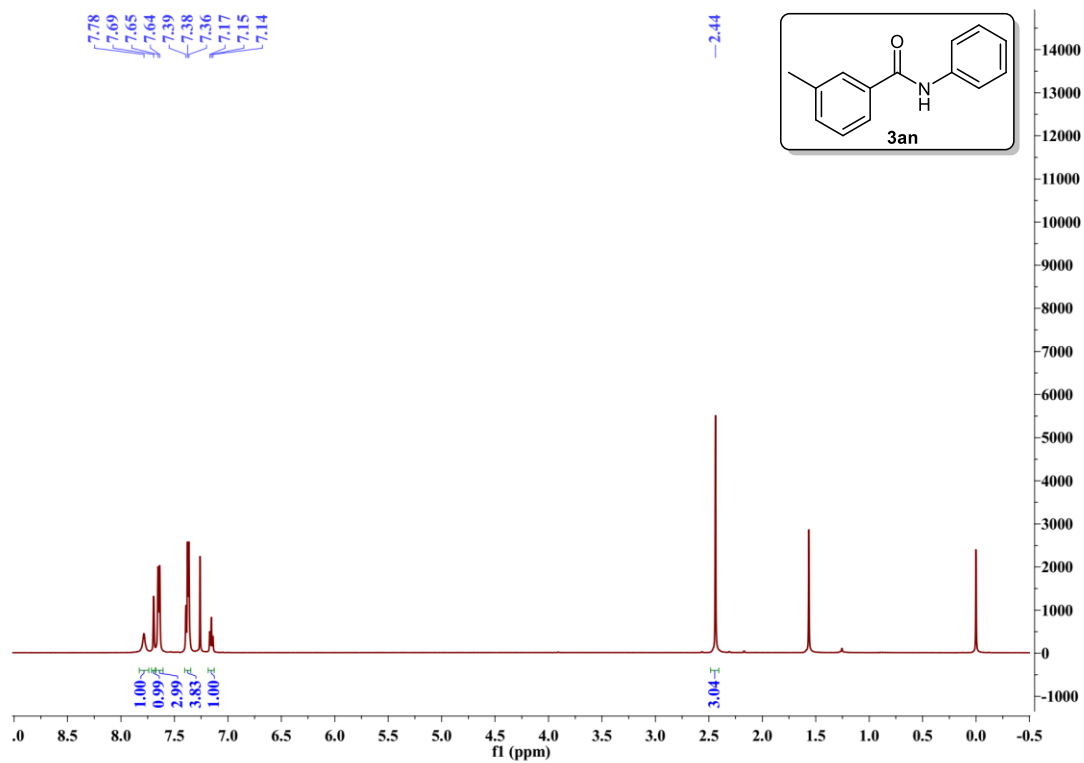

➤  $^{13}\text{C-NMR}$  spectrum for **3an**

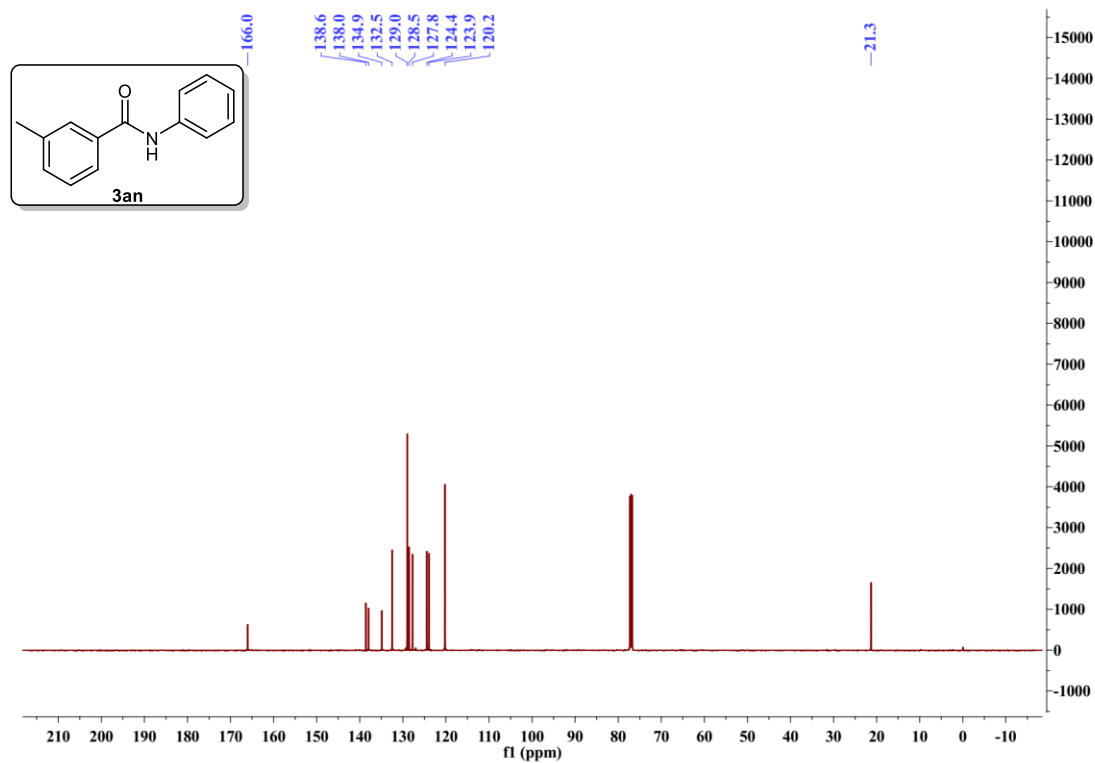

➤ HRMS spectrum for **3an**

34 #19 RT: 0.21 AV: 1 NL: 2.33E9  
T: FTMS + c APCI corona Full ms [60.0000-900.0000]

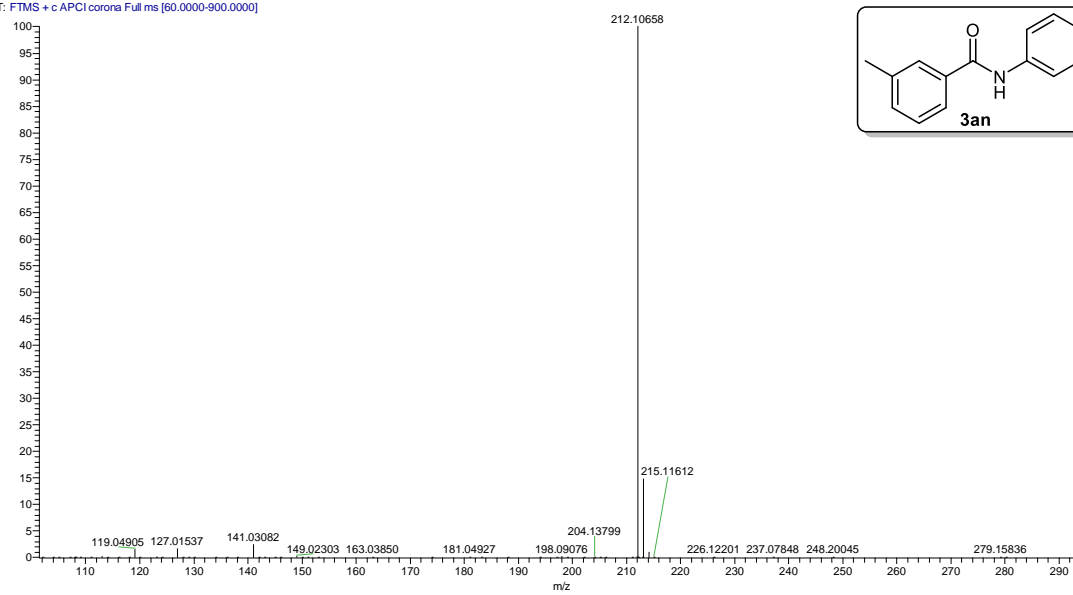

➤ <sup>1</sup>H-NMR spectrum for **3ao**

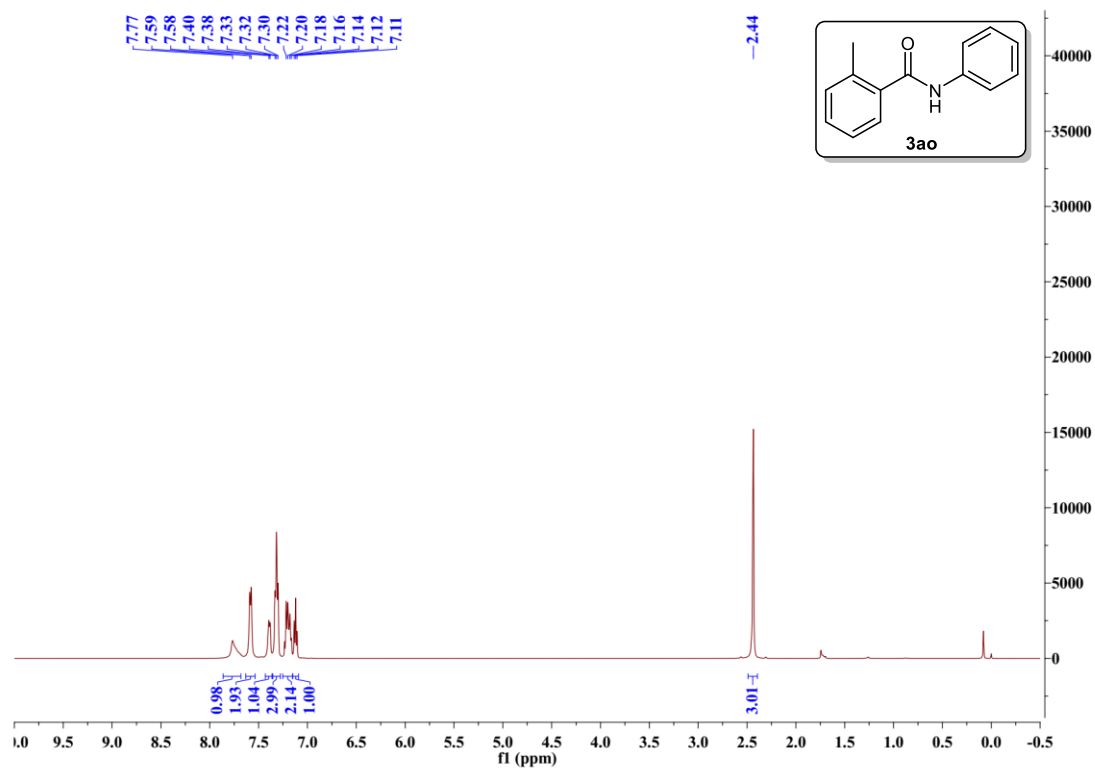

➤ <sup>13</sup>C-NMR spectrum for **3ao**

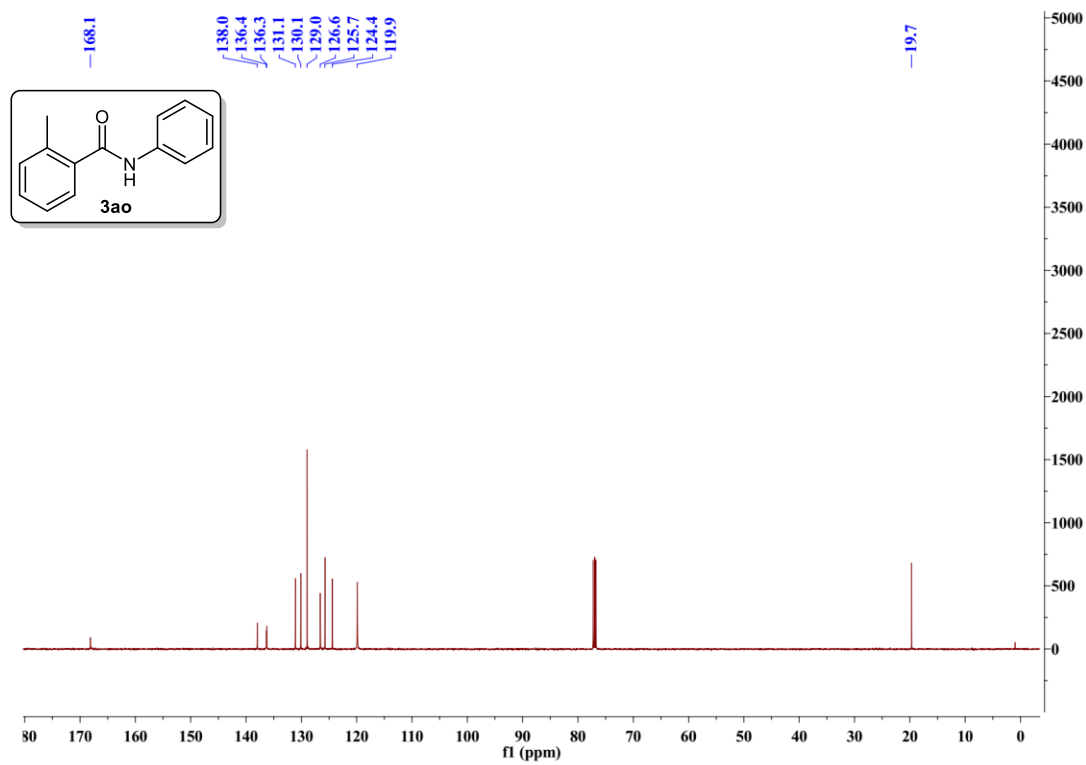

➤ HRMS spectrum for **3ao**

30 #21 RT: 0.24 AV: 1 SB: 11 0.63-0.75 NL: 5.90E8  
T: FTMS + c APCI corona Full ms [60.0000-900.0000]

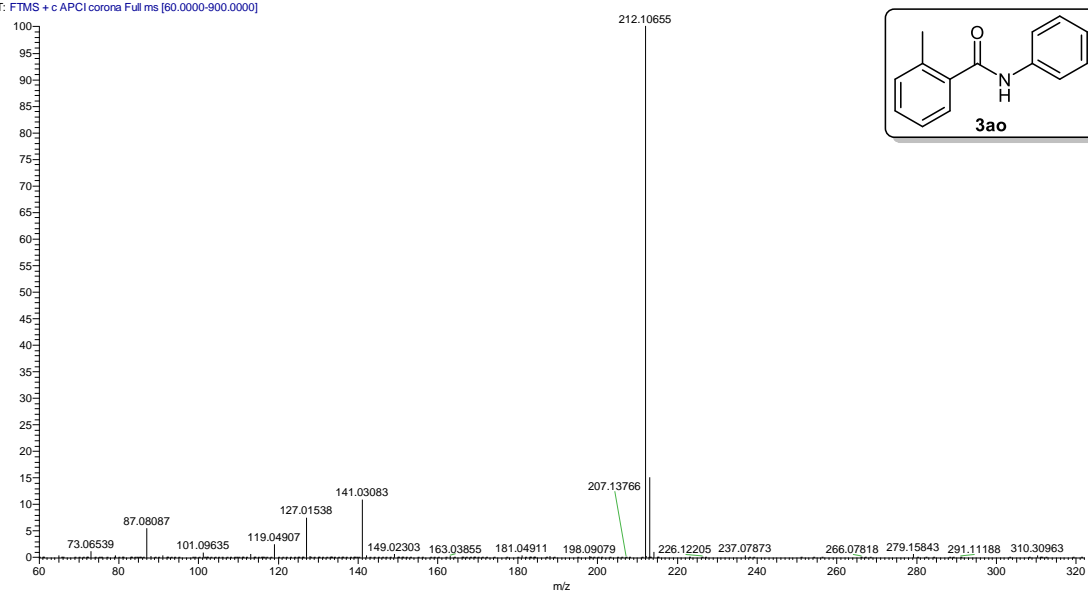

➤  $^1\text{H-NMR}$  spectrum for **3ap**

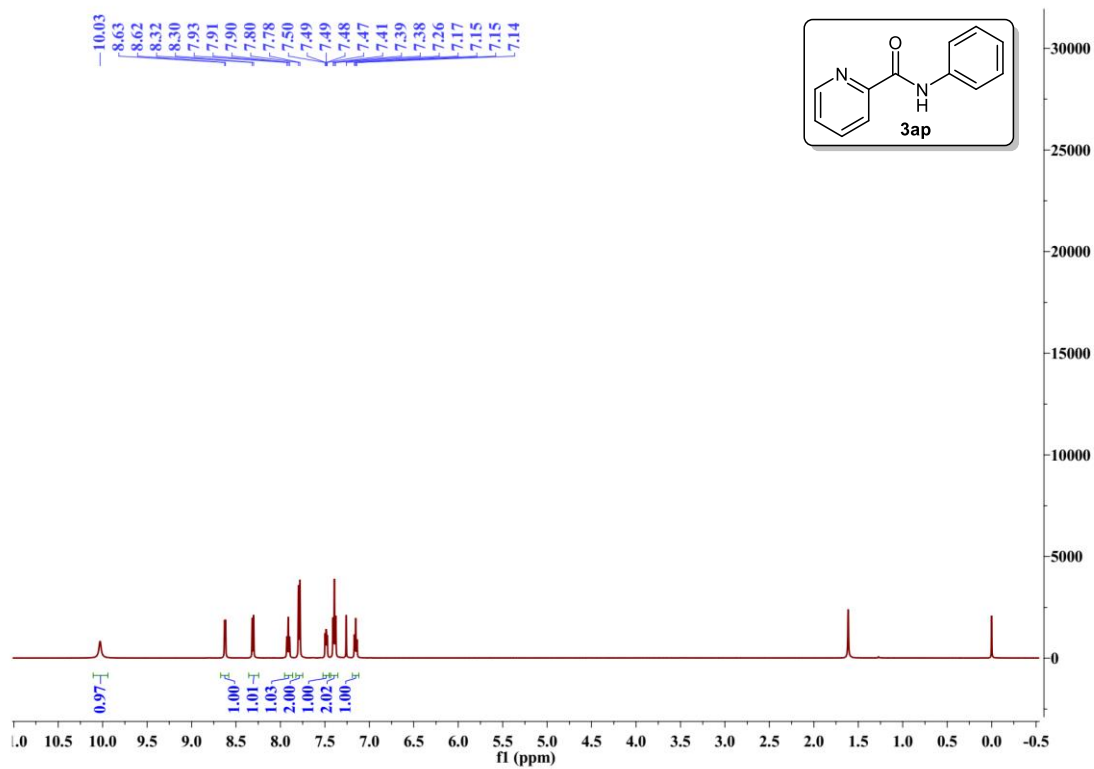

➤  $^{13}\text{C-NMR}$  spectrum for **3ap**

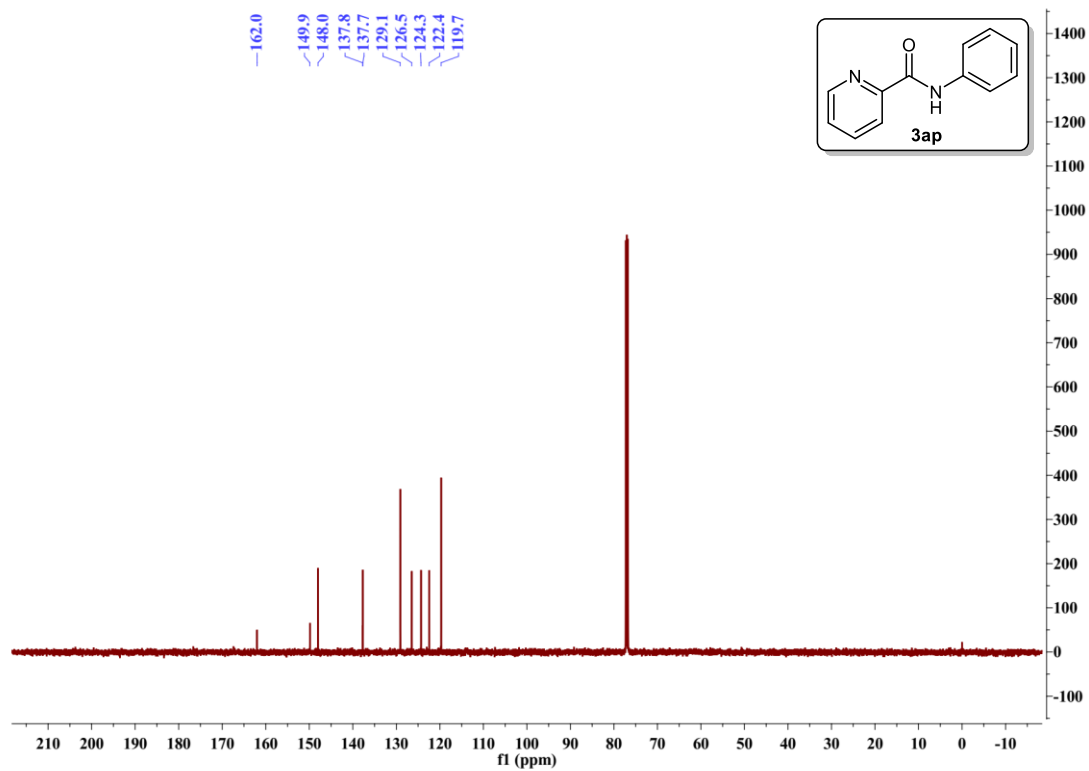



➤ HRMS spectrum for **3ap**

27#19 RT: 0.21 AV: 1 NL: 1.86E9  
T: FTMS + c APCI corona Full ms [60.0000-900.0000]

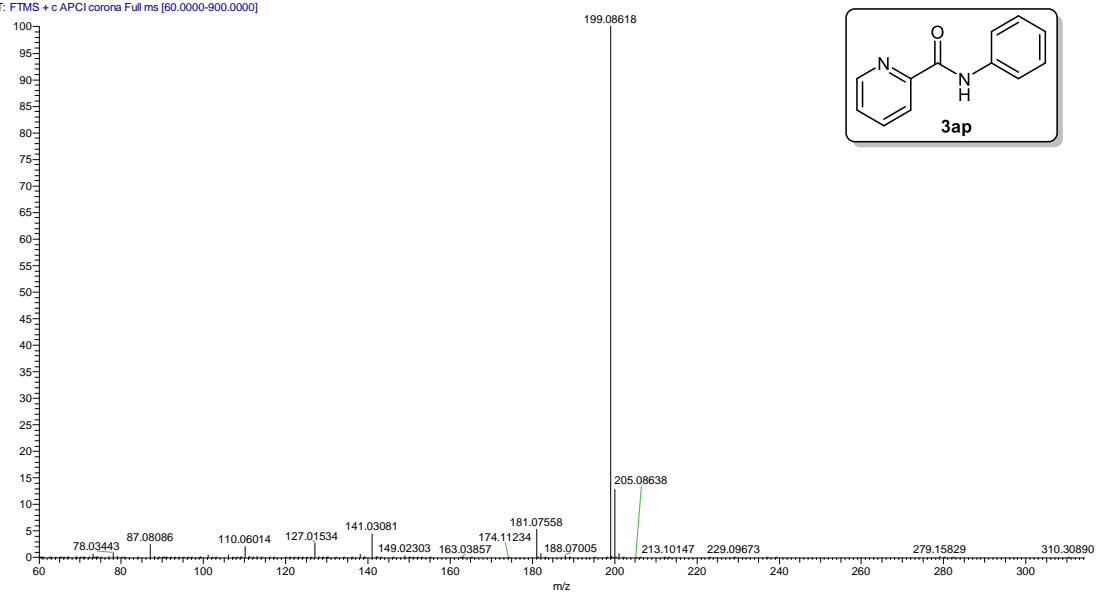

➤ <sup>1</sup>H-NMR spectrum for **3aq**

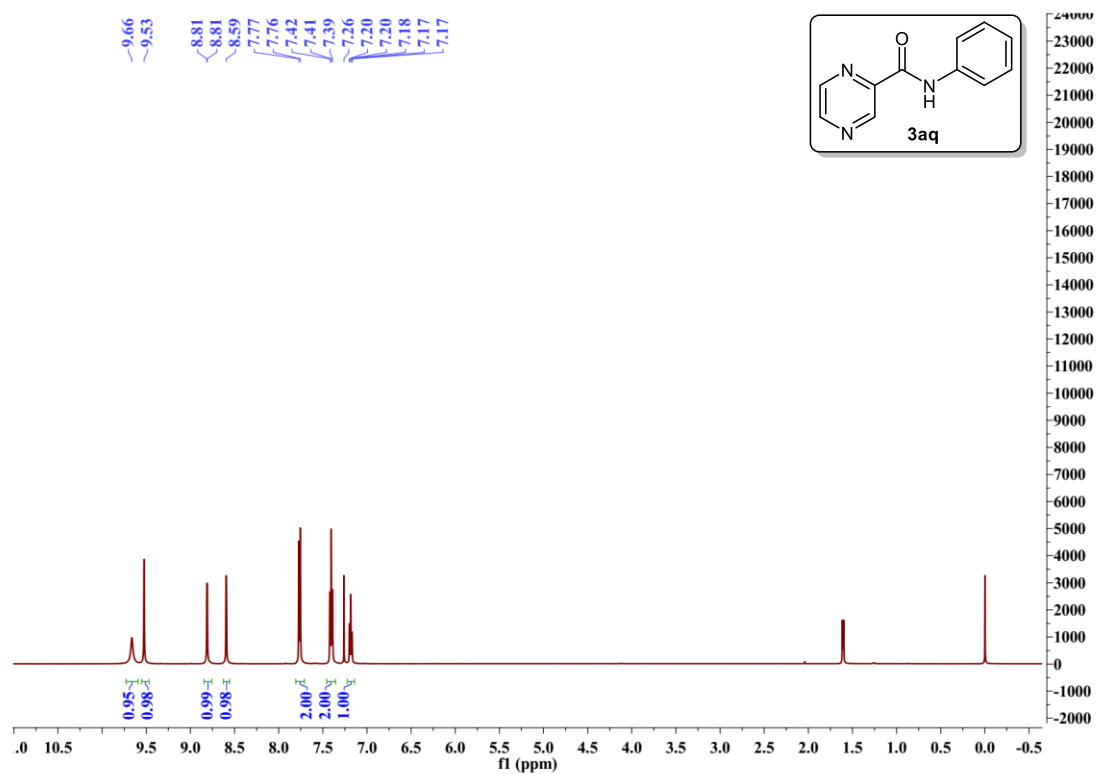

➤ <sup>13</sup>C-NMR spectrum for **3aq**

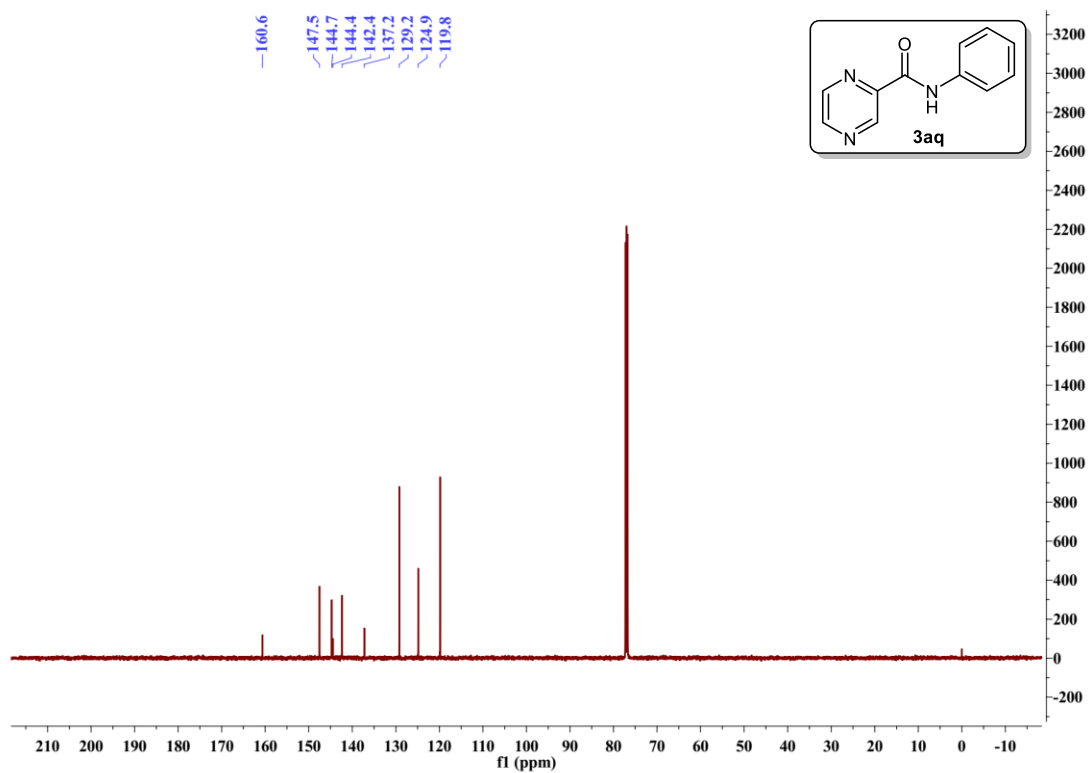

➤ HRMS spectrum for **3aq**

31 #19 RT: 0.21 AV: 1 NL: 7.17E7  
T: FTMS + c APCI corona Full ms [100.0000-1500.0000]

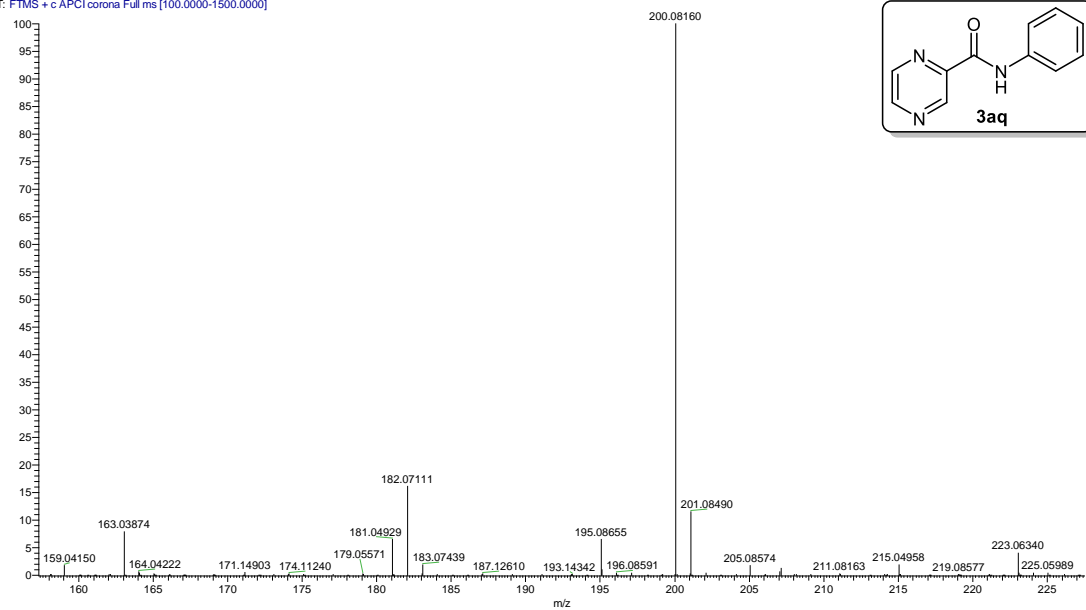

➤  $^1\text{H-NMR}$  spectrum for **3ar**

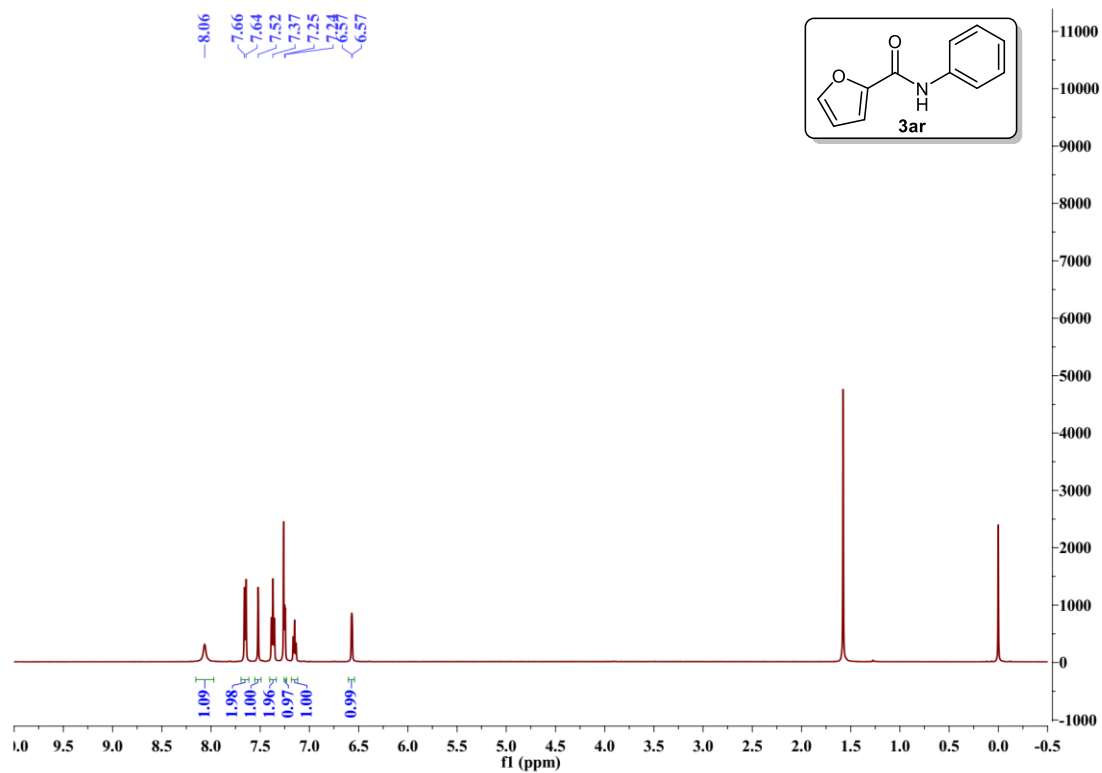

➤  $^{13}\text{C-NMR}$  spectrum for **3ar**

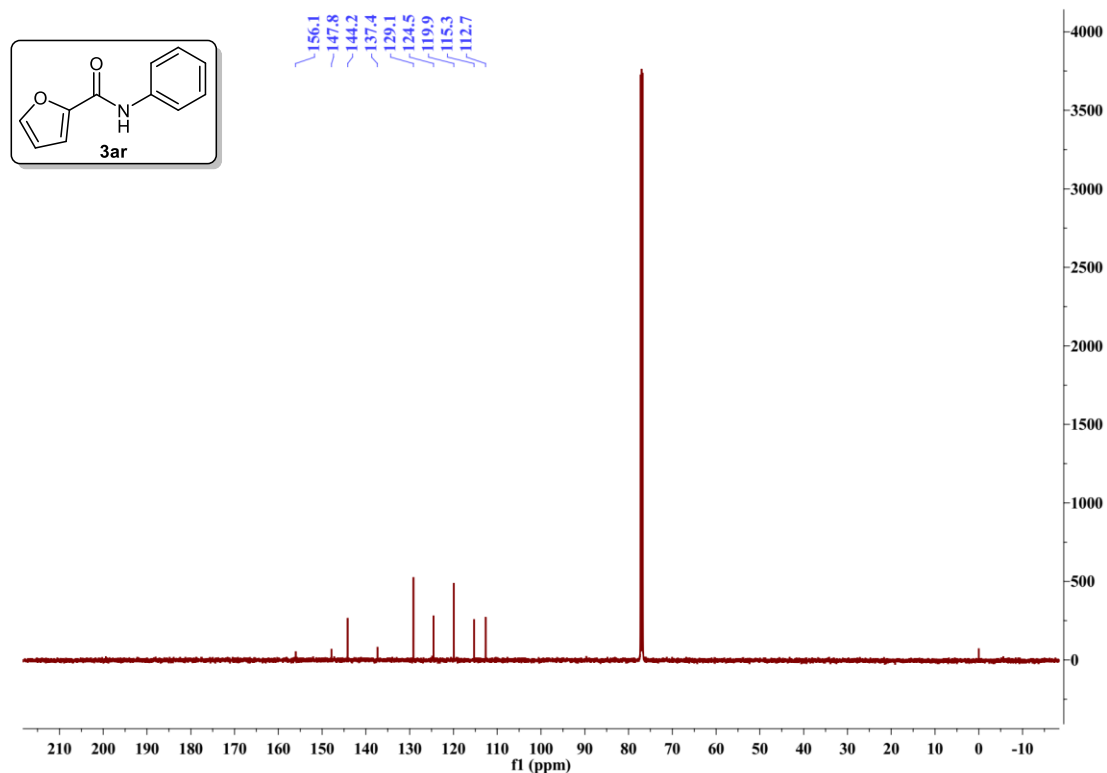

➤ HRMS spectrum for **3ar**

26 #19 RT: 0.21 AV: 1 NL: 2.52E9  
T: FTMS + c APCI corona Full ms [60.0000-900.0000]

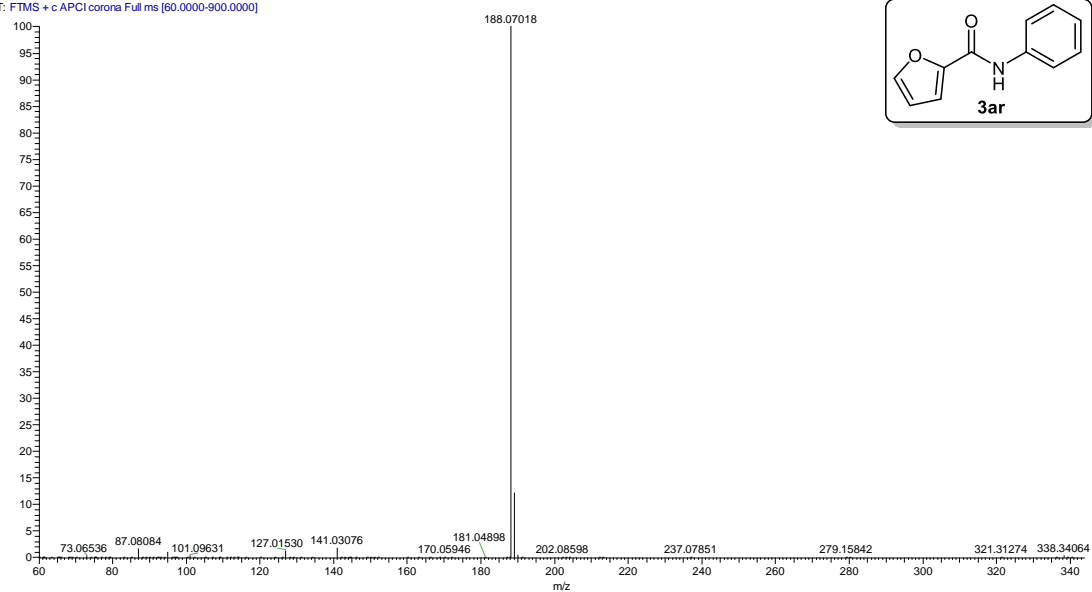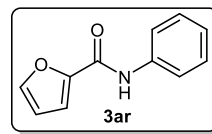

➤ <sup>1</sup>H-NMR spectrum for **3as**

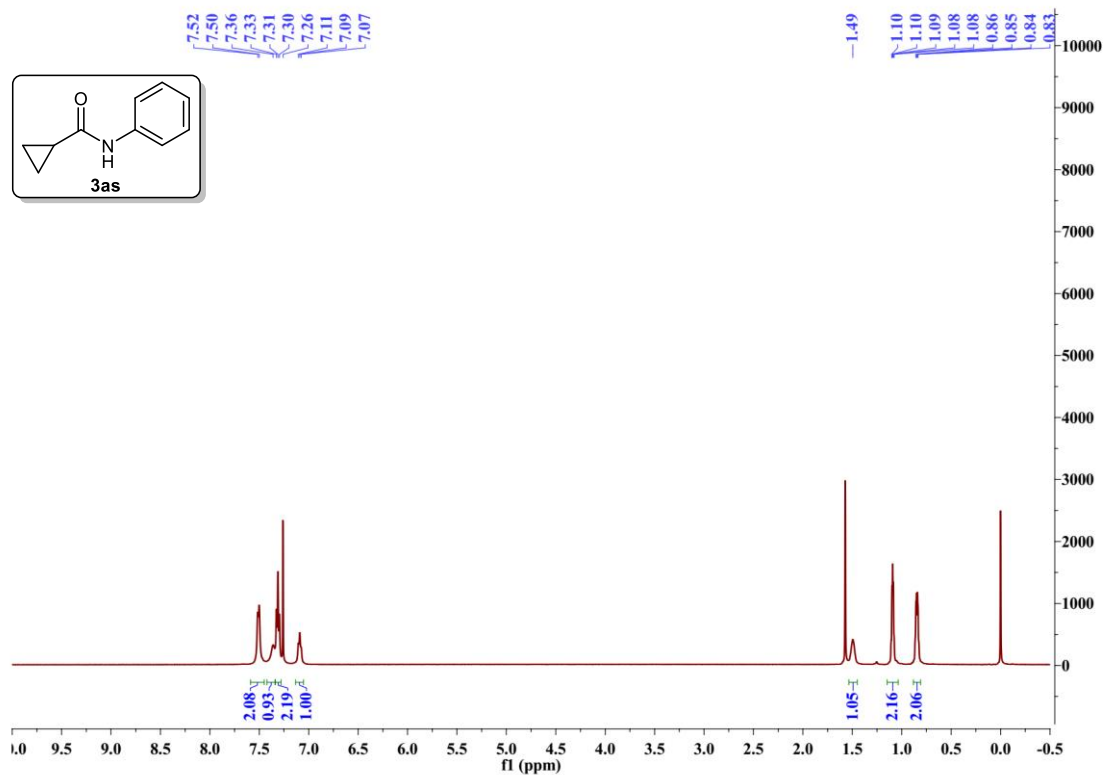

➤ <sup>13</sup>C-NMR spectrum for **3as**

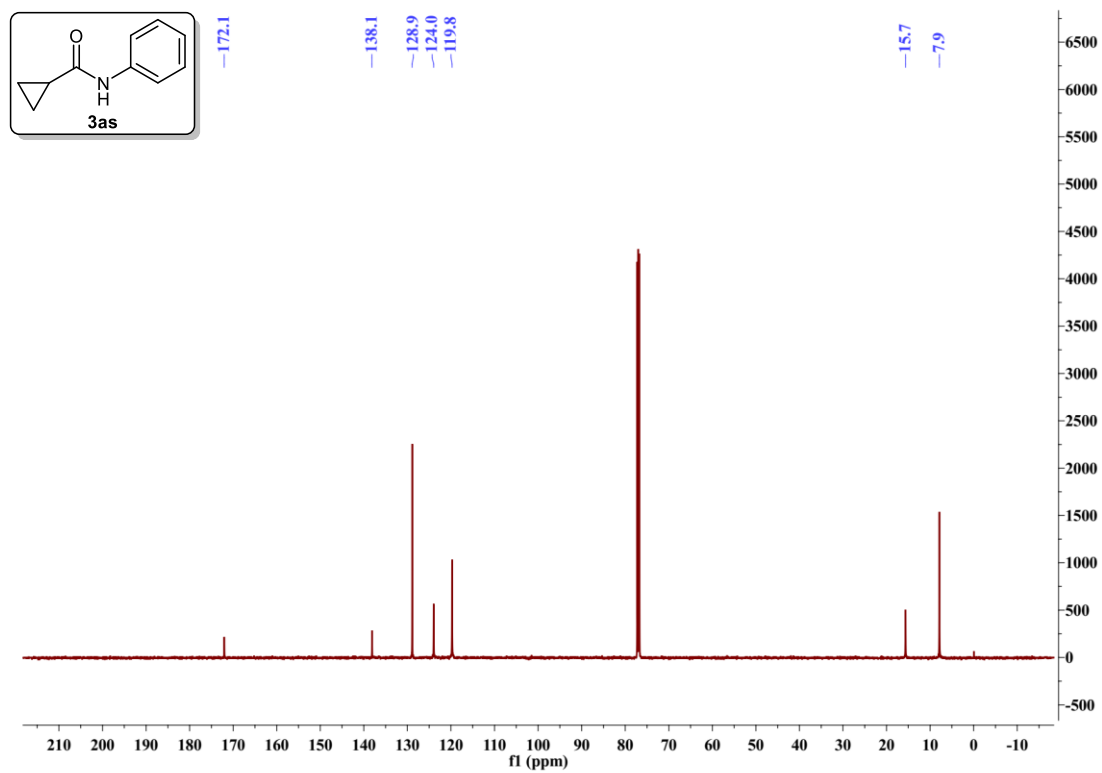

➤ HRMS spectrum for **3as**

31 #21 RT: 0.24 AV: 1 NL: 8.67E6  
T: FTMS + c APCI corona Full ms [60.0000-900.0000]

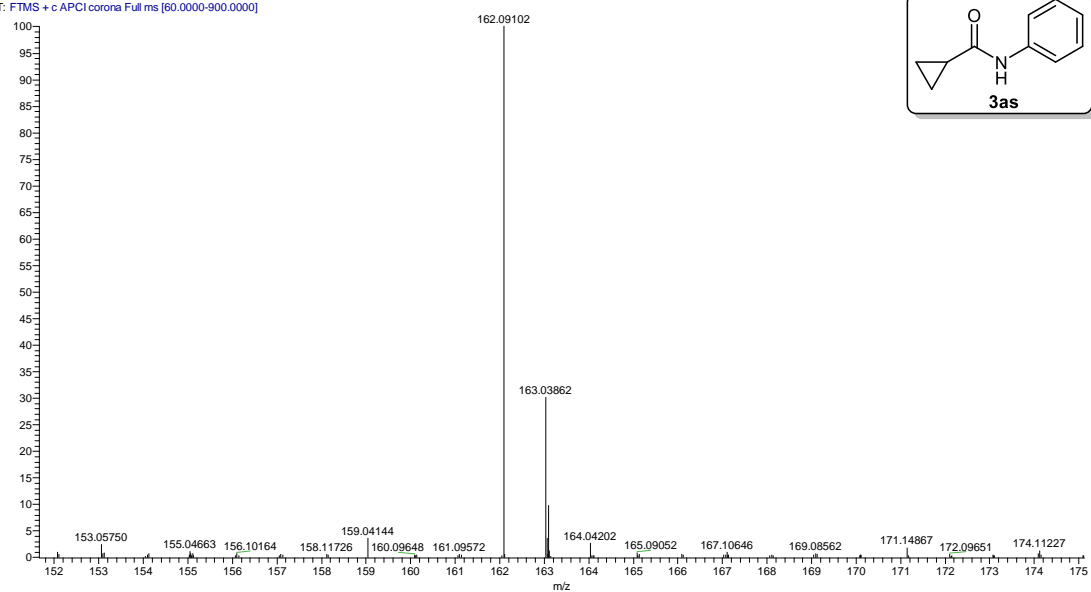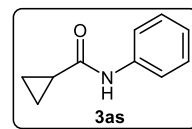

➤ <sup>1</sup>H-NMR spectrum for **3at**

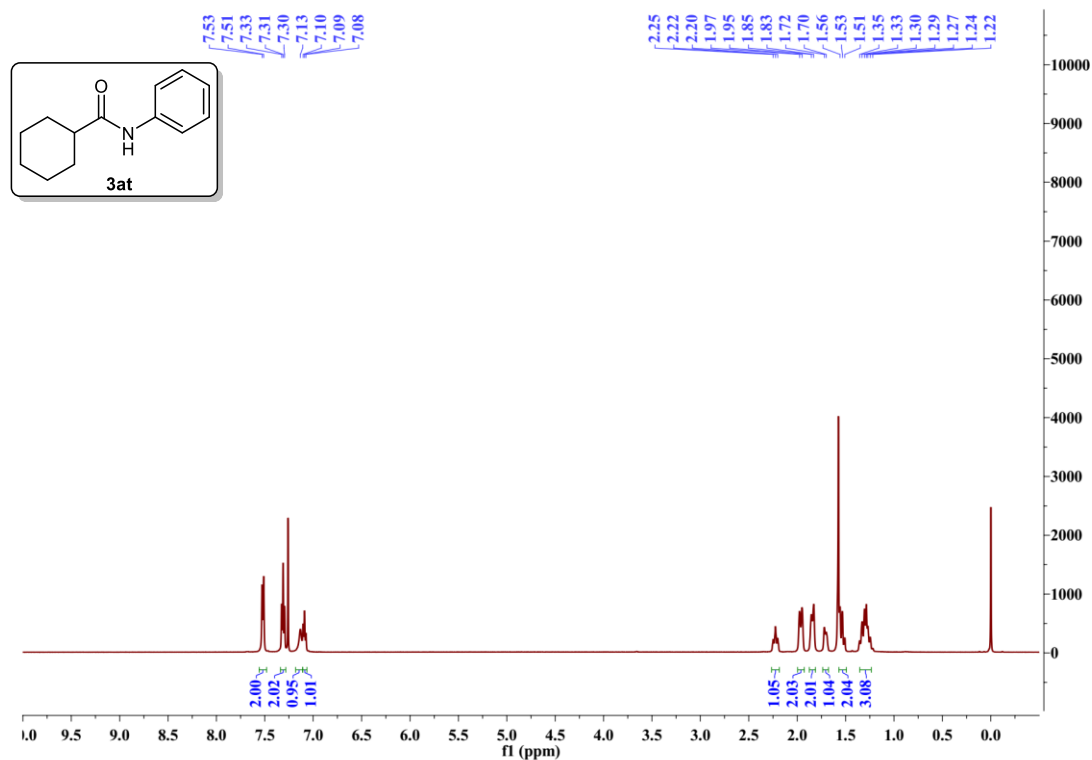

➤ <sup>13</sup>C-NMR spectrum for **3at**

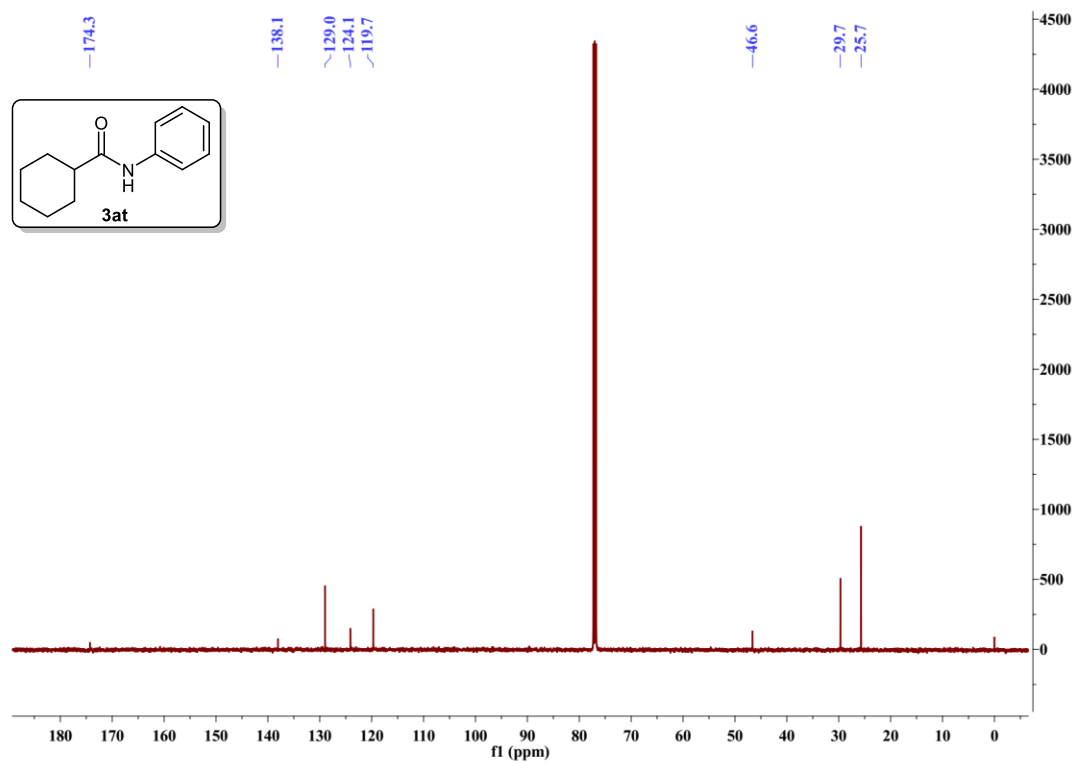



➤ HRMS spectrum for **3at**

32 #21 RT: 0.23 AV: 1 NL: 2.72E9  
T: FTMS + c APCI corona Full ms [60.0000-900.0000]

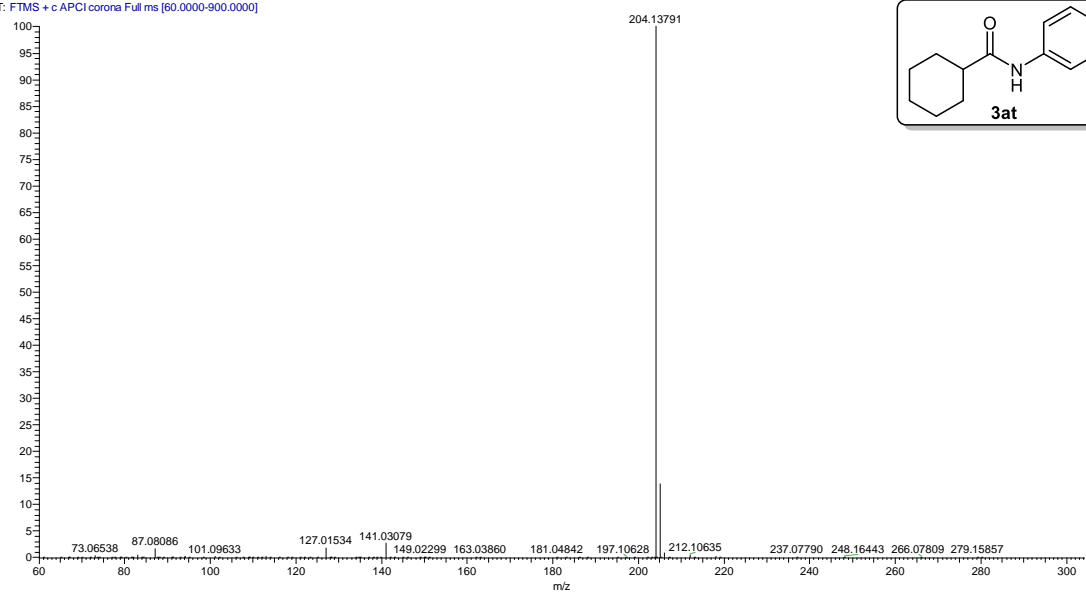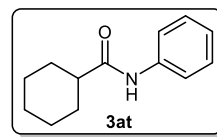

➤ <sup>1</sup>H-NMR spectrum for **3au**

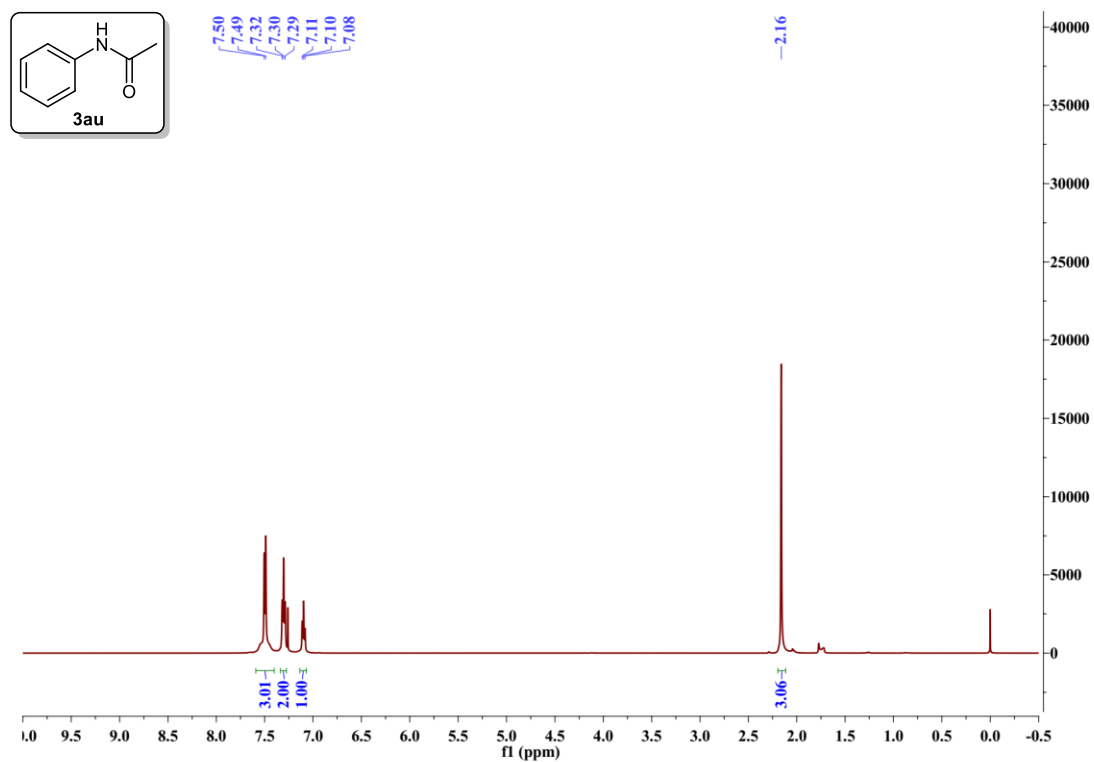

➤ <sup>13</sup>C-NMR spectrum for **3au**

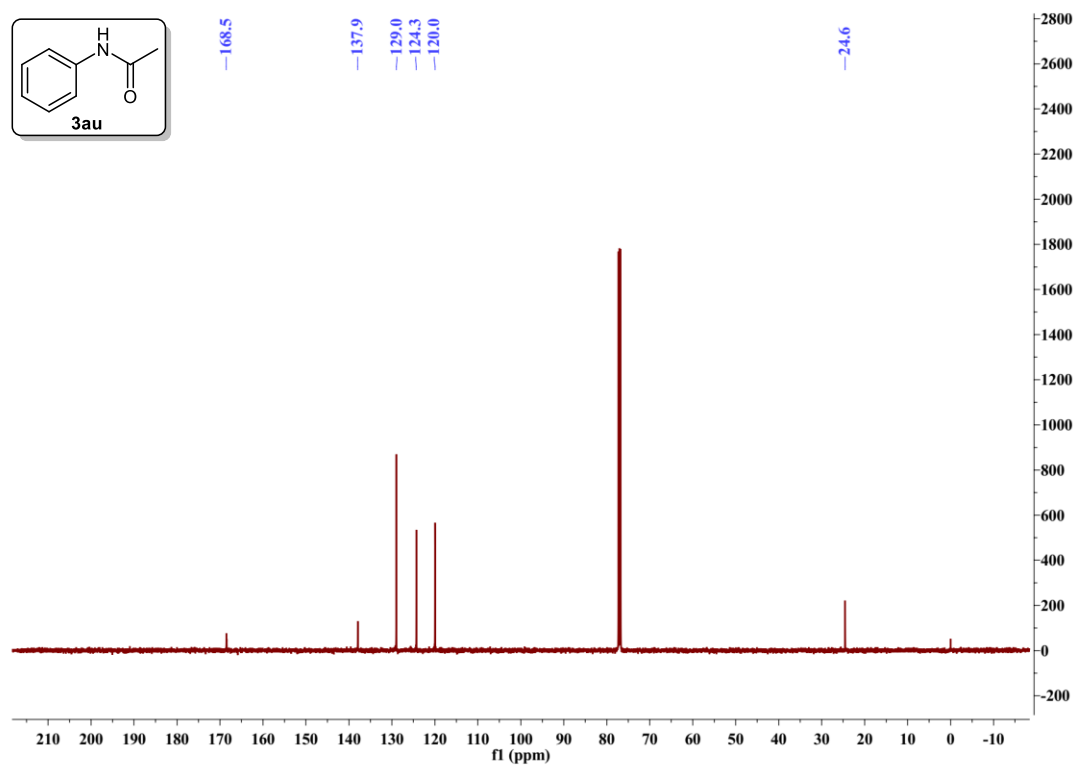

➤ HRMS spectrum for **3au**

30 #19 RT: 0.21 AV: 1 NL: 8.41E9  
T: FTMS + c APCI corona Full ms [100.0000-1500.0000]

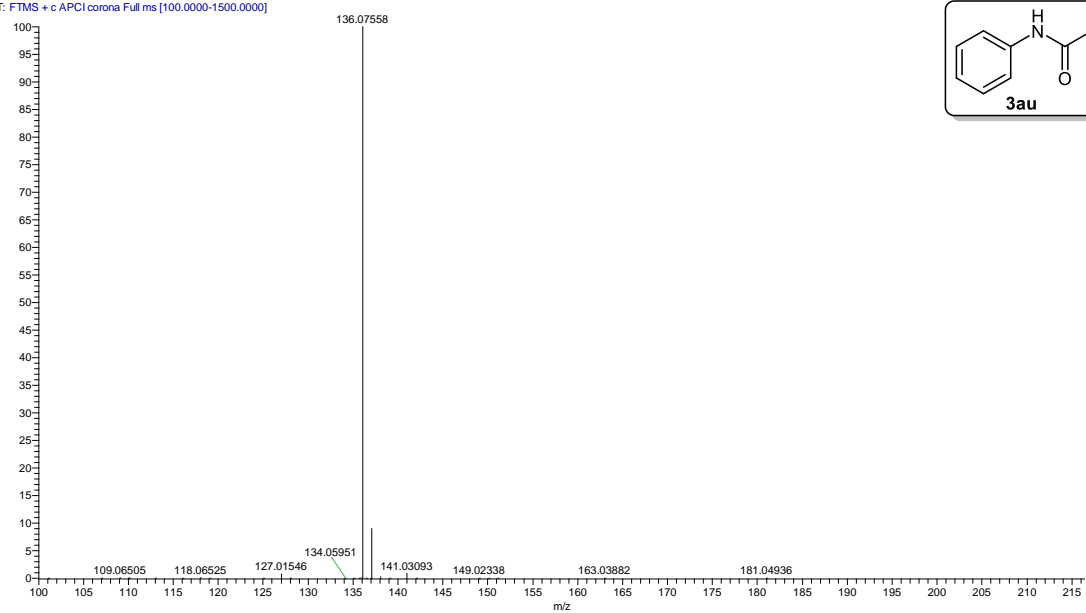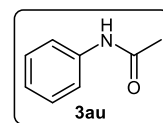

➤ <sup>1</sup>H-NMR spectrum for **3av**

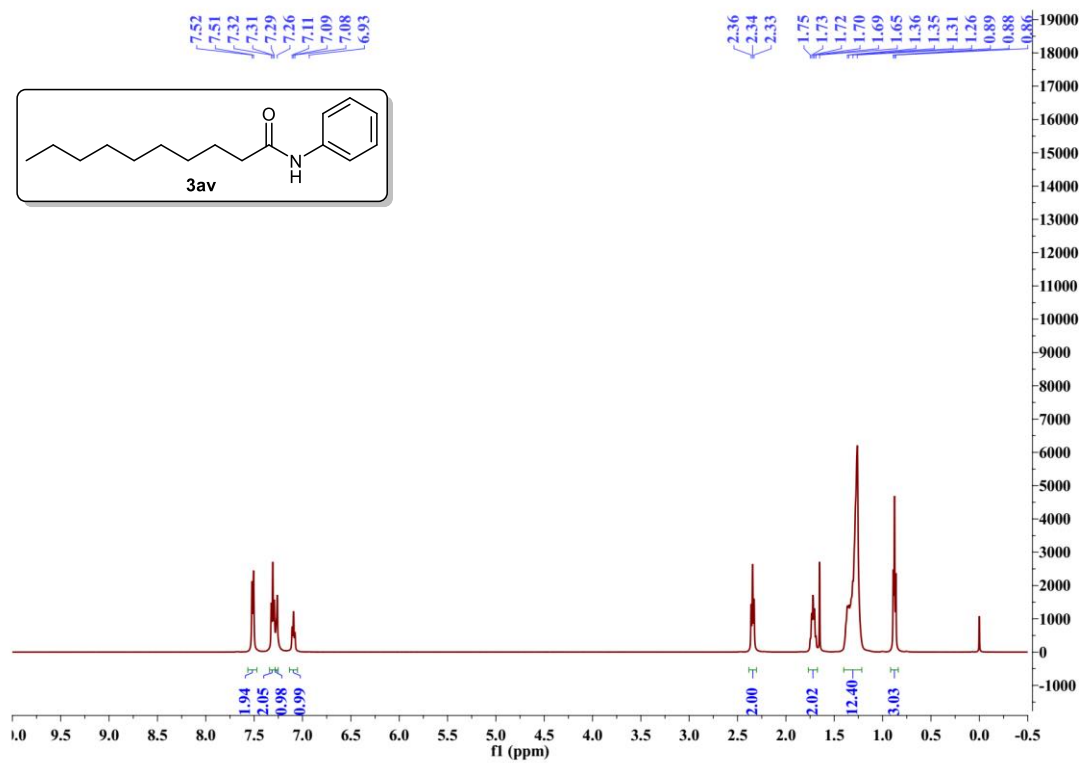

➤ <sup>13</sup>C-NMR spectrum for **3av**

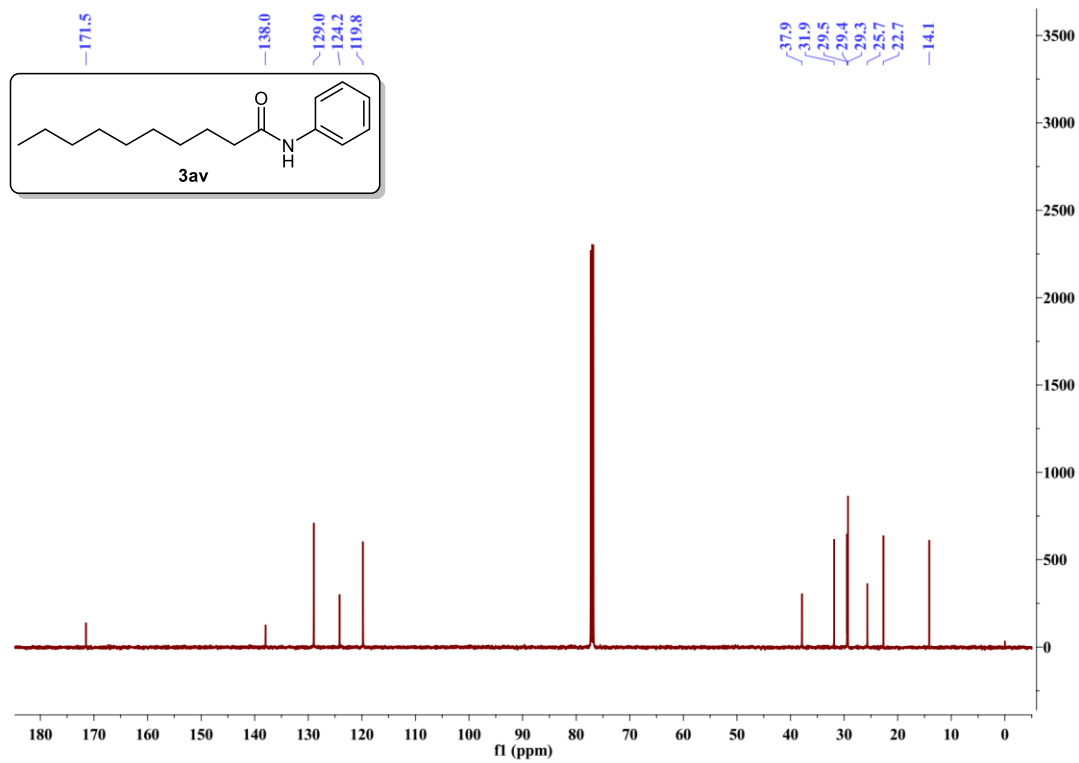

➤ HRMS spectrum for **3av**

33#19 RT: 0.22 AV: 1 SB: 10 0.73-0.84 NL: 6.46E8  
T: FTMS + c APCI/corona Full.ms [60.0000-900.0000]

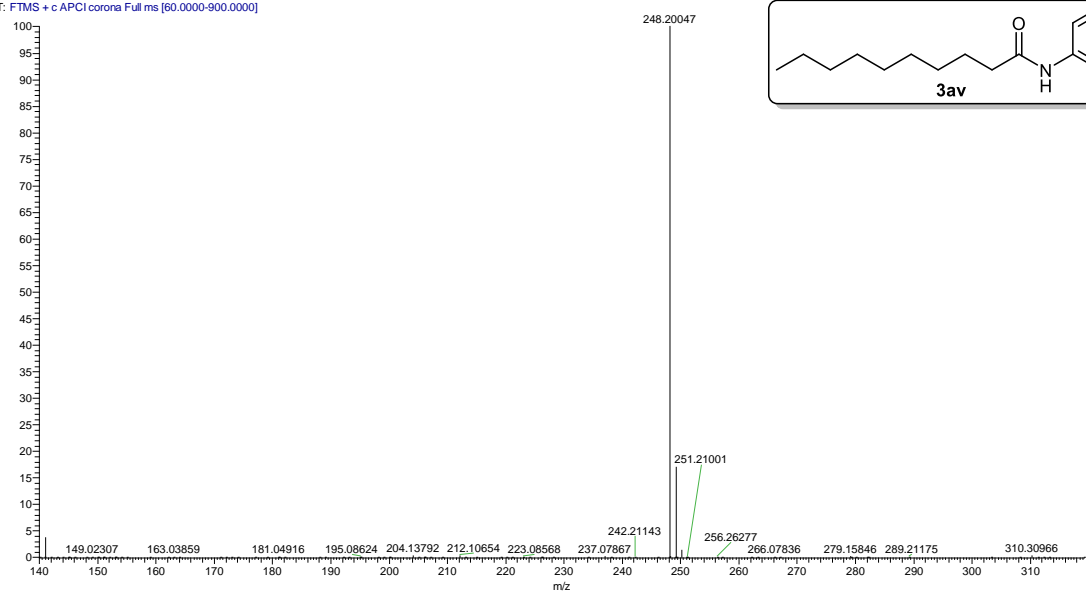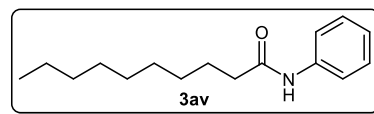

➤ <sup>1</sup>H-NMR spectrum for **3aw**

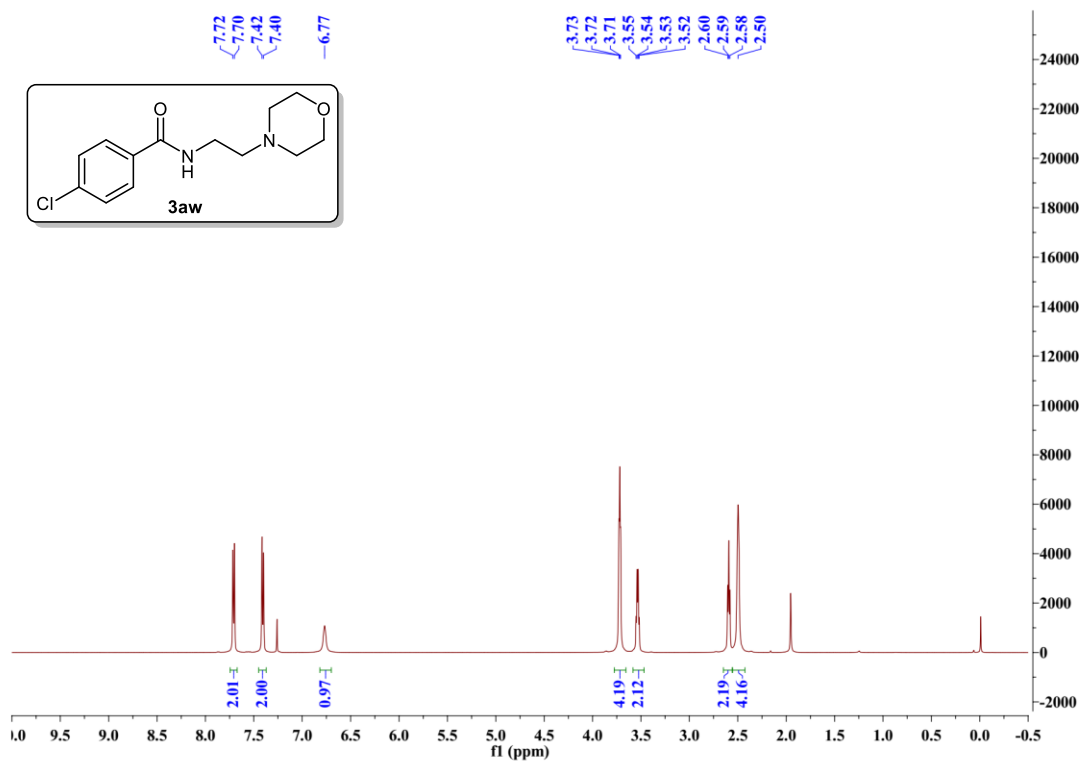

➤ <sup>13</sup>C-NMR spectrum for **3aw**

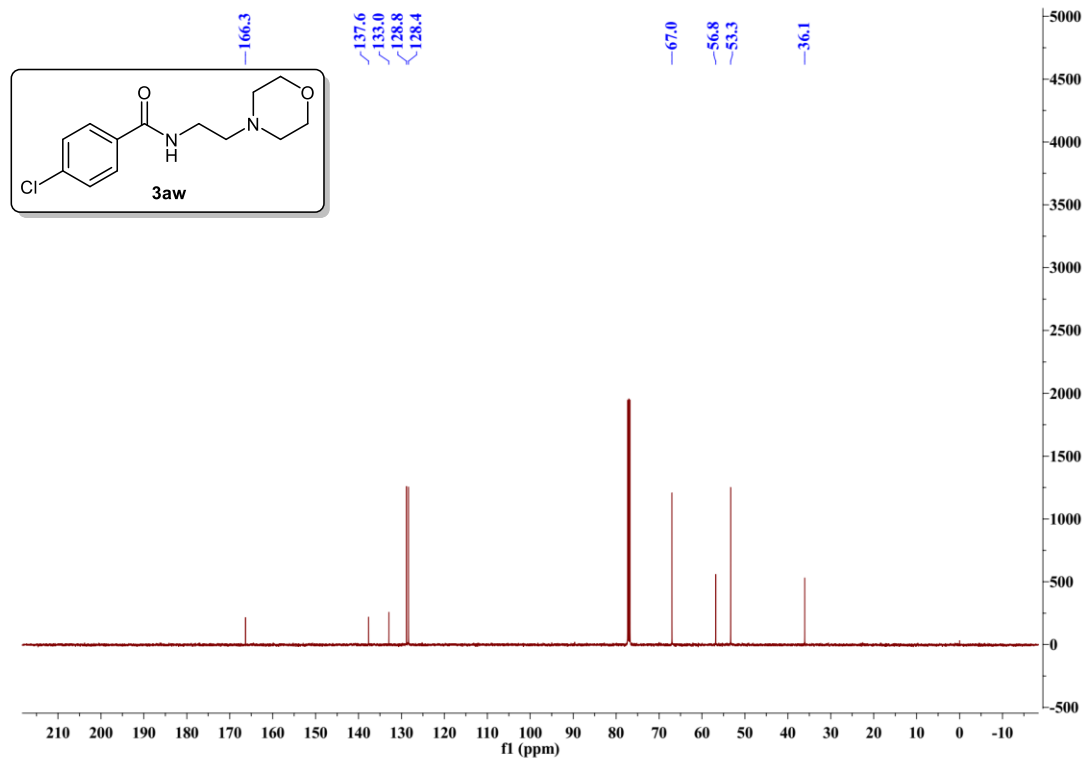

➤ HRMS spectrum for **3aw**

38#19 RT: 0.21 AV: 1 NL: 1.08E9  
T: FTMS + c APCI corona Full ms [60.0000-900.0000]

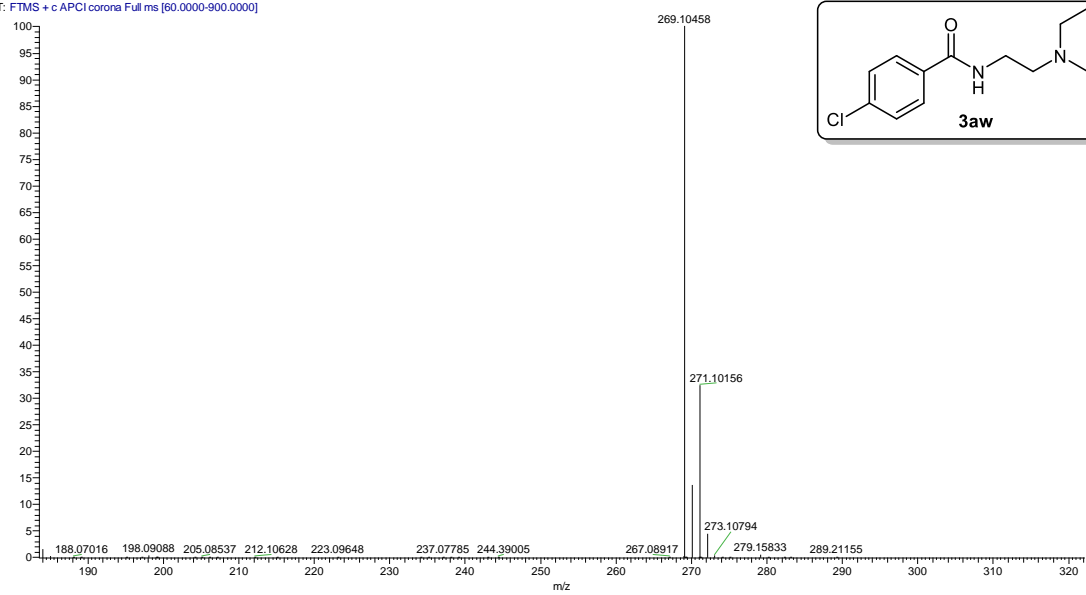

➤ <sup>1</sup>H-NMR spectrum for **3ax**

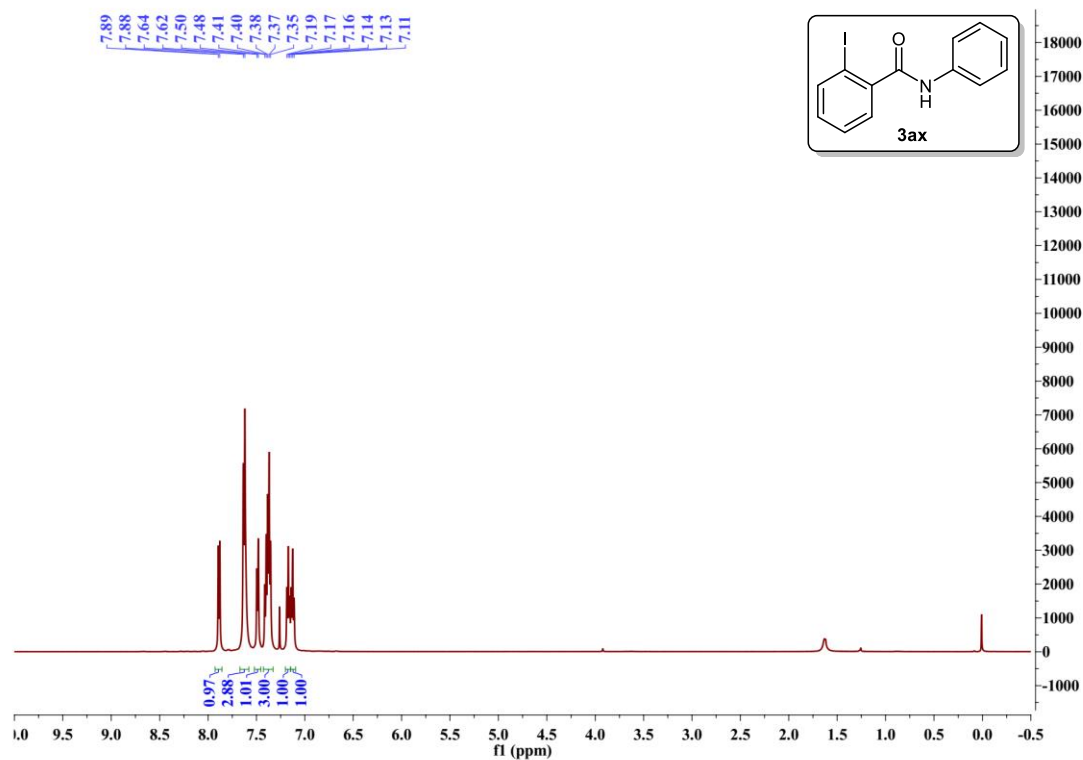

➤ <sup>13</sup>C-NMR spectrum for **3ax**

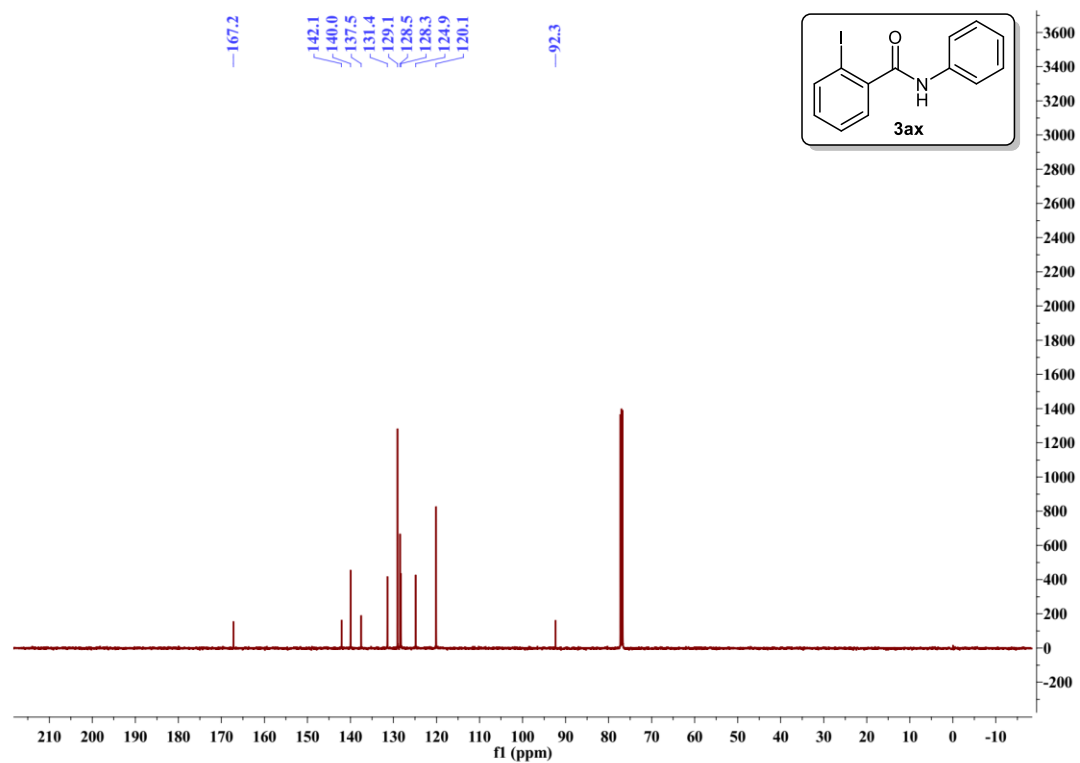



➤ HRMS spectrum for **3ax**

41 #19 RT: 0.21 AV: 1 NL: 1.19E9  
T: FTMS + c APCI corona Full ms [60.0000-900.0000]

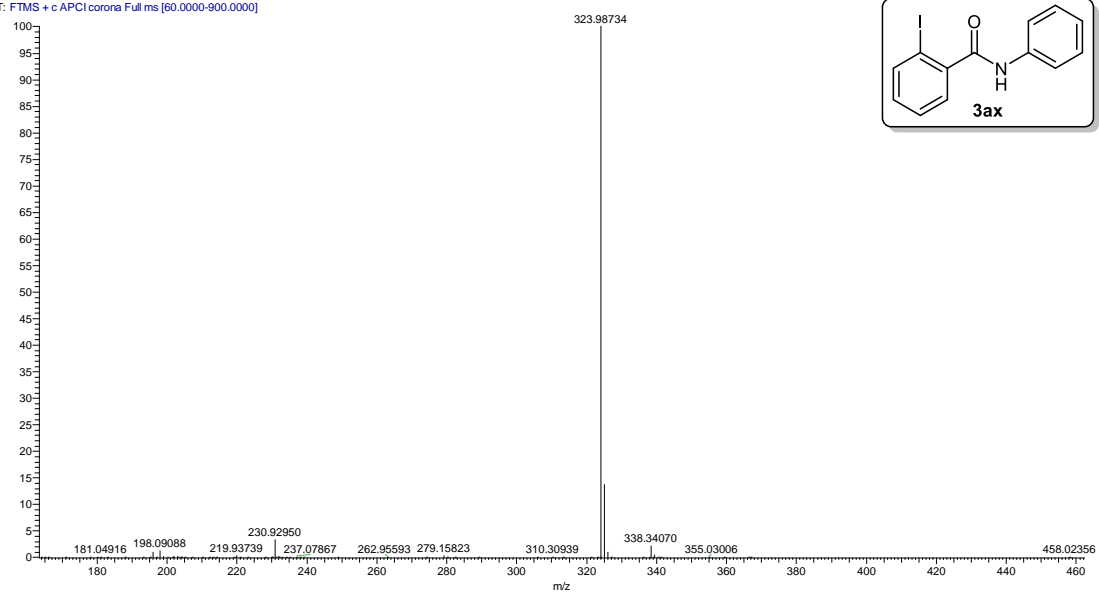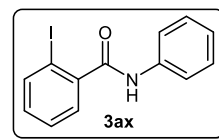

➤ <sup>1</sup>H-NMR spectrum for **3ay**

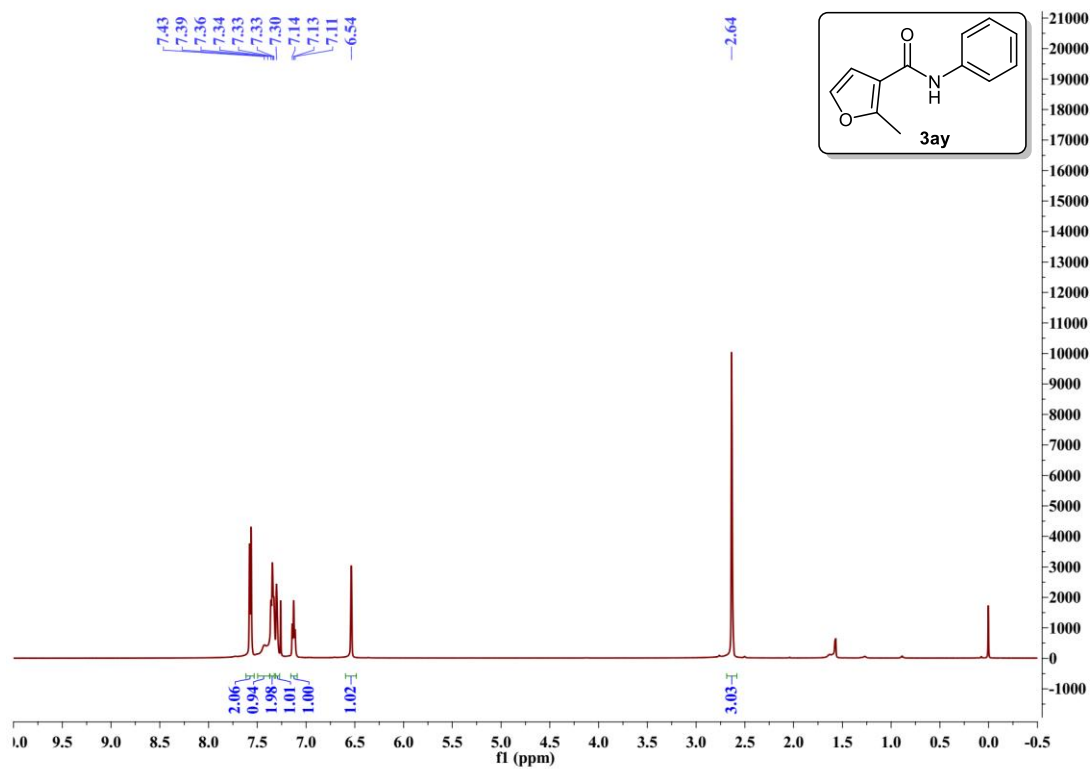

➤ <sup>13</sup>C-NMR spectrum for **3ay**

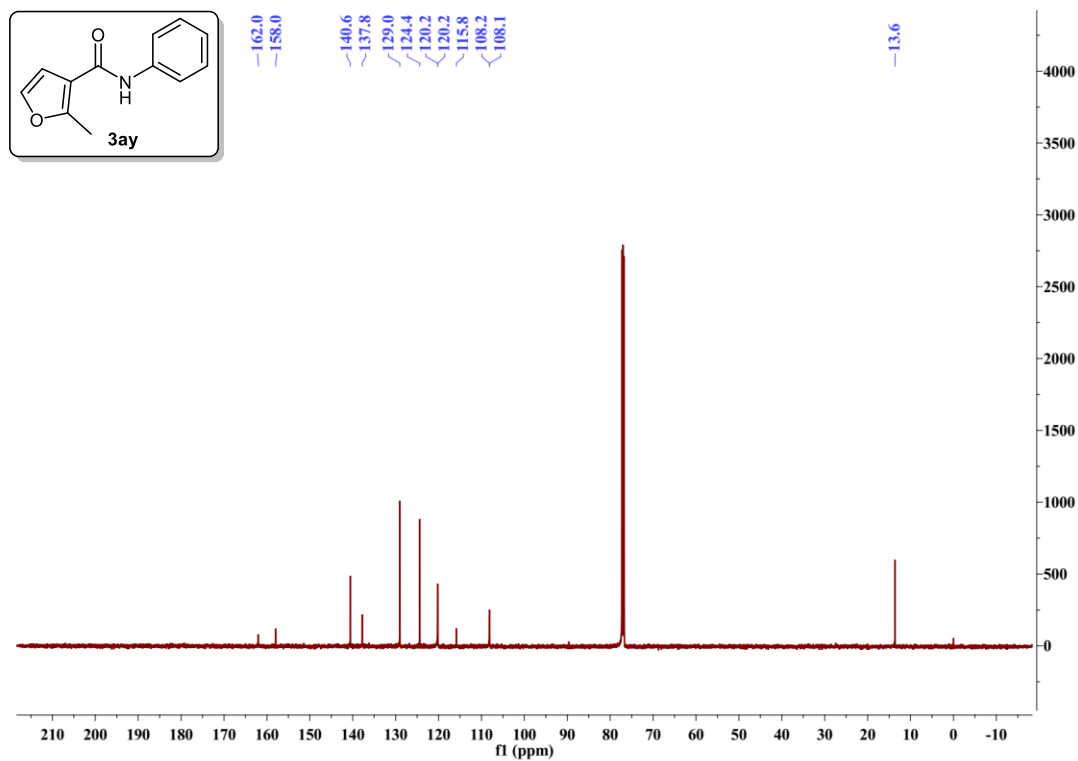

➤ HRMS spectrum for **3ay**

40#19 RT: 0.21 AV: 1 NL: 2.74E9  
T: FTMS + c APCI corona Full ms [60.0000-900.0000]

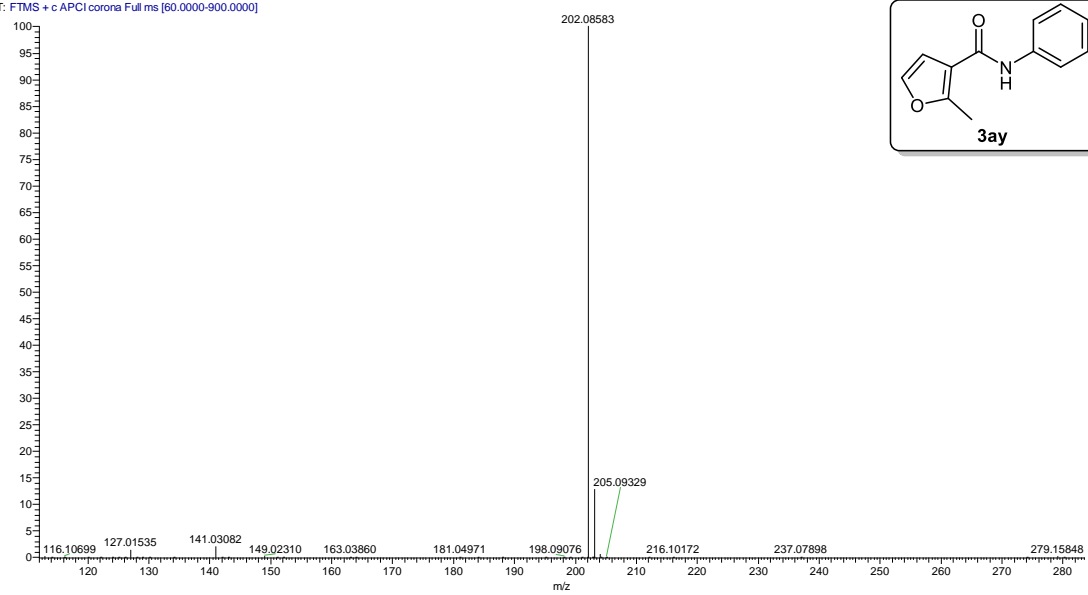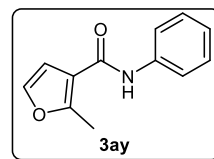

Supplement: d1gc00720c1.pdf [file d1gc00720c1.pdf]
